# Supplementary material
Source: PubMed Central journal article supplement (PMC2526118)

# Enantioselective Total Synthesis of (+)-Gliocladin C

Larry E. Overman\* and Youseung Shin

Department of Chemistry, 1102 Natural Sciences II, University of California, Irvine, California 92697-2025

## Supporting Information

(34 pages)

### Table of Contents

|                                                                                                       |         |
|-------------------------------------------------------------------------------------------------------|---------|
| A. Experimental Procedures                                                                            | S1–S8   |
| B. Tabulated <sup>1</sup> H and <sup>13</sup> C NMR spectra of natural and synthetic (+)-gliocladin C | S9–S10  |
| C. Copies of <sup>1</sup> H and <sup>13</sup> C NMR spectra of new compounds                          | S11–S33 |
| D. X-ray model of the C3 acetate analog of 13                                                         | S34     |

### A. Experimental Procedures

**General Details.** Reactions were performed in oven-dried glassware fitted with rubber septa under an argon atmosphere. CH<sub>2</sub>Cl<sub>2</sub> and THF were dried by passage through a bed of activated alumina. Commercial reagents were used without further purification. Thin-layer chromatography was performed on Merck 60 F<sub>254</sub> precoated silica gel plate, which were visualized by exposure to UV (254 nm) or stained by submersion in *p*-anisaldehyde solution or ethanolic phosphomolybdic acid solution followed by heating on a hot plate. Flash column chromatography was performed in silica gel (230–400 mesh, Merck KGA). <sup>1</sup>H NMR spectra were recorded at 500 or 600 MHz and <sup>13</sup>C NMR spectra at 125 MHz or 150 MHz with Bruker Avance spectrometers. Infrared spectra were recorded using an ASI ReactIR™ 1000 spectrometer. Mass spectra were measured with a Micromass LCT spectrometer. Optical rotations were measured with a Jasco P-1010 polarimeter.

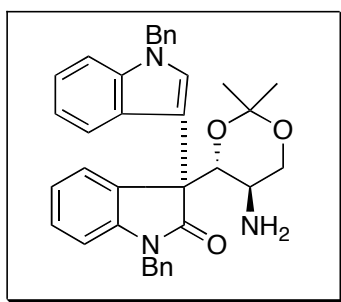

**1,3-Dioxane 7.** A methanol solution of HCl (3 M, 30 mL, prepared from AcCl and MeOH) was added at room temperature to Mukaiyama aldol product **6**<sup>1</sup> (2.57 g, 3.91 mmol). After the reaction was completed (usually 1.5 h, monitored by TLC), the solvent was removed on a rotary evaporator under reduced pressure keeping the bath temperature below 30 °C to suppress retroaldol reaction. Dichloromethane (20 mL) was added to the residue and this solution was concentrated under reduced pressure; this

<sup>1</sup> Adhikari, S.; Caille, S.; Hanbauer, M.; Ngo, V. X.; Overman, L. E. *Org. Lett.* **2005**, *7*, 2795–2798.

procedure was repeated two times to remove all residual HCl–MeOH, which if present effects the next step. Diagnostic data for the amino diol intermediate:  $^1\text{H}$  NMR (500 MHz,  $\text{CDCl}_3$ )  $\delta$  7.90 (br s, 1H), 7.45 (m, 1H), 7.41–7.28 (m, 4H), 7.25–7.01 (m, 10H), 6.92 (d,  $J = 7.8$  Hz, 1H), 6.86 (m, 1H), 6.81 (m, 1H), 6.76 (br d,  $J = 7.1$  Hz, 1H), 6.51–5.74 (br, 2H), 5.37 (d,  $J = 3.7$  Hz, 1H), 5.33 (m, 1H), 5.14 (d,  $J = 15.5$  Hz, 1H), 5.08 (br s, 2H), 5.01 (d,  $J = 15.5$  Hz, 1H), 4.97 (br s, 1H), 4.64 (br s, 1H), 3.84 (br s, 1H), 3.73 (br s, 1H).

A solution of this residue, 2,2-dimethoxypropane (15 mL), camphorsulfonic acid (0.45 g) and benzene (15 mL) was heated at 50 °C for 3 h. After the reaction was completed, the reaction mixture was cooled to room temperature, and treated with saturated aqueous  $\text{NaHCO}_3$  (5 mL). The phases were separated and the aqueous phase was extracted with EtOAc (10 mL). The combined organic layers were washed with brine, dried, and concentrated. Flash column chromatography (MeOH :  $\text{CH}_2\text{Cl}_2 = 1 : 9$ ) of the crude residue yielded 1.85 g (85%) of **7** as a colorless foam: IR (film) 3382, 3054, 2939, 1713, 1611, 1466, 1366, 1181  $\text{cm}^{-1}$ ;  $^1\text{H}$  NMR (500 MHz,  $\text{CDCl}_3$ )  $\delta$  8.30–8.25 (m, 1H), 7.53 (d,  $J = 7.3$  Hz, 1H), 7.32–7.14 (m, 12H), 7.10 (dt,  $J = 1.0, 7.5$  Hz, 1H), 7.03–6.98 (m, 2H), 6.92 (s, 1H), 6.69 (d,  $J = 7.3$  Hz, 1H), 5.29 (d,  $J = 16.1$  Hz, 1H), 5.23 (s, 2H), 5.16 (d,  $J = 8.3$  Hz, 1H), 4.48 (d,  $J = 16.1$  Hz, 1H), 3.81–3.73 (m, 1H), 3.52–3.46 (m, 2H), 1.57 (s, 3H), 1.35–1.02 (s, 2H), 1.18 (s, 3H);  $^{13}\text{C}$  NMR (125 MHz,  $\text{CDCl}_3$ )  $\delta$  177.2, 144.1, 137.8, 137.3, 136.0, 128.9, 128.5, 127.9, 127.7, 127.4, 127.2, 126.6, 126.5, 125.9, 123.5, 122.7, 121.9, 120.2, 111.4, 110.5, 109.6, 99.5, 78.0, 65.9, 60.5, 56.9, 50.1, 48.5, 43.7, 28.1, 20.3; HRMS (CI) calcd for  $\text{C}_{36}\text{H}_{35}\text{O}_3\text{N}_3$  557.2678, found 557.2657;  $[\alpha]_D^{23} -122.8$  (c 5.0,  $\text{CH}_2\text{Cl}_2$ ).

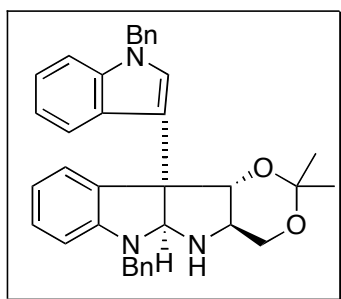

**Pyrrolidinoindoline 8.** A solution of aminodiol **7** (5.21 g, 9.35 mmol) in THF (20 mL) was added dropwise to a stirring suspension of  $\text{LiAlH}_4$  (23.3 mL, 23.4 mmol, 1.0 M solution in THF) in THF (100 mL) at room temperature. The reaction mixture was then stirred at room temperature for 2 h, cooled to 0 °C and then carefully treated with  $\text{H}_2\text{O}$  (50 mL). The phases were separated and the aqueous phase was extracted with EtOAc. The combined organic extracts were washed with brine, dried and concentrated. The residue was dissolved in MeOH

(100 mL) and silica gel (10 g) was added to the resultant solution. The mixture was stirred at room temperature open to the air for 4 h, filtered, and the eluent was concentrated. Flash column chromatography (EtOAc : hexane = 1 : 3) of the crude product yielded 4.68 g (93%) of **8** as a colorless oil: IR (film) 3350, 3051, 3031, 2877, 1605, 1488, 1355, 1173, 735  $\text{cm}^{-1}$ ;  $^1\text{H}$  NMR (500 MHz,  $\text{CDCl}_3$ )  $\delta$  7.82 (s, 1H), 7.44–7.40 (m, 2H), 7.32–7.22 (m, 6H), 7.16–7.12 (m, 3H), 7.09 (dt,  $J = 7.8, 1.3$  Hz, 1H), 6.99 (dt,  $J = 6.9, 1.3$  Hz, 1H), 6.87 (dd,  $J = 7.3, 0.9$  Hz, 1H), 6.73–6.65 (m, 2H), 6.58 (d,  $J = 7.8$  Hz, 1H), 6.52 (t,  $J = 7.3$  Hz, 1H), 5.41 (s, 1H), 5.23 (s, 2H), 4.64 (d,  $J = 15.5$  Hz, 1H), 4.41 (d,  $J = 15.5$  Hz, 1H), 4.11–3.99 (m, 2H), 3.79 (t,  $J = 10.3$  Hz, 1H), 3.57 (dt,  $J = 10.3, 4.6$  Hz, 1H), 2.11 (s, 1H), 1.51 (s, 3H), 1.39 (s, 3H);  $^{13}\text{C}$  NMR (125 MHz,  $\text{CDCl}_3$ )  $\delta$  148.6, 138.4, 137.7, 136.7, 133.4, 129.1, 128.9, 128.6, 128.4, 128.0, 127.9, 127.7, 127.3, 124.5, 121.7, 120.6, 119.2, 117.5, 113.7, 109.9, 106.3, 100.8, 87.9, 82.7, 68.2, 60.7, 56.4, 54.7, 50.5, 49.2, 29.9, 19.7; HRMS (CI) calcd for  $\text{C}_{36}\text{H}_{35}\text{O}_2\text{N}_3$  541.2729, found 541.2725;  $[\alpha]_D^{23} +137.6$  (c 3.0,  $\text{CH}_2\text{Cl}_2$ ).

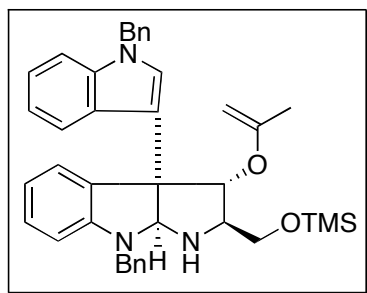

**Propenyl Ether 9.** Following the general procedure of Rychnovsky,<sup>2</sup> TMSOTf (13.3 mL, 69.2 mmol) and *i*-Pr<sub>2</sub>EtN (13.6 mL, 77.9 mmol) were added by syringe to a stirred solution of pyrrolidinoindoline **8** (4.68 g, 8.65 mmol) and CH<sub>2</sub>Cl<sub>2</sub> (100 mL). The reaction mixture was stirred at room temperature for 48 h, and saturated aq. NaHCO<sub>3</sub> (40 mL) was added dropwise at a rate that minimized exothermic heating. The phases were separated and the aqueous phase was extracted with Et<sub>2</sub>O (100 mL). The combined organic layers

were washed with brine, dried, and concentrated. Flash column chromatography (EtOAc : hexane = 1 : 15) of the crude product yielded 4.83 g (91%) of **9** as a colorless oil: IR (film) 3051, 2956, 1603, 1495, 1355, 1250, 1077, 872, 735 cm<sup>-1</sup>; <sup>1</sup>H NMR (500 MHz, CDCl<sub>3</sub>) δ 7.71 (d, *J* = 8.1 Hz, 1H), 7.34-7.18 (m, 9H), 7.16-7.12 (m, 1H), 7.09-6.98 (m, 5H), 6.83 (s, 1H), 6.61 (t, *J* = 7.5 Hz, 1H), 6.38 (d, *J* = 7.9 Hz, 1H), 5.46 (s, 1H), 5.18 (s, 2H), 5.10 (s, 1H), 4.50 (s, 2H), 4.24 (s, 1H), 3.83 (s, 1H), 3.66 (t, *J* = 7.8 Hz, 1H), 3.29-3.23 (m, 1H), 2.94 (t, *J* = 9.1 Hz, 1H), 1.35 (s, 3H); <sup>13</sup>C NMR (125 MHz, CDCl<sub>3</sub>) δ 159.0, 149.3, 139.1, 138.1, 137.5, 133.4, 129.0, 128.9, 128.8, 128.2, 127.8, 127.4, 127.0, 126.8, 125.1, 122.1, 121.7, 119.1, 117.9, 117.0, 109.9, 107.2, 88.9, 85.2, 83.3, 67.2, 65.4, 60.8, 50.2, 49.2, 21.4, -0.3; HRMS (CI) calcd for C<sub>39</sub>H<sub>44</sub>N<sub>3</sub>O<sub>2</sub>Si 614.3203 (M + H), found 614.3187; [α]<sub>D</sub><sup>23</sup> +126.2 (*c* 2.0, CH<sub>2</sub>Cl<sub>2</sub>).

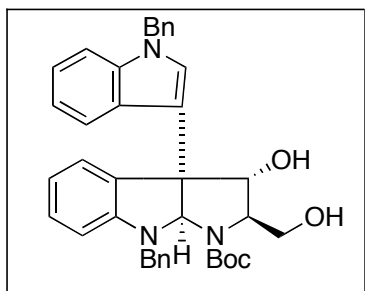

**Diol 10.** Aqueous Na<sub>2</sub>CO<sub>3</sub> solution (10%, 20 mL) was added to a stirring solution of amine **9** (5.30 g, 8.64 mmol) in THF (20 mL). After stirring at room temperature for 10 min, Boc<sub>2</sub>O (1.89 g, 8.67 mmol) was added. After 2 h, H<sub>2</sub>O (50 mL) and Et<sub>2</sub>O (50 mL) were added. The phases were separated and the aqueous phase was extracted twice with Et<sub>2</sub>O (20 mL). The combined organic layers were washed with brine, dried, and concentrated. Flash column chromatography (EtOAc : hexane = 1 : 5) of the crude residue yielded 6.20 g (quantitative yield) of the Boc

derivative as a colorless oil: IR (film) 3029, 2991, 2931, 1696, 1604, 1467, 1374, 1216 cm<sup>-1</sup>; <sup>1</sup>H NMR (500 MHz, CDCl<sub>3</sub>) δ 7.71 (d, *J* = 8.0 Hz, 1H), 7.38-7.22 (m, 8H), 7.19-7.08 (m, 2H), 7.09-7.03 (m, 4H), 6.83-6.68 (m, 2H), 6.32-6.19 (m, 2H), 5.45 (s, 1H), 5.21 (s, 2H), 5.15 (s, 1H), 4.51 (s, 2H), 4.29 (s, 1H), 3.87 (s, 1H), 3.75-3.67 (m, 1H), 3.25-3.21 (m, 1H), 2.93 (t, *J* = 9.8 Hz, 1H), 1.43 (s, 9H), 1.35 (s, 3H), 0.01 (s, 9H); <sup>13</sup>C NMR (125 MHz, CDCl<sub>3</sub>) δ 172.3, 159.1, 149.4, 139.0, 138.1, 137.7, 133.2, 129.1, 128.8, 128.7, 128.5, 128.4, 128.1,

1. <sup>2</sup> Rychnovsky, S. D.; Kim, J. *Tetrahedron Lett.* **1991**, 32, 7219.

127.9, 127.5, 126.9, 125.1, 122.3, 119.0, 117.8, 117.2, 109.9, 107.5, 88.7, 85.3, 83.5, 67.1, 65.4, 60.9, 50.5, 49.1, 28.6, 24.7, 21.3, 0.1; HRMS (CI) calcd for  $C_{44}H_{52}N_3O_4Si$  714.3728 (M + H), found 714.3731;  $[\alpha]_D^{26} +46.8$  (*c* 0.26,  $CHCl_3$ ).

Oxalic acid (0.22 g, 1.75 mmol) was added to a stirred solution of this Boc-pyrrolidinoindoline intermediate (6.16 g, 8.64 mmol) in MeOH (48 mL) at room temperature. After stirring for 1 h at room temperature, saturated aqueous  $NaHCO_3$  (10 mL) and EtOAc (50 mL) were added. The phases were separated and the aqueous phase was extracted twice with EtOAc (20 mL). The combined organic layers were washed with brine, dried, and concentrated. Flash column chromatography (EtOAc : hexane = 1 : 2) of the crude material yielded 3.68 g (71%) of diol **10** as a colorless oil: IR (film) 3423, 3028, 2993, 2929, 1697, 1605, 1466, 1374, 1217  $cm^{-1}$ ;  $^1H$  NMR (500 MHz,  $CDCl_3$ )  $\delta$  7.82-7.66 (m, 1H), 7.35-7.12 (m, 12H), 7.12-7.03 (m, 3H), 6.74-6.62 (m, 1H), 6.42-6.28 (m, 1H), 6.15 (s, 1H), 5.14 (s, 2H), 5.03 (s, 1H), 4.93 (t, *J* = 16.0 Hz, 1H), 4.67 (s, 2H), 4.44-4.21 (m, 1H), 3.87-3.64 (m, 1H), 3.11-2.89 (m, 1H), 2.37 (br s, 1H), 1.83 (br s, 1H), 1.43 (s, 9H);  $^{13}C$  NMR (125 MHz,  $CDCl_3$ )  $\delta$  172.3, 159.1, 149.4, 139.0, 138.1, 137.7, 133.2, 129.1, 128.8, 128.7, 128.5, 128.4, 128.1, 127.9, 127.5, 126.9, 125.1, 122.3, 119.0, 117.8, 117.2, 109.9, 88.7, 83.5, 67.1, 65.4, 60.9, 50.5, 49.1, 28.6, 24.7; HRMS (CI) calcd for  $C_{38}H_{40}N_3O_4$  602.3020 (M + H), found 602.3024;  $[\alpha]_D^{25} +109.7$  (*c* 0.75,  $CHCl_3$ ).

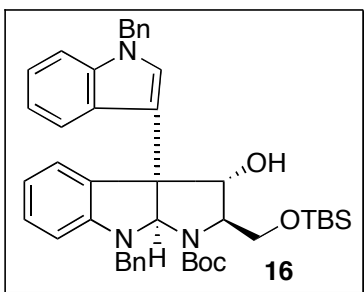

**TBS Intermediate 16.** NaH (60% dispersion in mineral oil, 0.49 g, 12.2 mmol) was added to a stirring solution of diol **10** (3.68 g, 6.11 mmol) in THF (100 mL) at room temperature. After stirring for 10 min, TBSCl (1.0 g, 6.63 mmol) was added and the reaction mixture was stirred for an additional 2 h at room temperature. Brine (50 mL) and  $Et_2O$  (100 mL) were added, the phases were separated, and the aqueous phase was extracted twice with  $Et_2O$ . The combined organic layers were dried and concentrated. Flash column chromatography (EtOAc

: hexane = 1 : 9) of the residue yielded 4.20 g (96%) of **16** as a colorless oil: IR (film) 3489, 3030, 2957, 2930, 1695, 1606, 1467, 1366, 1254  $cm^{-1}$ ;  $^1H$  NMR (500 MHz,  $CDCl_3$ )  $\delta$  7.82-7.67 (m, 1H), 7.36-7.11 (m, 12H), 7.12-7.04 (m, 3H), 6.76-6.62 (m, 1H), 6.42-6.28 (m, 1H), 6.17 (s, 1H), 5.16 (s, 2H), 5.02 (s, 1H), 4.92 (t, *J* = 15.6 Hz, 1H), 4.65 (s, 2H), 4.47-4.21 (m, 1H), 3.88-3.64 (m, 1H), 3.11-2.87 (m, 1H), 2.34 (br s, 1H), 1.43 (s, 9H), 0.86 (s, 9H), -0.03 (s, 6H);  $^{13}C$  NMR (125 MHz,  $CDCl_3$ )  $\delta$  172.1, 159.2, 149.7, 139.2, 138.0, 137.7, 133.4, 129.2, 128.8, 128.7, 128.5, 128.4, 128.0, 127.8, 127.5, 126.7, 125.1, 122.5, 119.1, 117.9, 117.2, 109.8, 88.6, 83.5, 67.2, 65.6, 60.9, 50.7, 49.3, 28.8, 24.6, 14.5, -3.2, -4.9; HRMS (CI) calcd for  $C_{44}H_{54}N_3O_4Si$  716.3884 (M + H), found 716.3891;  $[\alpha]_D^{25} +99.8$  (*c* 1.2,  $CHCl_3$ ).

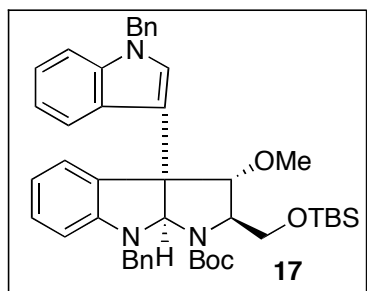

**Methyl TBS Intermediate 17.** NaH (60% dispersion in mineral oil, 36 mg, 0.92 mmol) was added to a stirring solution of alcohol **16** (101 mg, 0.14 mmol) in THF (2.8 mL) at 0 °C. After 10 min, MeI (0.088 mL, 1.4 mmol) was added dropwise and the reaction mixture was warmed to room temperature. After 2 h, the reaction mixture was quenched by adding  $H_2O$  (10 mL) and  $Et_2O$  (10 mL) was added. The phases were separated and the aqueous phase was extracted

twice with Et<sub>2</sub>O (5 mL). The combined organic layers were washed with brine, dried and concentrated. Flash column chromatography (EtOAc : hexane = 1 : 9) of the crude material yielded 79.2 mg (77%) of **17** as a colorless oil: IR (film) 2954, 2929, 2856, 1694, 1603, 1495, 1453, 1389, 1250, 1158, 1096, 835 cm<sup>-1</sup>; <sup>1</sup>H NMR (500 MHz, CDCl<sub>3</sub>) δ 7.71 (d, *J* = 7.9 Hz, 1H), 7.39-7.17 (m, 8H), 7.15-7.10 (m, 2H), 6.99 (s, 1H), 6.77 (m, 3H), 6.31 (d, *J* = 7.7 Hz, 1H), 6.17 (s, 1H), 5.35-5.20 (m, 3H), 4.75-4.68 (m, 3H), 4.55 (m, 1H), 3.79 (m, 1H), 3.30 (s, 3H), 3.03 (m, 1H), 1.52-1.39 (m, 9H), 0.95-0.93 (m, 9H), 0.05-0.01 (m, 6H); <sup>13</sup>C NMR (125 MHz, CDCl<sub>3</sub>) δ 154.5, 148.7, 139.2, 137.7, 137.5, 131.9, 128.8, 128.5, 128.3, 127.7, 127.5, 127.3, 126.9, 126.6, 126.0, 126.3, 124.8, 122.0, 121.6, 119.1, 117.8, 115.6, 109.9, 107.2, 88.5, 87.8, 80.7, 66.2, 62.4, 60.6, 57.7, 50.1, 29.8, 28.5, 28.3, 25.9, -5.4; HRMS (CI) calcd for C<sub>45</sub>H<sub>55</sub>N<sub>3</sub>O<sub>4</sub>Si 752.3860 (M + Na), found 752.3864; [α]<sub>D</sub><sup>24</sup> +36.4 (*c* 0.11, CHCl<sub>3</sub>).

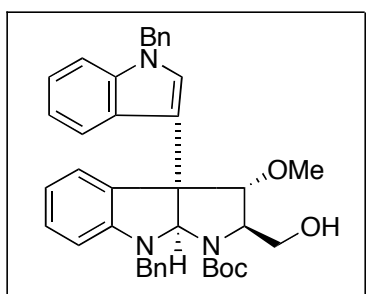

**Alcohol Intermediate 11.** TBAF (1.0 M solution in THF, 0.11 mL) was added dropwise to a stirred solution of TBS-protected alcohol **17** (79.2 mg, 0.11 mmol) in THF (5 mL) at room temperature. After 12 h at room temperature, the reaction was concentrated and the residue was purified by flash chromatography (EtOAc : hexane = 3 : 7) to yield 61.2 mg (92%) of alcohol **11** as a colorless foam: IR (film) 2981, 2954, 1677, 1603, 1391, 1368, 1266, 1177, 1138, 1096, 908, 735 cm<sup>-1</sup>; <sup>1</sup>H NMR (500 MHz, CDCl<sub>3</sub>) δ 7.46 (s, 1H), 7.38-

7.28 (m, 9H), 7.22 (m, 2H), 7.15 (m, 3H), 7.08 (m, 1H), 6.77 (t, *J* = 7.3 Hz, 1H), 6.44 (m, 1H), 6.15 (m, 1H), 5.37 (m, 2H), 4.80-4.63 (m, 2H), 4.57 (m, 1H), 4.28 (m, 1H), 3.83-3.60 (m, 3H), 3.41 (s, 3H), 1.48-1.32 (m, 9H); <sup>13</sup>C NMR (125 MHz, CDCl<sub>3</sub>) δ 156.5, 148.9, 138.9, 137.7, 137.1, 128.8, 128.7, 128.3, 127.6, 126.9, 126.6, 124.8, 121.7, 121.5, 119.2, 118.2, 112.6, 110.0, 108.0, 90.5, 89.8, 81.7, 67.3, 65.7, 58.8, 51.0, 50.2, 28.1, 21.1; HRMS (CI) calcd for C<sub>39</sub>H<sub>41</sub>N<sub>3</sub>O<sub>4</sub>Na 638.2995 (M + Na), found 638.2996; [α]<sub>D</sub><sup>24</sup> +57.4 (*c* 0.2, CHCl<sub>3</sub>).

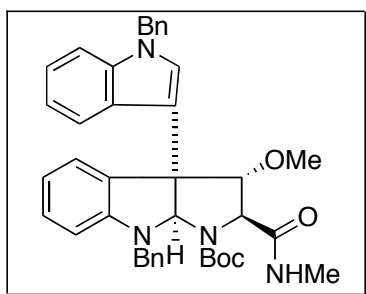

**Boc-Protected Carboxamide 12.** Dess-Martin periodinane<sup>3</sup> (0.25 g, 0.60 mmol) and pyridine (0.097 mL) were added to a solution of alcohol **11** (61.2 mg, 0.10 mmol) and CH<sub>2</sub>Cl<sub>2</sub> (2 mL) at room temperature. After 1 h, the mixture was quenched with saturated aqueous NaHCO<sub>3</sub> (10 mL) and saturated aqueous Na<sub>2</sub>S<sub>2</sub>O<sub>3</sub> (10 mL). The resulting mixture was extracted with ethyl ether (10 mL x 2) and the combined extracts were dried over anhydrous MgSO<sub>4</sub>. Filtration and concentration provided the crude aldehyde intermediate as a pale yellow oil, which was used immediately in the next reaction without further purification.

Following the general procedure of Pinnick,<sup>4</sup> a 2 M solution of 2-methyl-2-butene in THF (0.28 mL, 0.57 mmol), NaH<sub>2</sub>PO<sub>4</sub>·H<sub>2</sub>O (0.041 g, 0.30 mmol), and NaClO<sub>2</sub> (0.24 g, 0.30 mmol) were added successively at room temperature to a stirring mixture of this crude aldehyde, THF (0.5 mL) and H<sub>2</sub>O (0.5 mL). The reaction mixture was then stirred for an

<sup>3</sup> (a) Dess, D. B.; Martin, J. C. *J. Org. Chem.* **1983**, *48*, 4155–4156. (b) Meyer, S. D.; Schreiber, S. L. *J. Org. Chem.* **1994**, *59*, 7549–7552.

<sup>4</sup> Bal, B. S.; Childers, W. E.; Pinnick, H. W. *Tetrahedron*, **1981**, *37*, 2091.

additional 2 h at room temperature, diluted with H<sub>2</sub>O (10 mL), and extracted with EtOAc (2 x 10 mL). The combined organic layers were dried over MgSO<sub>4</sub>, concentrated, and the residual crude acid was used for the next reaction without further purification.

Benzotriazole-1-yloxy-tris(dimethylamino)phosphonium hexafluorophosphate (BOP, 48 mg, 0.11 mmol), MeNH<sub>3</sub>Cl (7.4 mg, 0.11 mmol), and Et<sub>3</sub>N (0.021 mL, 0.15 mmol) were added successively at room temperature to a stirring solution of the crude acid in CH<sub>2</sub>Cl<sub>2</sub> (1 mL). After 3h, the reaction was completed and the reaction was concentrated. The residue was purified by flash chromatography (hexane : EtOAc = 3 : 2) to yield 38.1 mg (60% for three steps) of amide product **12** as a pale yellow oil: IR (film) 3054, 2987, 1673, 1441, 1370, 1266, 1144, 895 cm<sup>-1</sup>; <sup>1</sup>H NMR (500 MHz, CDCl<sub>3</sub>) δ 7.92 (d, *J* = 7.9 Hz, 1H), 7.49-7.42 (m, 4H), 7.34-7.29 (m, 3H), 7.28-7.23 (m, 3H), 7.19-7.14 (m, 2H), 7.09-7.07 (m, 3H), 6.73 (m, 1H), 6.22 (s, 1H), 5.87 (br s, 1H), 5.24 (d, *J* = 16.4 Hz, 1H), 5.21 (d, *J* = 16.3 Hz, 1H), 4.91 (m, 1H), 4.70 (m, 2H), 3.41 (m, 3H), 3.09 (d, *J* = 5.0 Hz, 3H), 2.37 (d, *J* = 4.9 Hz, 3H), 1.49 (m, 9H); <sup>13</sup>C NMR (125 MHz, CDCl<sub>3</sub>) δ 170.2, 155.4, 148.7, 142.4, 139.9, 137.5, 131.2, 129.0, 128.7, 128.6, 128.33, 128.25, 127.5, 127.2, 126.6, 121.7, 119.3, 118.7, 110.0, 92.5, 68.2, 51.1, 50.1, 29.8, 28.3, 26.9, 26.0; HRMS (CI) calcd for C<sub>40</sub>H<sub>42</sub>N<sub>4</sub>O<sub>4</sub>Na 665.3104 (M + Na), found 665.3103; [α]<sub>D</sub><sup>25</sup> +52.1 (c 0.25, CHCl<sub>3</sub>).

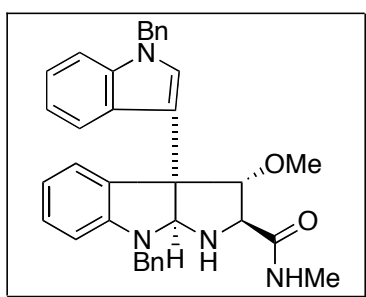

**Aminocarboxamide 13.** Following the general procedure Danishefsky,<sup>5</sup> Boc-protected amide **12** (49.8 mg, 77.5 μmol) was dissolved in dry MeCN (1.5 mL) and this solution was cooled to 0 °C under argon. TMSI (0.066 mL, 0.47 mmol) was then added dropwise over 10 min. After 30 min, the reaction mixture was poured into sat. aqueous NaHCO<sub>3</sub> (20 mL) and extracted with EtOAc (2 x 10 mL). The combined organic layers were washed with brine, dried, filtered, and concentrated. Flash column chromatography (EtOAc : hexane

= 1 : 1) of the crude residue yielded 27.3 mg (65%) of aminocarboxamide **13** as a colorless oil: IR (film) 3369, 2925, 1733, 1665, 1603, 1530, 1482, 1453, 1353, 1245, 1092 cm<sup>-1</sup>; <sup>1</sup>H NMR (500 MHz, CDCl<sub>3</sub>) δ 7.74 (d, *J* = 8.0 Hz, 1H), 7.42-7.39 (m, 2H), 7.37-7.31 (m, 7H), 7.27 (d, *J* = 8.2 Hz, 1H), 7.21-7.16 (m, 3H), 7.13-7.10 (m, 1H), 7.08 (dt, *J* = 1.1, 7.6 Hz, 1H), 6.94 (m, 1H), 6.69 (t, *J* = 7.5 Hz, 1H), 6.49 (d, *J* = 7.8 Hz, 1H), 5.42 (s, 1H), 5.26 (s, 2H), 4.94 (d, *J* = 2.0 Hz, 1H), 4.60 (d, *J* = 14.7 Hz, 1H), 4.48 (d, *J* = 14.6 Hz, 1H), 4.08 (s, 1H), 3.44 (s, 3H), 2.39 (d, *J* = 5.0 Hz, 3H); <sup>13</sup>C NMR (125 MHz, CDCl<sub>3</sub>) δ 172.6, 148.8, 138.1, 137.4, 137.2, 132.4, 128.77, 128.75, 128.67, 128.0, 127.6, 127.4, 127.1, 126.3, 125.0, 121.6, 121.0, 119.1, 118.5, 114.6, 109.9, 107.2, 90.7, 89.0, 67.6, 59.7, 58.1, 50.1, 49.9, 29.8, 25.5; HRMS (CI) calcd for C<sub>35</sub>H<sub>34</sub>O<sub>2</sub>N<sub>4</sub>Na 565.2579, found 565.2580; [α]<sub>D</sub><sup>26</sup> +66.3 (c 0.10, CHCl<sub>3</sub>).

<sup>5</sup> Depew, K. M.; Marsden, S.P.; Zatorska, D.; Zatorski, A.; Bornmann, W. G.; Danishefsky, S. J. *J. Am. Chem. Soc.* **1999**, *121*, 11953.

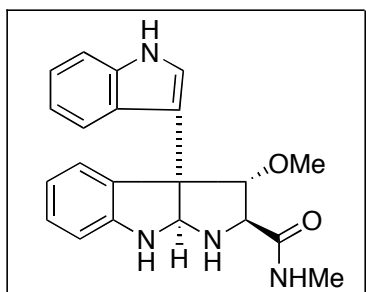

**Triamine Carboxamide 14.** Freshed cut Na (30 mg, 1.3 mmol) was added to a liquid ammonia (1.6 mL) in a 10 mL two-necked flask cooled to  $-78\text{ }^{\circ}\text{C}$ . After 5 min, a solution of *t*-BuOH (0.061 mL) in THF (0.5 mL) was added to the blue ammonia solution, followed by a solution of amide **13** (17.3 mg, 31.9  $\mu\text{mol}$ ) in THF (1 mL). The reaction mixture was stirred at  $-78\text{ }^{\circ}\text{C}$  for 30 min at which the blue color had disappeared. The reaction mixture then was quenched with solid  $\text{NH}_4\text{Cl}$  (0.2 g), and ammonia was allowed to evaporate

by replacing the cooling bath with a water bath. The residue was dissolved in  $\text{CH}_2\text{Cl}_2$  (4 mL) and filtered through a cotton-plugged pipette. After concentration of the filtrate, flash column chromatography (MeOH:  $\text{CH}_2\text{Cl}_2 = 1 : 9$ ) of the crude residue yielded 10.0 mg (87%) of amine **14** as a colorless oil: IR (film) 3330, 2927, 1648, 1605, 1538, 1484, 1461, 1410, 1241, 1100, 1081, 1025  $\text{cm}^{-1}$ ;  $^1\text{H}$  NMR (500 MHz,  $\text{CDCl}_3$ )  $\delta$  8.07 (br s, 1H), 7.85 (d,  $J = 7.9$  Hz, 1H), 7.30 (dd,  $J = 10.4, 8.1$  Hz, 1H), 7.16-7.12 (m, 3H), 7.17 (t,  $J = 7.8$  Hz, 1H), 7.13-7.10 (m, 2H), 7.02 (dt,  $J = 1.0, 7.6$  Hz, 1H), 6.98 (d,  $J = 2.4$  Hz, 1H), 6.70 (t,  $J = 7.5$  Hz, 1H), 6.64 (d,  $J = 7.8$  Hz, 1H), 5.62 (s, 1H), 4.89 (s, 1H), 4.02 (s, 1H), 3.37 (s, 3H), 2.32 (d,  $J = 5.0$  Hz, 3H);  $^{13}\text{C}$  NMR (125 MHz,  $\text{CDCl}_3$ )  $\delta$  172.4, 148.0, 137.0, 131.4, 128.8, 126.5, 125.4, 122.5, 121.8, 121.1, 119.6, 119.4, 115.9, 111.4, 109.8, 90.7, 84.5, 68.3, 61.4, 57.8, 25.4; HRMS (CI) calcd for  $\text{C}_{21}\text{H}_{22}\text{O}_2\text{N}_4\text{Na}$  385.1640, found 385.1641;  $[\alpha]_D^{23} +23.5$  (*c* 0.19,  $\text{CHCl}_3$ ).

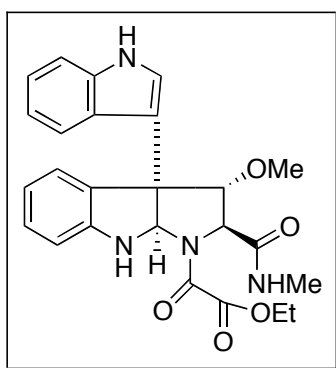

**Oxalyl Amide 15.** Ethyl chlorooxoacetate (5.0  $\mu\text{L}$ , 44  $\mu\text{mol}$ ) and  $\text{Et}_3\text{N}$  (6  $\mu\text{L}$ , 44  $\mu\text{mol}$ ) were added at room temperature to a solution of triamine amide **14** (10.7 mg, 30.0  $\mu\text{mol}$ ) in dry  $\text{CH}_2\text{Cl}_2$  (0.6 mL). After 30 min, the solvent was evaporated under reduced pressure, and the resulting residue was subjected to a flash column chromatography (EtOAc : hexane = 7 : 3) to give 11.8 mg (87%) of **15** as a colorless oil: IR (film) 3357, 2927, 1737, 1656, 1542, 1466, 1414, 1250, 1218, 1162, 1102, 1015  $\text{cm}^{-1}$ ;  $^1\text{H}$  NMR (500 MHz,  $\text{CDCl}_3$ )  $\delta$  8.07 (br s, 1H), 7.71 (d,  $J = 8.1$  Hz, 1H), 7.33 (d,  $J = 7.7$  Hz, 2H), 7.19 (m, 1H), 7.15-7.07 (m, 2H), 7.03 (s, 1H), 6.79-6.76 (m, 1H), 6.68 (d,  $J =$

7.6 Hz, 1H), 6.14 (s, 1H), 5.55 (s, 1H), 5.03 (s, 1H), 4.90 (s, 1H), 4.25 (m, 2H), 3.38 (s, 3H), 2.34 (d,  $J = 4.9$  Hz, 3H), 1.43 (m, 3H);  $^{13}\text{C}$  NMR (125 MHz,  $\text{CDCl}_3$ )  $\delta$  168.1, 162.0, 160.5, 146.8, 136.9, 129.9, 129.5, 126.2, 125.7, 123.1, 122.2, 121.0, 120.0, 119.7, 114.2, 111.5, 109.5, 87.8, 83.4, 67.6, 63.4, 61.4, 58.0, 26.1, 14.0; HRMS (CI) calcd for  $\text{C}_{25}\text{H}_{26}\text{O}_5\text{N}_4\text{Na}$  485.1801, found 485.1788;  $[\alpha]_D^{23} +63.0$  (*c* 0.26,  $\text{CHCl}_3$ ).

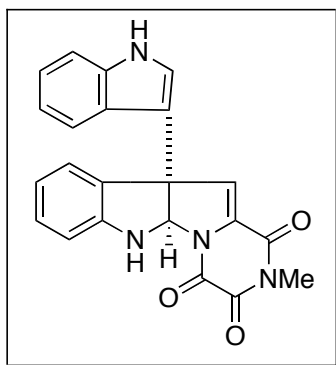

**(+)-Gliocladin C (1).** Following the general procedure of Mulliez,<sup>6</sup> 1,1,1,3,3,3-hexamethyldisilane (1 mL) was added to carboxamide ester **15** (2.8 mg) in sealed tube and the reaction mixture was placed in a 140 °C oil bath. After 20 min, the tube was removed from the bath, allowed to cool to room temperature, and volatile components were removed under high vacuum. Flash column chromatography (EtOAc : hexane = 1 : 1) of the crude residue yielded 1.7 mg (73%) of (+)-gliocladin C (**1**) as a yellow powder: IR (film) 3351, 1679, 1470, 1318 cm<sup>-1</sup>; <sup>1</sup>H NMR (600 MHz, Acetone-d<sub>6</sub>) δ 10.33 (br s, 1H), 7.43 (br d *J* = 8.2 Hz, 1H), 7.33 (dd, *J* = 0.7, 8.2 Hz, 1H), 7.23 (d, *J* = 2.6

Hz, 1H), 7.18 (br d, *J* = 7.4 Hz, 1H), 7.13 (ddd, *J* = 8.7, 7.5, 1.1 Hz, 1H), 7.11 (ddd, *J* = 8.1, 7.1, 1.0 Hz, 1H), 6.96 (s, 1H), 6.90 (ddd, *J* = 8.0, 7.1, 0.8 Hz, 1H), 6.86 (br d, *J* = 7.9 Hz, 1H), 6.72 (ddd, *J* = 7.4, 7.3, 1.0 Hz, 1H), 6.61 (br d, *J* = 1.9 Hz, 1H), 6.24 (d, *J* = 2.6 Hz, 1H), 3.26 (s, 3H); <sup>13</sup>C NMR (125 MHz, acetone-d<sub>6</sub>) δ 158.62, 158.01, 150.70, 149.93, 138.47, 133.08, 131.11, 129.68, 126.94, 126.29, 125.47, 123.70, 122.76, 120.13, 120.11, 119.65, 116.66, 112.63, 110.58, 84.69, 60.97, 27.09; HRMS (CI) calcd for C<sub>22</sub>H<sub>16</sub>N<sub>4</sub>O<sub>3</sub>Na 407.1120 (M + Na), found 407.1118; [α]<sub>D</sub><sup>27</sup> +116.4 (c 0.02, CHCl<sub>3</sub>), reported<sup>7</sup> [α]<sub>D</sub> +131.4 (c 0.07, CHCl<sub>3</sub>).

<sup>6</sup> Mulliez, M.; Royer, J. *Tetrahedron* **1984**, *40*, 5143–5151.

<sup>7</sup> Usami, Y.; Yamaguchi, J.; Numata, A. *Heterocycles* **2004**, *63*, 1123–1129.



B. Tabulated  $^1\text{H}$  and  $^{13}\text{C}$  NMR spectra of natural and synthetic (+)-gliocladin CLITERATURE  
(500 MHz, acetone- $d_6$ )SYNTHETIC  
(600 MHz, acetone- $d_6$ )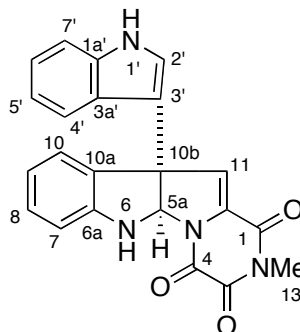

|     |                                 |
|-----|---------------------------------|
| 1   |                                 |
| 3   |                                 |
| 4   |                                 |
| 5a  | 6.24 (d, 3.2)                   |
| 6   | 6.61 (br d, 3.2)                |
| 7   | 6.86 (br d, 8.2)                |
| 8   | 7.13 (br dd, 8.2, 7.6)          |
| 9   | 6.72 (dddd, 7.6, 7.3, 1.6, 1.1) |
| 10  | 7.18 (br d, 7.3)                |
| 10a |                                 |
| 10b |                                 |
| 11a | 6.96 (s)                        |
| 11b |                                 |
| 12  |                                 |
| 13  | 3.25 (s)                        |
| 1'  | 10.3 (brd, 1.6)                 |
| 1a' |                                 |
| 2'  | 7.23 (d, 1.6)                   |
| 3a' |                                 |
| 4'  | 7.33 (br d, 8.2)                |
| 5'  | 6.90 (ddd, 8.0, 7.1, 0.9)       |
| 6'  | 7.10 (ddd, 8.2, 7.1, 1.1)       |
| 7'  | 7.43 (br d, 8.2)                |

|     |                           |
|-----|---------------------------|
| 1   |                           |
| 3   |                           |
| 4   |                           |
| 5a  | 6.24 (d, 2.6)             |
| 6   | 6.61 (br d, 1.9)          |
| 7   | 6.86 (br d, 7.9)          |
| 8   | 7.13 (ddd, 8.7, 7.5, 1.1) |
| 9   | 6.72 (ddd, 7.4, 7.3, 1.0) |
| 10  | 7.18 (br d, 7.4)          |
| 10a |                           |
| 10b |                           |
| 11a | 6.96 (s)                  |
| 11b |                           |
| 12  |                           |
| 13  | 3.26 (s)                  |
| 1'  | 10.33 (br s)              |
| 1a' |                           |
| 2'  | 7.23 (d, 2.6)             |
| 3a' |                           |
| 4'  | 7.33 (dd, 8.2, 0.7)       |
| 5'  | 6.90 (ddd, 8.0, 7.1, 0.8) |
| 6'  | 7.11 (ddd, 8.1, 7.1, 1.0) |
| 7'  | 7.43 (br d, 8.2)          |

Source : *Heterocycles* **2004**, *63*, 1123

**LITERATURE**  
(125 MHz, acetone-d<sub>6</sub>)

**SYNTHETIC**  
(125 MHz, acetone-d<sub>6</sub>)

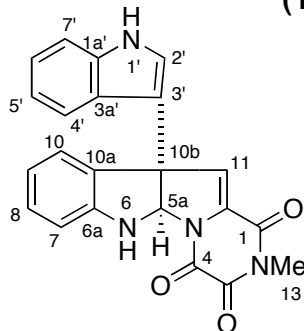

|     |        |
|-----|--------|
| 1   | 158.62 |
| 3   | 158.01 |
| 4   | 150.71 |
| 5a  | 84.72  |
| 6a  | 149.94 |
| 7   | 110.59 |
| 8   | 129.68 |
| 9   | 119.66 |
| 10  | 125.47 |
| 10a | 131.12 |
| 10b | 61.00  |
| 11a | 126.97 |
| 11b |        |
| 12  | 133.08 |
| 13  | 27.10  |
| 1'  |        |
| 1a' | 138.49 |
| 2'  | 123.71 |
| 3'  | 122.75 |
| 3a' | 123.55 |
| 4'  | 119.71 |
| 5'  | 119.71 |
| 6'  | 120.12 |
| 7'  | 112.64 |

|     |               |
|-----|---------------|
| 1   | 158.62        |
| 3   | 158.01        |
| 4   | 150.70        |
| 5a  | 84.69         |
| 6a  | 149.93        |
| 7   | 110.58        |
| 8   | 129.68        |
| 9   | 119.65        |
| 10  | 125.47        |
| 10a | 131.11        |
| 10b | 60.97         |
| 11a | 126.94        |
| 11b |               |
| 12  | 133.08        |
| 13  | 27.09         |
| 1'  |               |
| 1a' | 138.47        |
| 2'  | 123.70        |
| 3'  | <b>116.66</b> |
| 3a' | <b>126.29</b> |
| 4'  | <b>120.11</b> |
| 5'  | <b>120.13</b> |
| 6'  | <b>122.76</b> |
| 7'  | 112.63        |

Source : *Heterocycles* **2004**, 63, 1123

confirmed by HMQC, HMBC

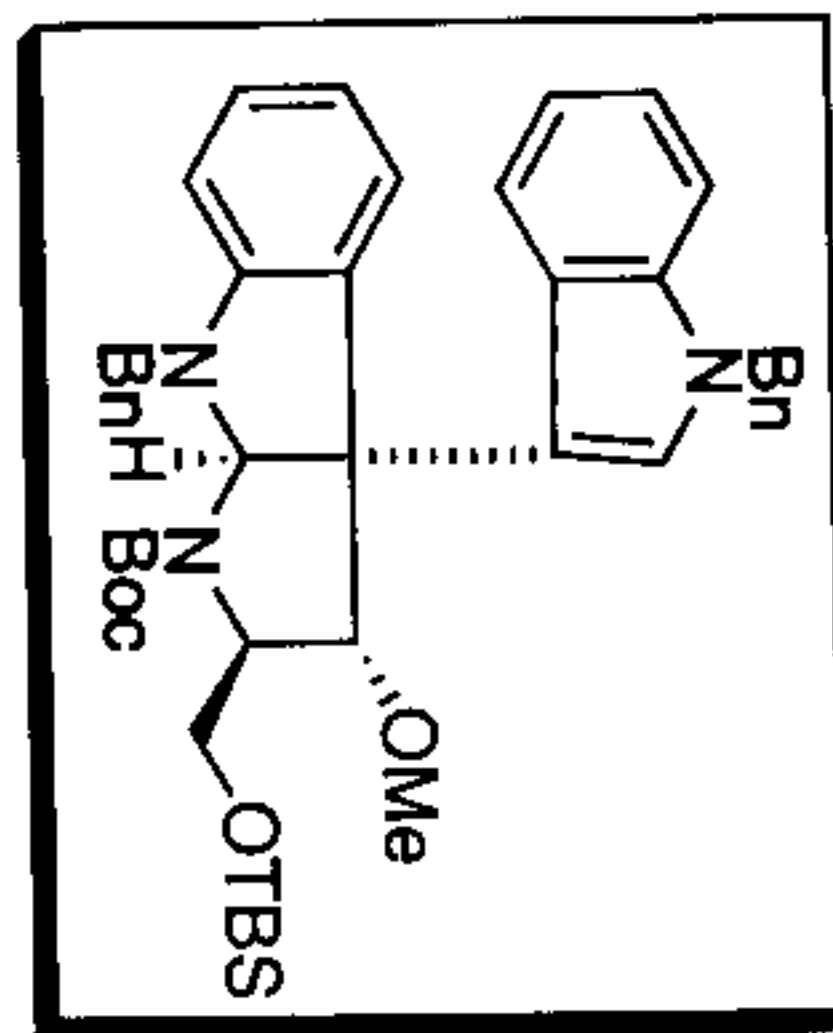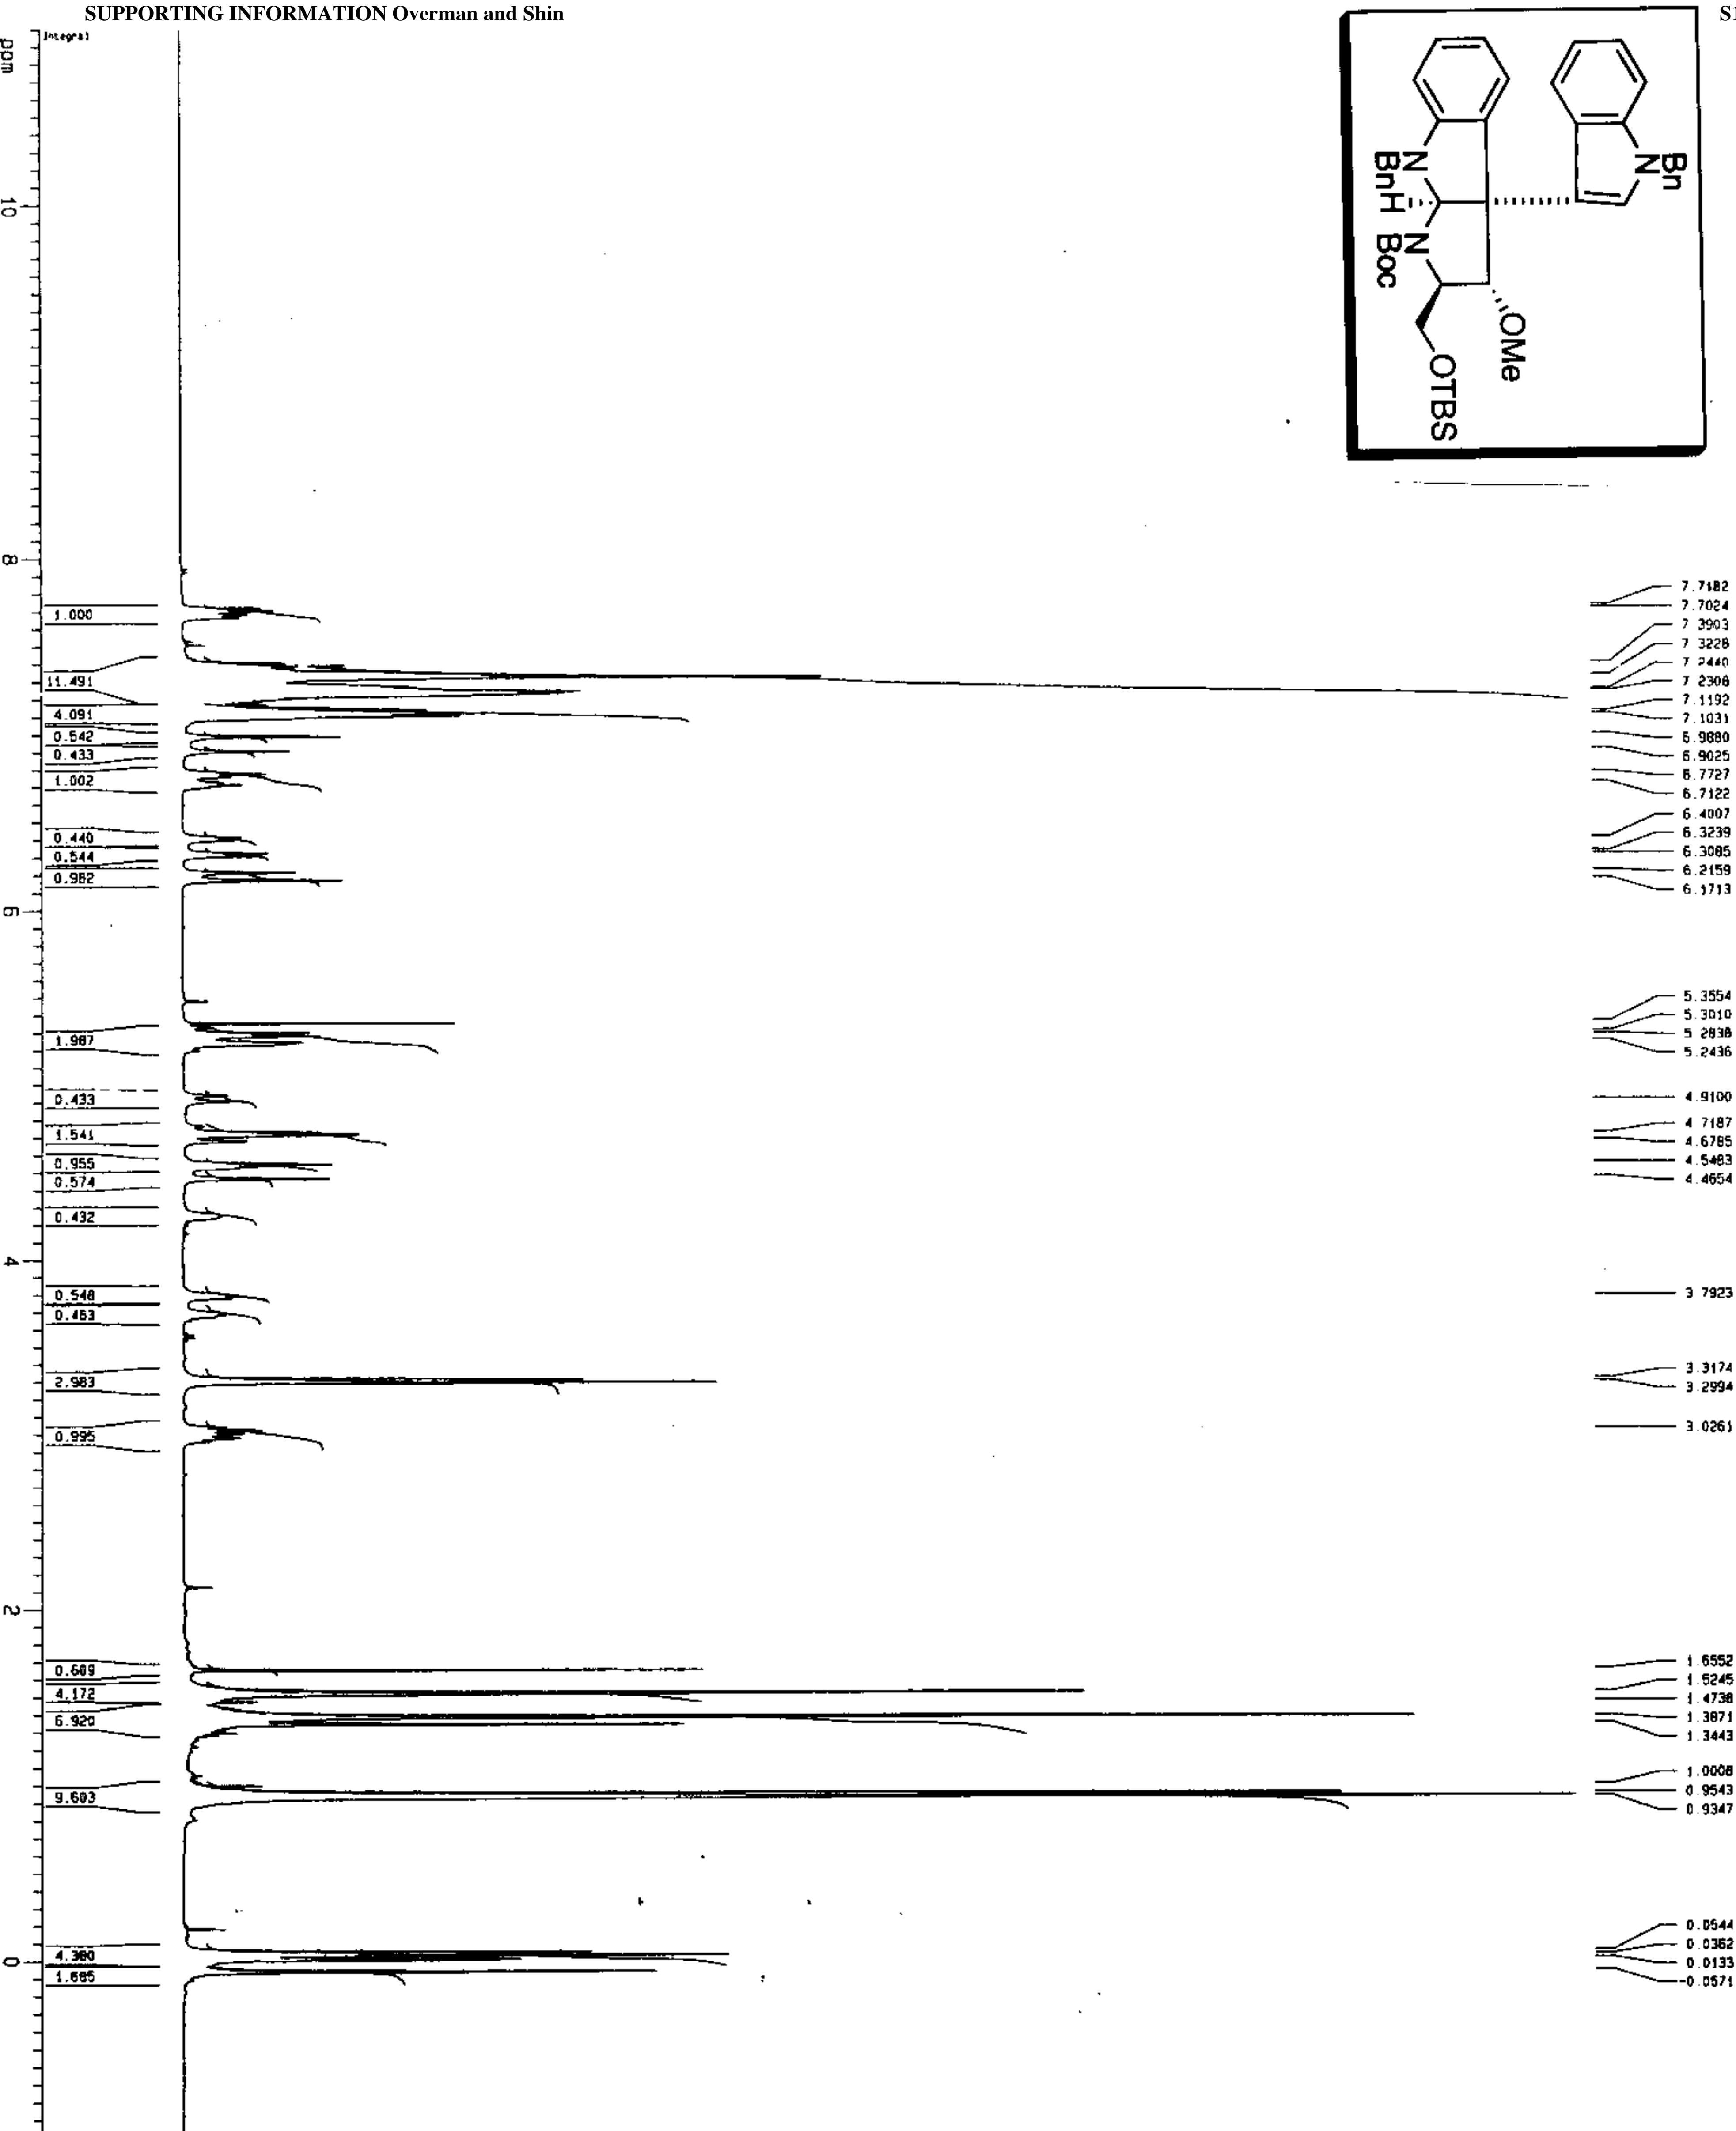

Current Data Parameters  
 USER yshin  
 NAME yshin  
 EXPNO 1  
 PROCNO 1

F2 - Acquisition Parameters  
 Date\_ 20060816  
 Time 17.38  
 INSTRUM cryo500  
 PROBNM 5 mm CPTCI 1H-  
 PULPROG zg30  
 TO 81728  
 SOLVENT CDCl3  
 NS 8  
 DS 2  
 SWH 8012.820 Hz  
 FIDRES 0.098043 Hz  
 AQ 5.0980774 sec  
 RG 5  
 DM 62.400 usec  
 DE 6.00 usec  
 TE 298.0 K  
 D1 0.10000000 sec  
 DCREST 0.00000000 sec  
 MCNRK 0.01500000 sec

\*\*\*\*\* CHANNEL f1 \*\*\*\*\*  
 NUC1 1H  
 P1 8.00 usec  
 PL1 1.60 dB  
 SF01 500.2235015 MHz

F2 - Processing parameters  
 SI 82536  
 SF 500.2200000 MHz  
 WOH EN  
 SSB 0  
 LB 0.30 Hz  
 GB 0  
 PC 4.00

ID plot parameters  
 CX 22.80 cm  
 CY 15.00 cm  
 PIP 11.000 ppm  
 F1 5502.42 Hz  
 F2 -1.000 ppm  
 PPMCM 0.52632 ppm/c  
 HZCM 253.27368 Hz/cm

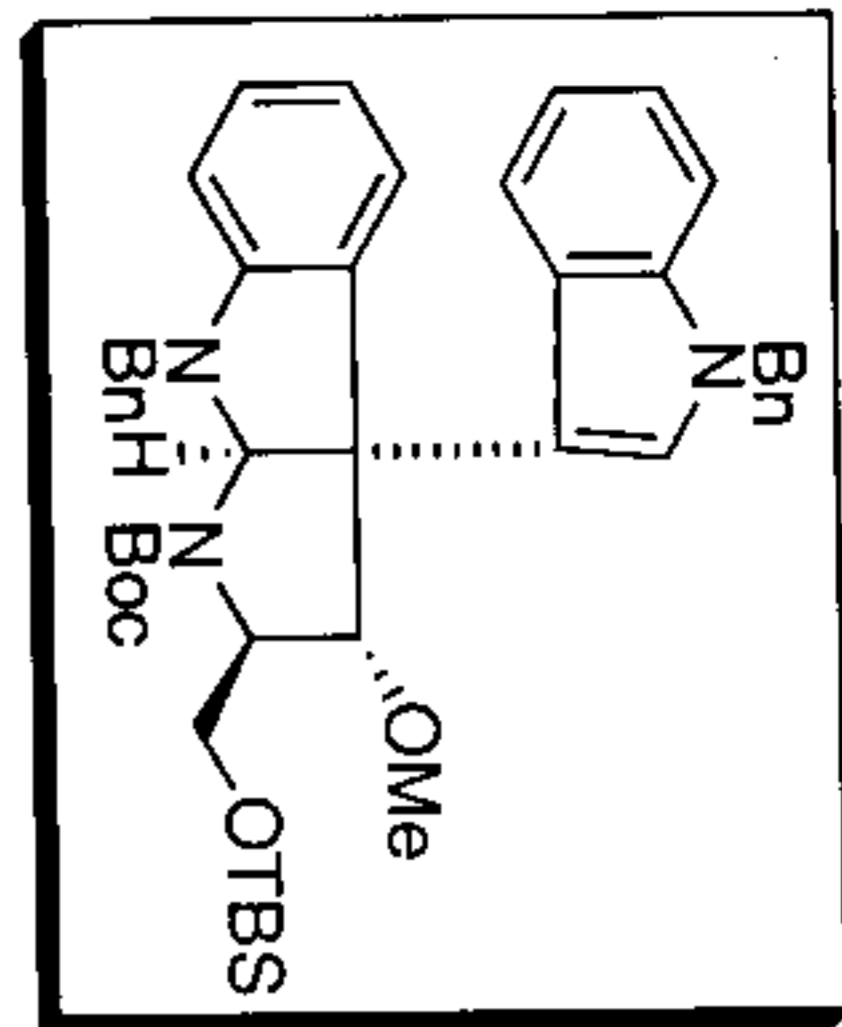

- 154.46
- 148.71
- 139.53
- 139.36
- 137.67
- 137.45
- 131.93
- 128.76
- 128.46
- 128.25
- 127.67
- 127.47
- 127.33
- 126.94
- 126.53
- 126.60
- 126.32
- 124.80
- 124.40
- 122.02
- 121.71
- 121.63
- 119.13
- 119.06
- 117.79
- 117.52
- 115.57
- 109.86
- 109.79
- 107.37
- 107.22
- 88.76
- 88.52
- 87.92
- 87.32
- 80.73
- 80.04
- 77.37
- 77.11
- 75.86
- 66.37
- 66.18
- 63.22
- 62.36
- 60.63
- 59.24
- 57.71
- 50.45
- 50.11
- 29.79
- 28.48
- 28.25
- 25.91
- 18.28
- 18.15
- 5.36
- 5.48
- 5.65

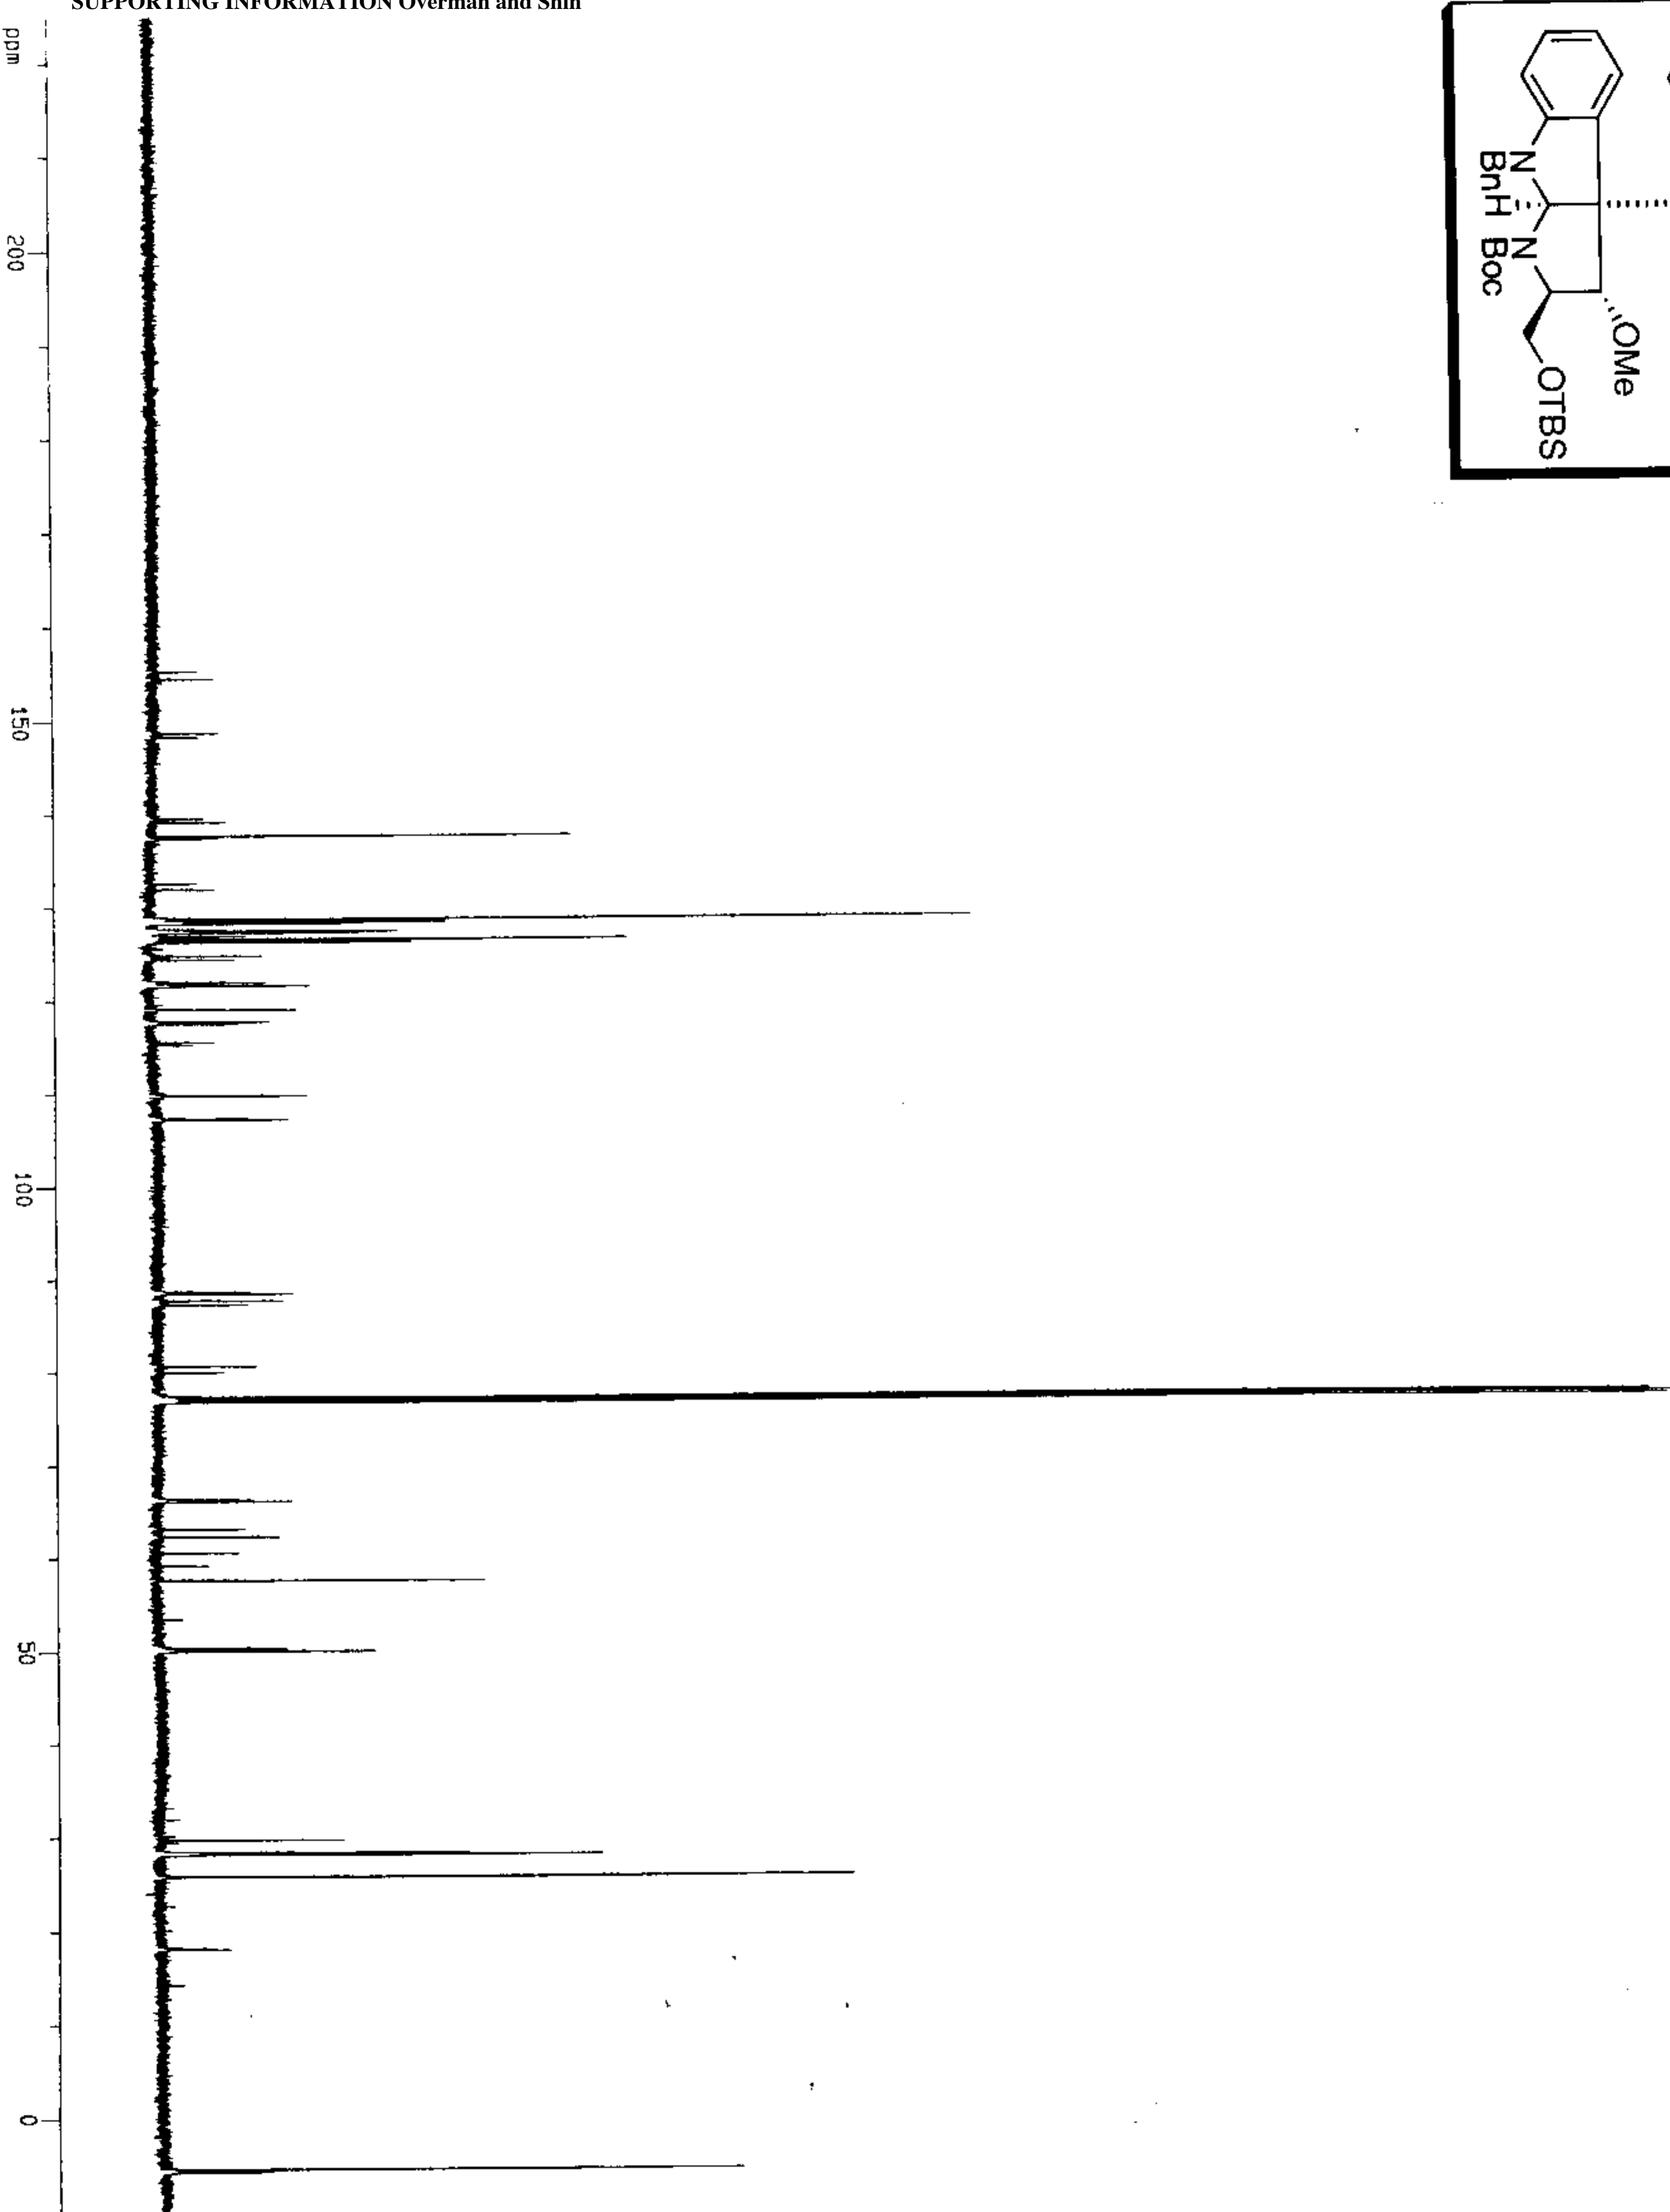

Current Data Parameters  
 USER yashin  
 NAME y55081605  
 EXPNO 3  
 PRGNO 1

F2 - Acquisition Parameters  
 Date\_ 20060816  
 Time 17.41  
 INSTRUM cryo500  
 PROBNM 5 mm CP1C1 1H-  
 PULPROG zgpg30  
 TD 65418  
 SOLVENT CDCl3  
 NS 428  
 DS 4

SI 30303.031 Hz  
 FIDRES 0.463222 Hz  
 AQ 1.0734470 sec  
 RG 11589.2  
 DM 16.500 usec  
 DE 5.00 usec  
 TE 298.0 K

D1 0.25000000 sec  
 d11 0.03000000 sec  
 ACQRES1 0.00000000 sec  
 MCNMRK 0.01500000 sec

----- CHANNEL f1 -----  
 NUC1 <sup>13</sup>C  
 P1 15.00 usec  
 PL1 -1.00 dB  
 SF01 125.7942548 MHz

----- CHANNEL f2 -----  
 CPDPRG2 waltz16  
 NUC2 <sup>1</sup>H  
 PCPD2 100.00 usec  
 PL2 1.60 dB  
 PL12 23.54 dB  
 SF02 500.2225011 MHz

F2 - Processing Parameters  
 SI 65536  
 SF 125.7804190 MHz  
 MDW EN  
 SSB 0  
 LB 1.00 Hz  
 GB 0  
 PC 2.00

1D NMR Plot Parameters  
 CX 22.80 cm  
 CY 15.56 cm  
 F3P 225.000 ppm  
 F1 28300.59 Hz  
 F2P -15.000 ppm  
 F2 -1886.71 Hz  
 PRMCM 10.52632 ppm/cm  
 HZCM 1324.00439 Hz/cm

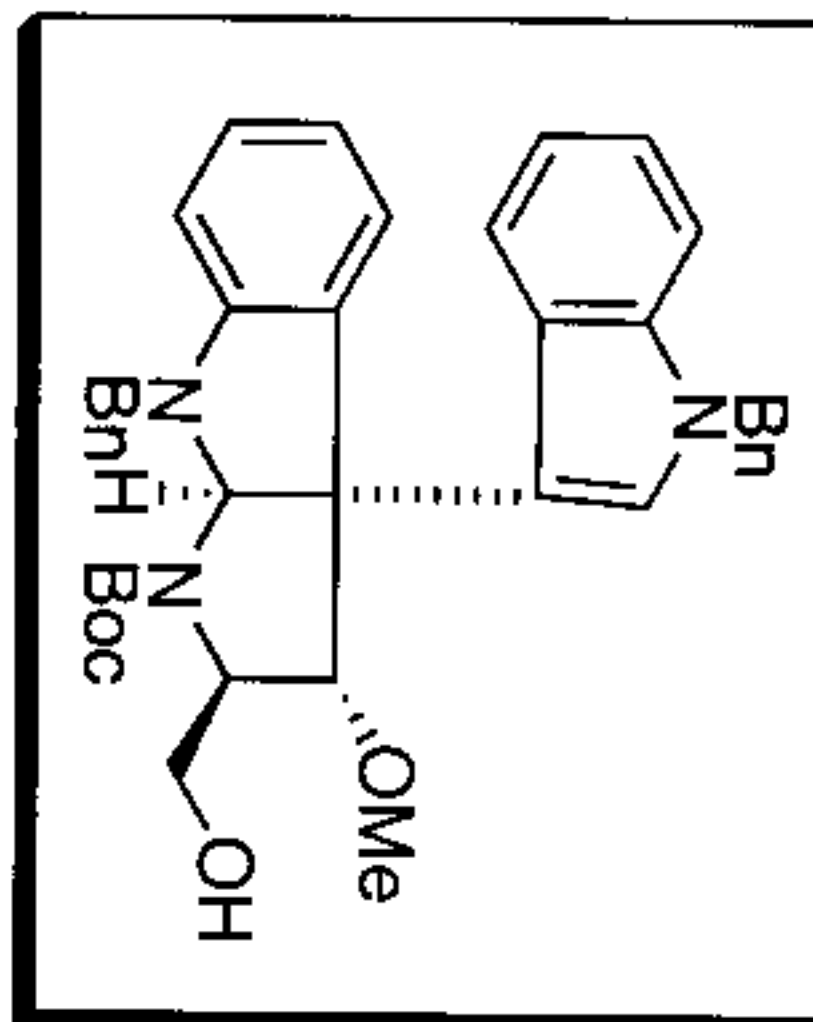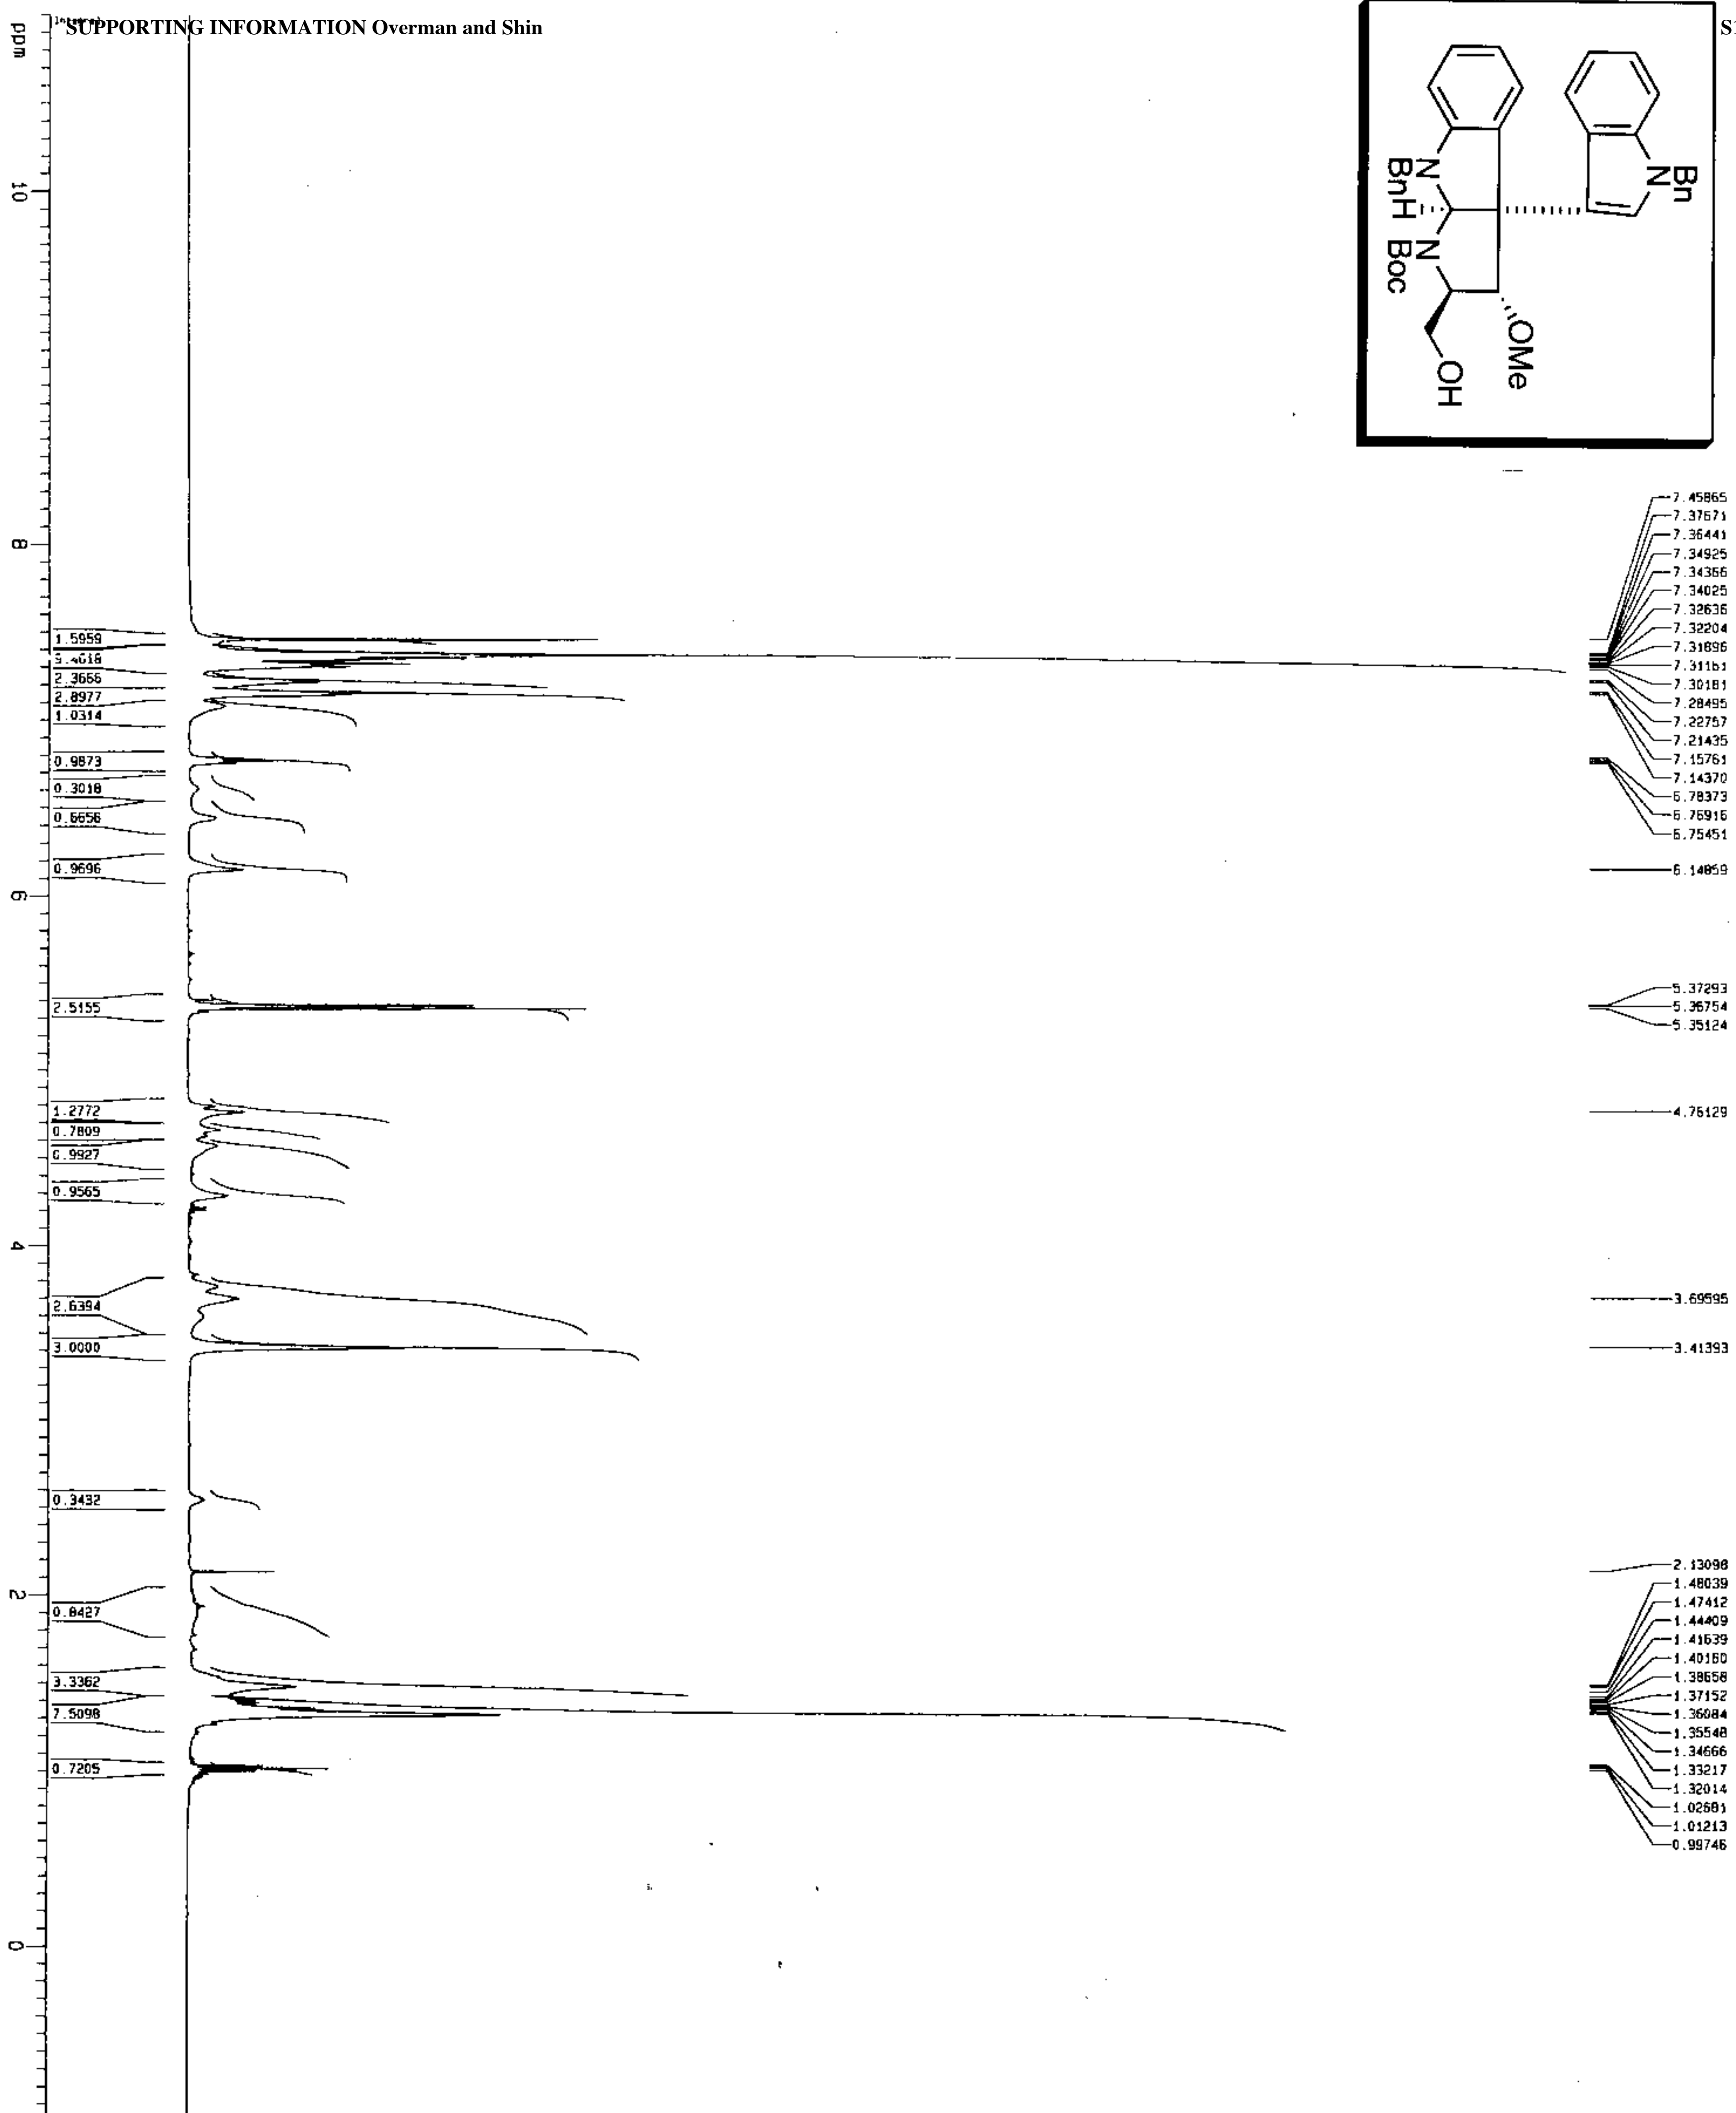

- 7.45865
- 7.37671
- 7.36441
- 7.34925
- 7.34356
- 7.34025
- 7.32636
- 7.32204
- 7.31896
- 7.31161
- 7.30181
- 7.28495
- 7.22757
- 7.21435
- 7.15761
- 7.14370
- 6.78373
- 6.76916
- 6.75451
- 6.14859
- 5.37293
- 5.36754
- 5.35124
- 4.76129
- 3.69595
- 3.41393
- 2.13098
- 1.48039
- 1.47412
- 1.44409
- 1.41639
- 1.40150
- 1.38658
- 1.37152
- 1.36084
- 1.35548
- 1.34666
- 1.33217
- 1.32014
- 1.02681
- 1.01213
- 0.99746

- 1.5959
- 1.4618
- 2.3656
- 2.8977
- 1.0314
- 0.9873
- 0.3018
- 0.6556
- 0.9696
- 2.5155
- 1.2772
- 0.7809
- 0.9927
- 0.9565
- 2.6394
- 3.0000
- 0.3432
- 0.8427
- 3.3362
- 7.5098
- 0.7205

Current Data Parameters  
 USER yashin  
 NAME yashin  
 EXPNO 3  
 PROCNO 1

F2 - Acquisition Parameters  
 Date\_ 20060817  
 Time 13.02  
 INSTRUM cryo500  
 PROBRID 5 mm CP131H-  
 PULPROG zg30  
 TD 81728  
 SOLVENT CDCl3  
 NS 8  
 DS 2  
 SWH 8012.828 Hz  
 FIDRES 0.098043 Hz  
 AQ 5.0999388 sec  
 RG 5  
 DM 62.408 usec  
 DE 6.00 usec  
 TE 298.0 K  
 D1 0.10000000 sec  
 MCREST 0.00000000 sec  
 MCNRC 0.01500000 sec

\*\*\*\*\* CHANNEL f1 \*\*\*\*\*  
 NUC1 1H  
 P1 8.00 usec  
 PL1 1.50 dB  
 SFO1 500.2235015 MHz

F2 - Processing parameters  
 SI 65536  
 SF 500.2200000 MHz  
 WDM EM  
 SSB 0  
 LB 0.30 Hz  
 GB 0  
 PC 4.00

ID NMR plot parameters  
 CX 22.80 cm  
 CY 5.00 cm  
 FIP 11.000 ppm  
 F1 5502.42 Hz  
 F2 -1.000 ppm  
 PPMCM -500.22 Hz  
 HZCM 0.52532 ppm/cm  
 283.27398 Hz/cm

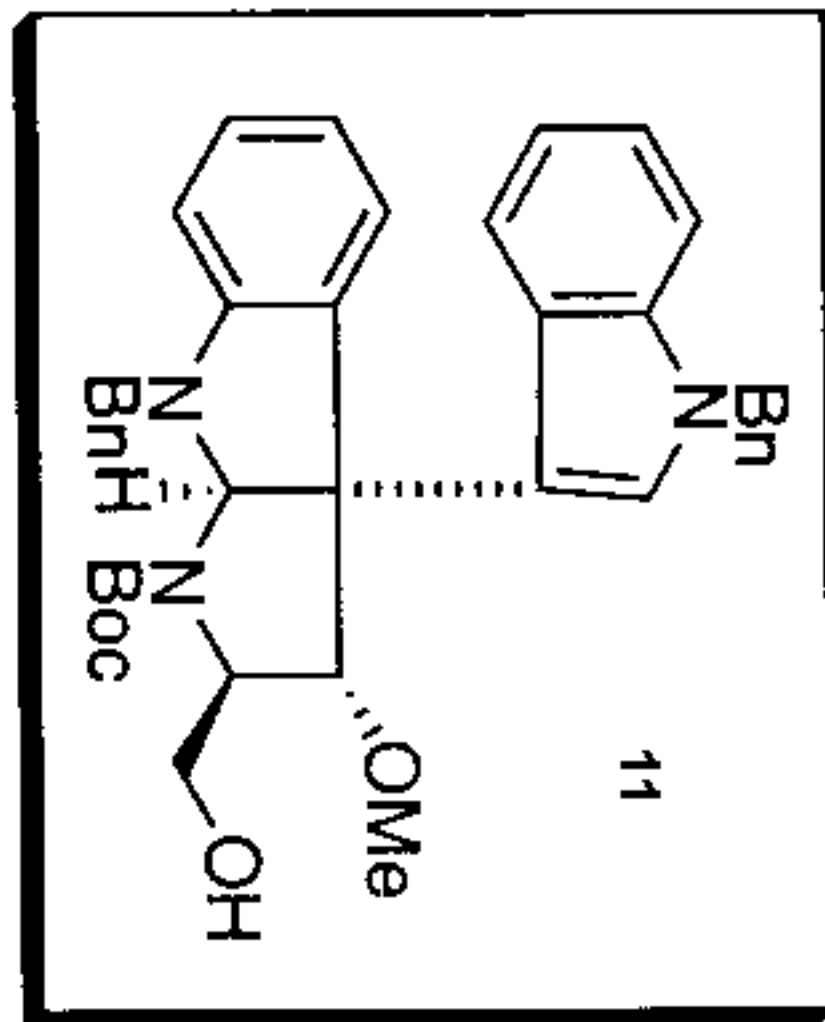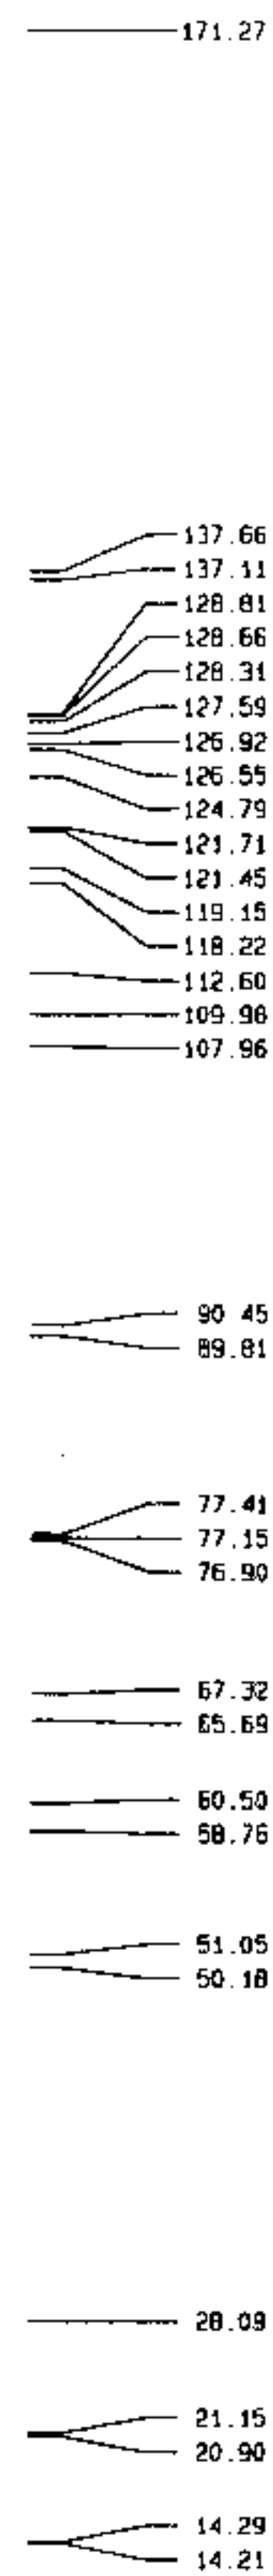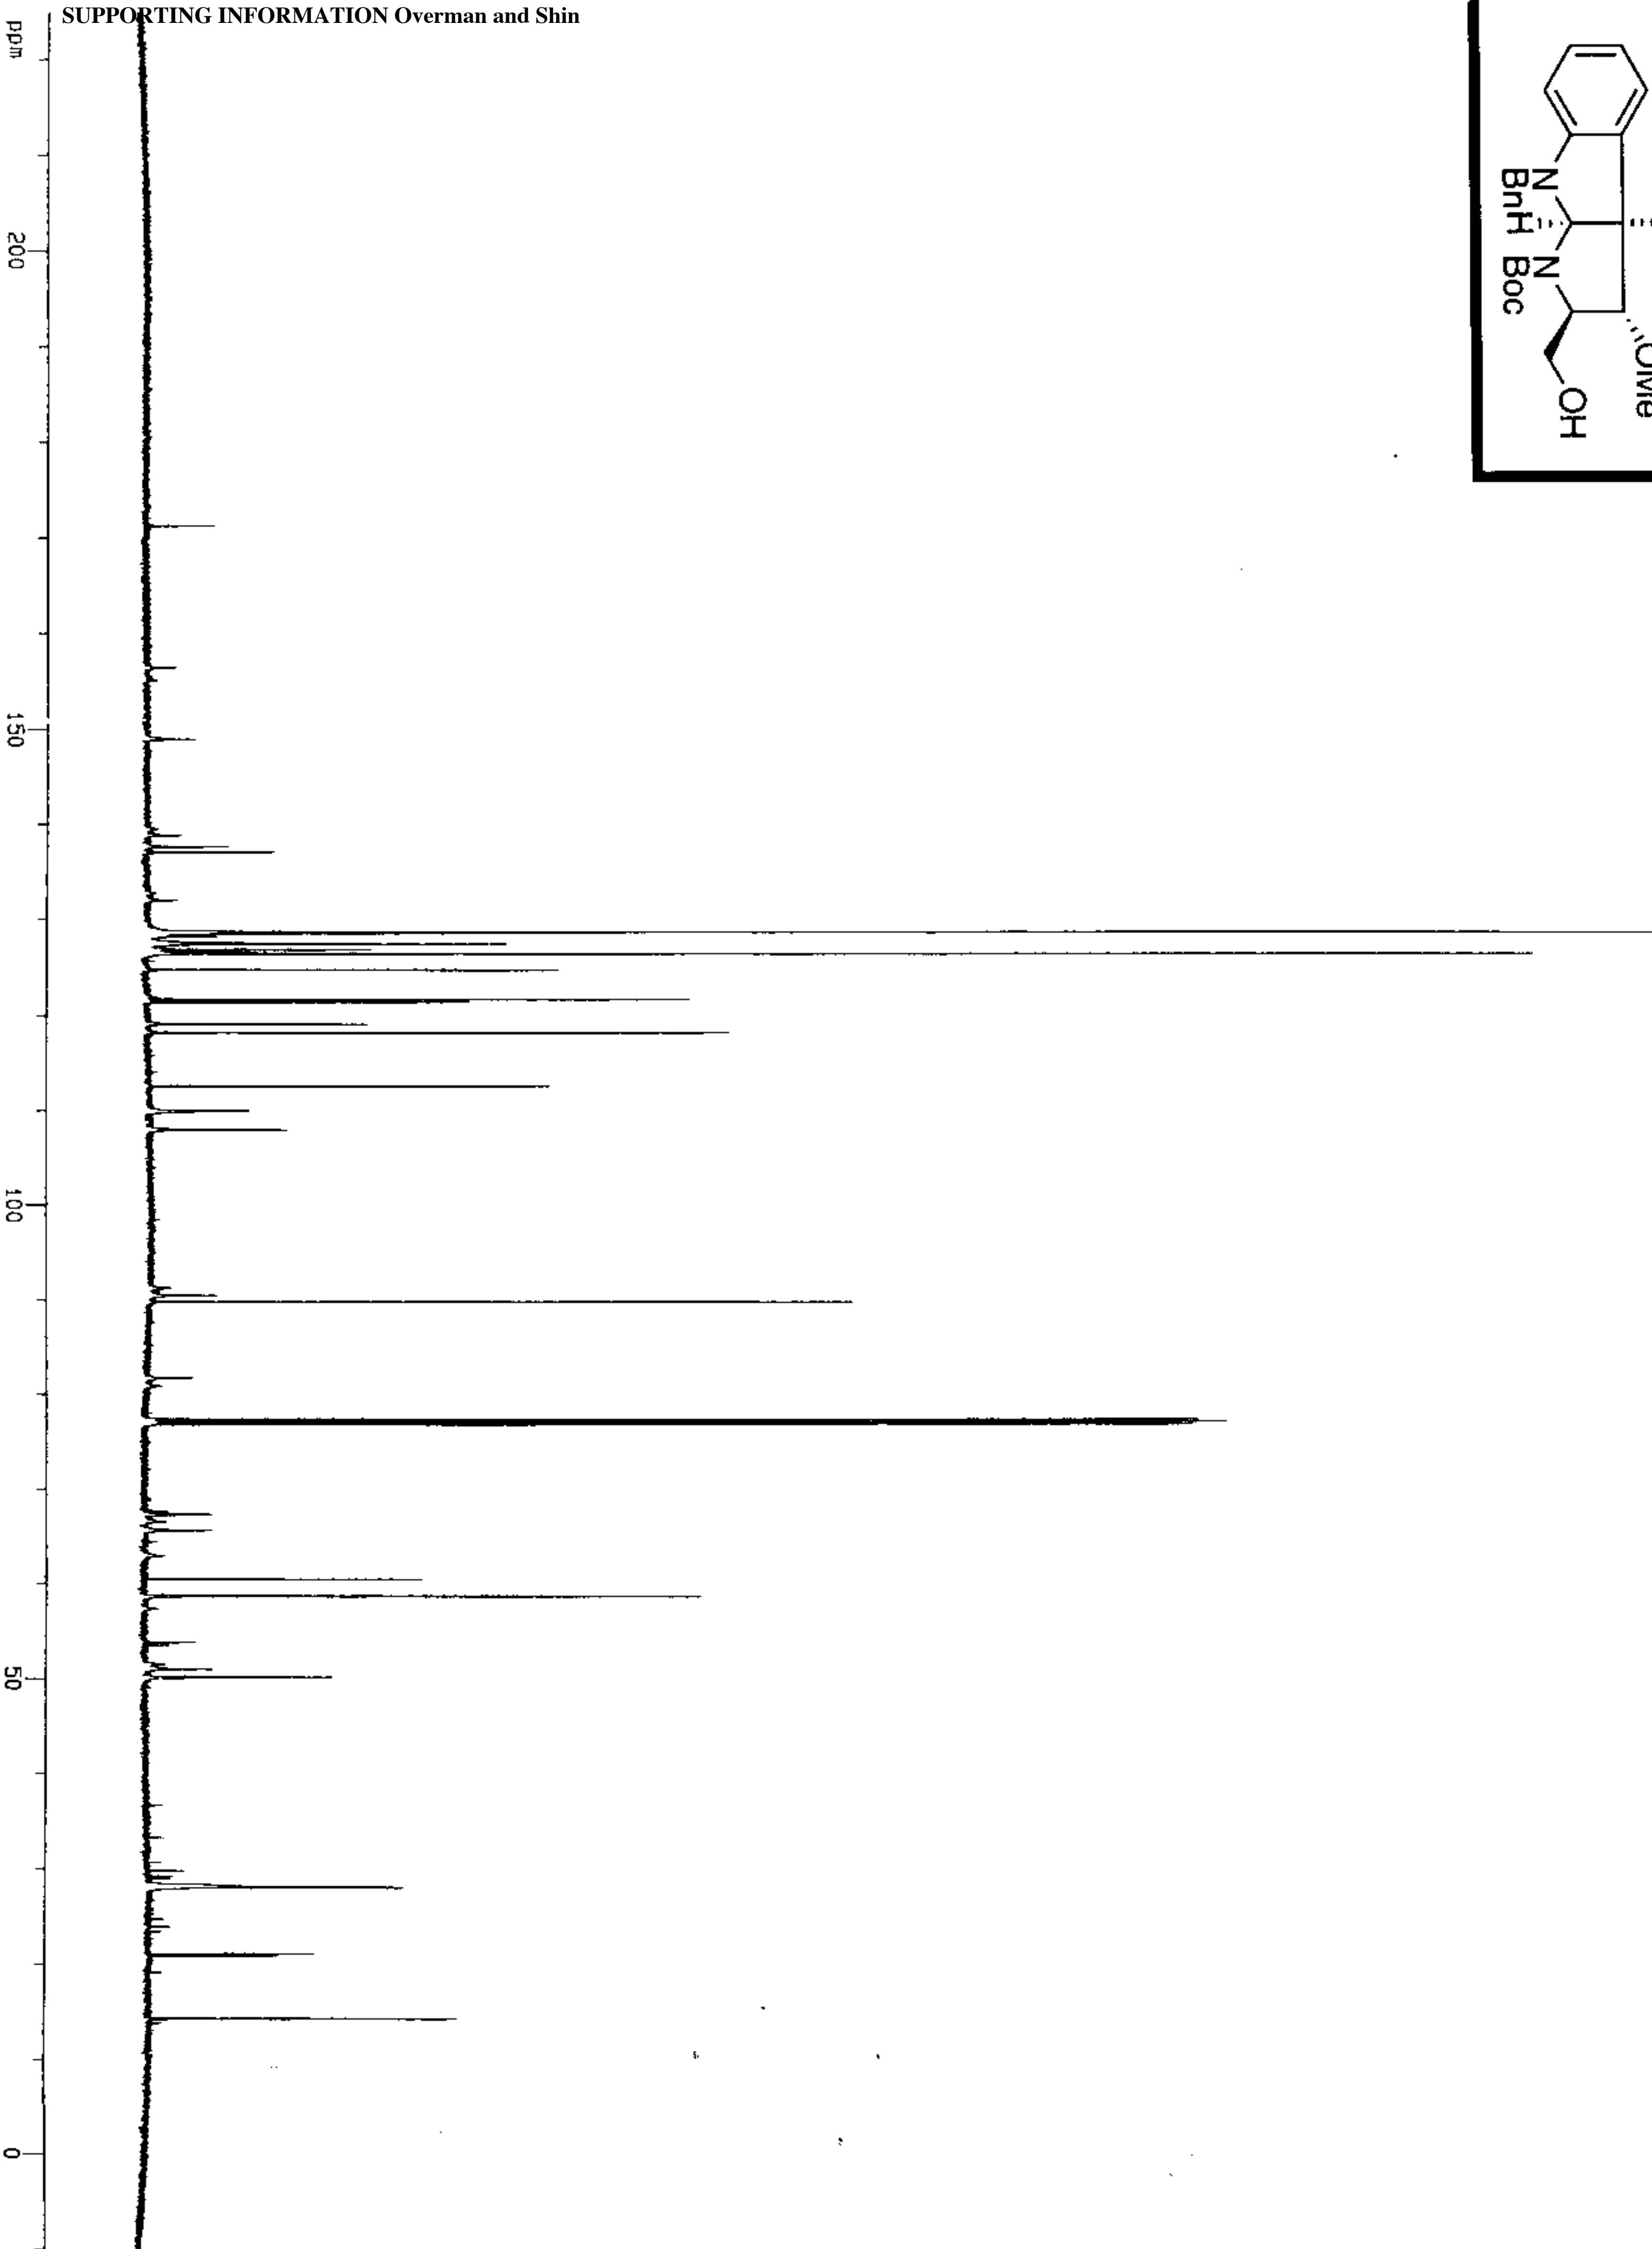

Current Data Parameters  
 USER yssjin  
 NAME yssjin  
 EXPNO 2  
 PROCNO 1

F2 - Acquisition Parameters  
 Date\_ 20080817  
 Time 11.05  
 INSTRUM cryo500  
 PROBNM 5 mm CPTCI 1H-  
 PULPROG zgpg30  
 TD 65536  
 SOLVENT CDCl3  
 NS 683  
 DS 4  
 SWH 30303.031 Hz  
 FIDRES 0.452388 Hz  
 AQ 1.0814105 sec  
 RG 11585.2  
 DW 15.500 usec  
 DE 6.00 usec  
 TE 298.0 K  
 O1 0.25000000 sec  
 O11 0.03000000 sec  
 MCOREST 0.00000000 sec  
 MCORRK 0.01500000 sec

\*\*\*\*\* CHANNEL f1 \*\*\*\*\*  
 NUCL1 <sup>13</sup>C  
 P1 15.00 usec  
 PL1 -1.00 dB  
 SFO1 125.7942948 MHz

\*\*\*\*\* CHANNEL f2 \*\*\*\*\*  
 CPDPRG2 waltz16  
 NUCL2 <sup>1</sup>H  
 PCPD2 100.00 usec  
 PL2 1.60 dB  
 PL12 23.54 dB  
 SFO2 500.2225011 MHz

F2 - Processing parameters  
 SI 65536  
 SF 125.7804190 MHz  
 MDW 0  
 SSB 0  
 LB 1.00 Hz  
 GB 0  
 PC 2.00

ID NMR plot parameters  
 CX 22.80 cm  
 CY 15.65 cm  
 F1P 225.000 ppm  
 F1 28300.58 Hz  
 F2P -15.000 ppm  
 F2 -1886.71 Hz  
 PRMCH 10.52632 ppm/cm  
 HZCM 1324.00439 Hz/cm

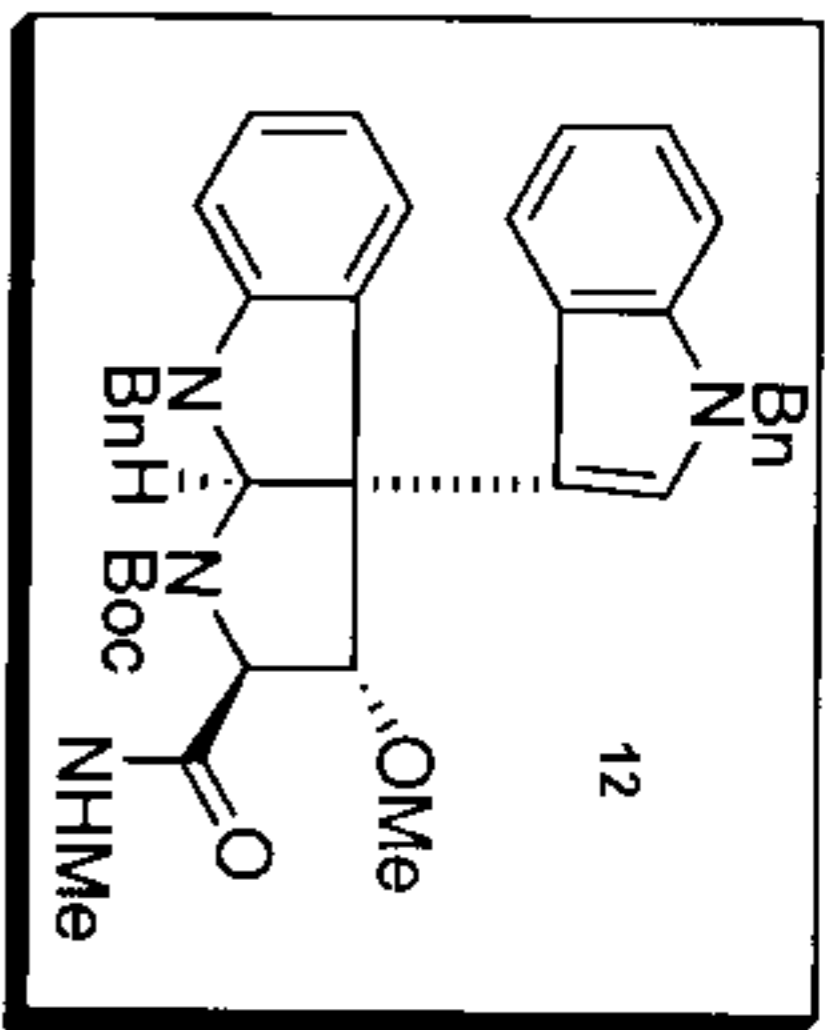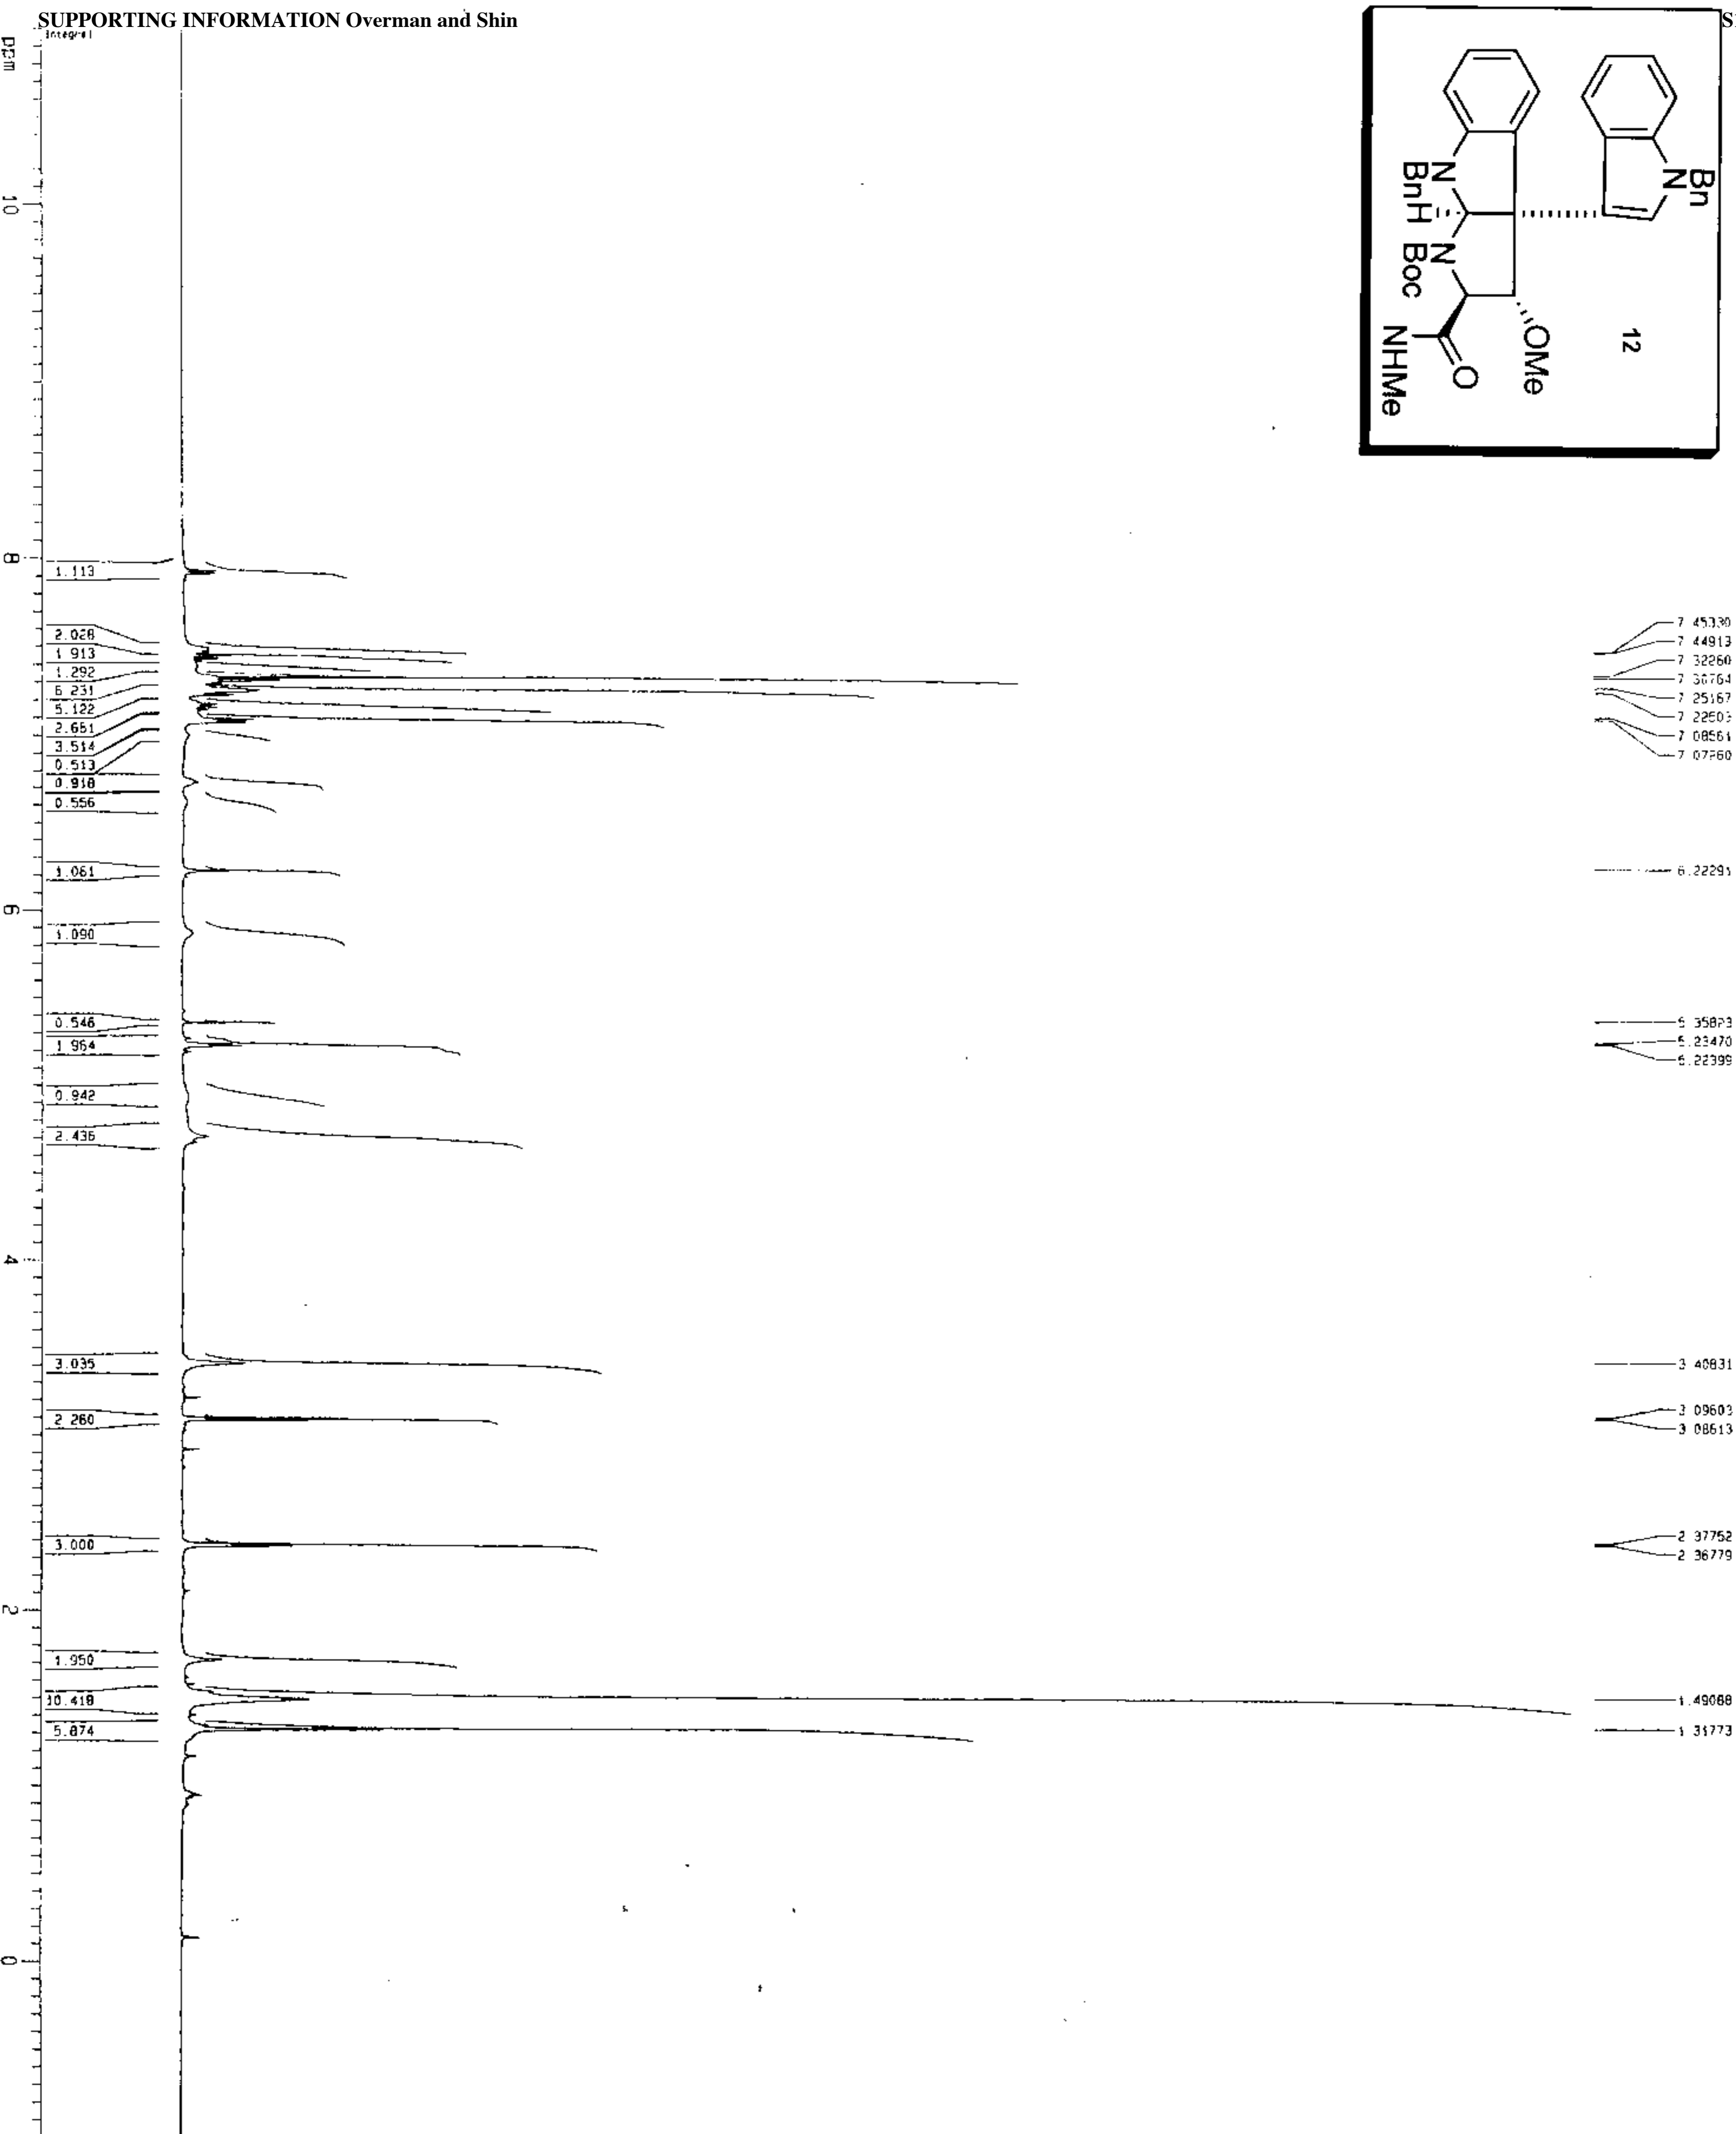

Current Data Parameters  
 USER ysshin  
 EXPNO 1  
 PROCNO 1

F2 - Acquisition Parameters  
 Date\_ 20060821  
 Time 19.36  
 INSTRUM cryo500  
 PROBRD 5 mm OPTCI 1H-  
 PULPROG zg30  
 TD 81728  
 SOLVENT CDCl3  
 NS 8  
 DS 2  
 SWH 8012.830 Hz  
 FIDRES 0.098043 Hz  
 AQ 5.0930774 sec  
 RG 5.7  
 OW 62.400 usec  
 DE 6.00 usec  
 TE 298.0 K  
 DI 0.10000000 sec  
 MCREST 0.00000000 sec  
 MCNPRK 0.015000000 sec

\*\*\*\*\* CHANNEL f1 \*\*\*\*\*  
 NUCl1 1H  
 P1 8.00 usec  
 PL1 1.50 dB  
 SFO1 500.2235015 MHz

F2 - Processing parameters  
 SI 65536  
 SF 500.2200000 MHz  
 MDX EM  
 SSB 0  
 LB 0.30 Hz  
 GB 0  
 PC 4.00

1D NMR plot parameters  
 CX 22.80 cm  
 CY 3.00 cm  
 F1P 11.000 DPM  
 F1 5502.42 Hz  
 F2P -1.000 DPM  
 F2 -500.22 Hz  
 PPMCM 0.58632 DPM/cm  
 HZCM 263.27368 Hz/cm

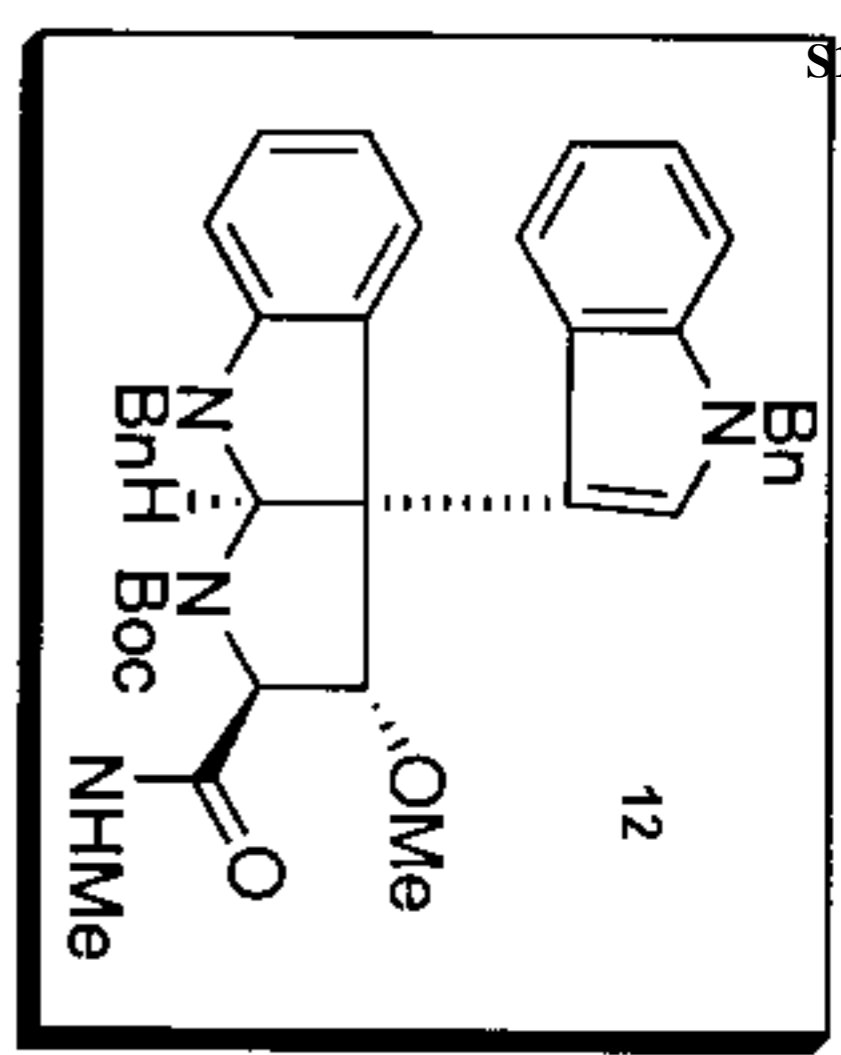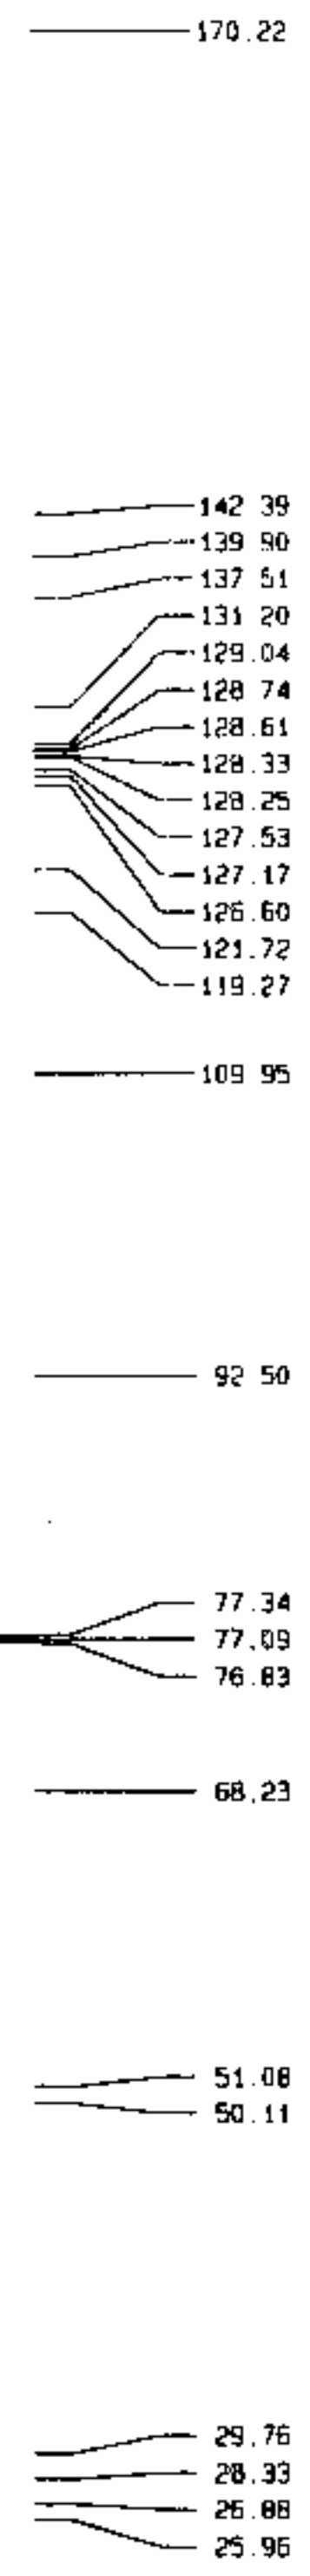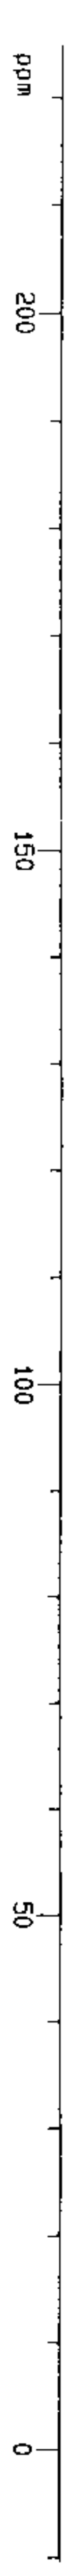

Current Data Parameters  
 USER yssb1n  
 NAME yss082106  
 EXPNO 3  
 PROCNO 1

F2 - Acquisition Parameters  
 Date\_ 20060821  
 Time 10.45  
 INSTRUM cryo500  
 PROBNM 5 mm CP1CI 1H-  
 PULPROG zgpg30  
 TD 65418  
 SOLVENT CDCl3  
 NS 1024  
 DS 4  
 SWH 30303.031 HZ  
 FIDRES 0.463222 HZ  
 AD 1.0794535 sec  
 RG 13004  
 DM 15.500 usec  
 DE 6.00 usec  
 TE 298.0 K  
 D1 0.25000000 sec  
 d11 0.03000000 sec  
 MCRST 0.00000000 sec  
 MCRNK 0.01500000 sec

\*\*\*\*\* CHANNEL f1 \*\*\*\*\*  
 NUCL1 13C  
 P1 15.00 usec  
 PL1 -1.00 dB  
 SFO1 125.7942548 MHz

\*\*\*\*\* CHANNEL f2 \*\*\*\*\*  
 CPDPRG2 waltz16  
 NUC2 1H  
 PCPD2 100.00 usec  
 PL2 1.60 dB  
 PL12 23.54 dB  
 SF02 500.2258011 MHz

F2 - Processing Parameters  
 SI 65536  
 SF 125.7804190 MHz  
 MDW EM  
 SSB 0  
 LB 1.00 HZ  
 GB 0  
 PC 2.00

1D NMR Plot Parameters  
 CX 22.80 cm  
 CY 50.00 cm  
 F1P 225.000 ppm  
 F1 28306.59 Hz  
 F2P -15.000 ppm  
 F2 -1886.71 Hz  
 PPMCM 10.52832 ppm/cm  
 HZCM 1324.00438 Hz/cm



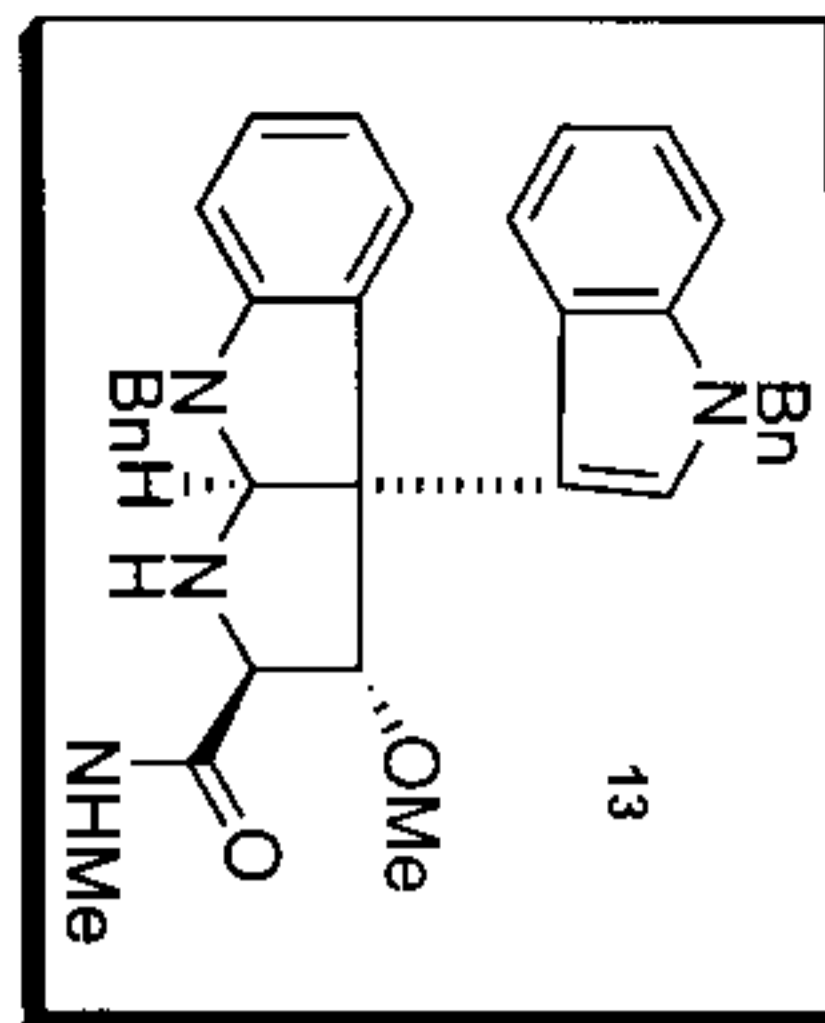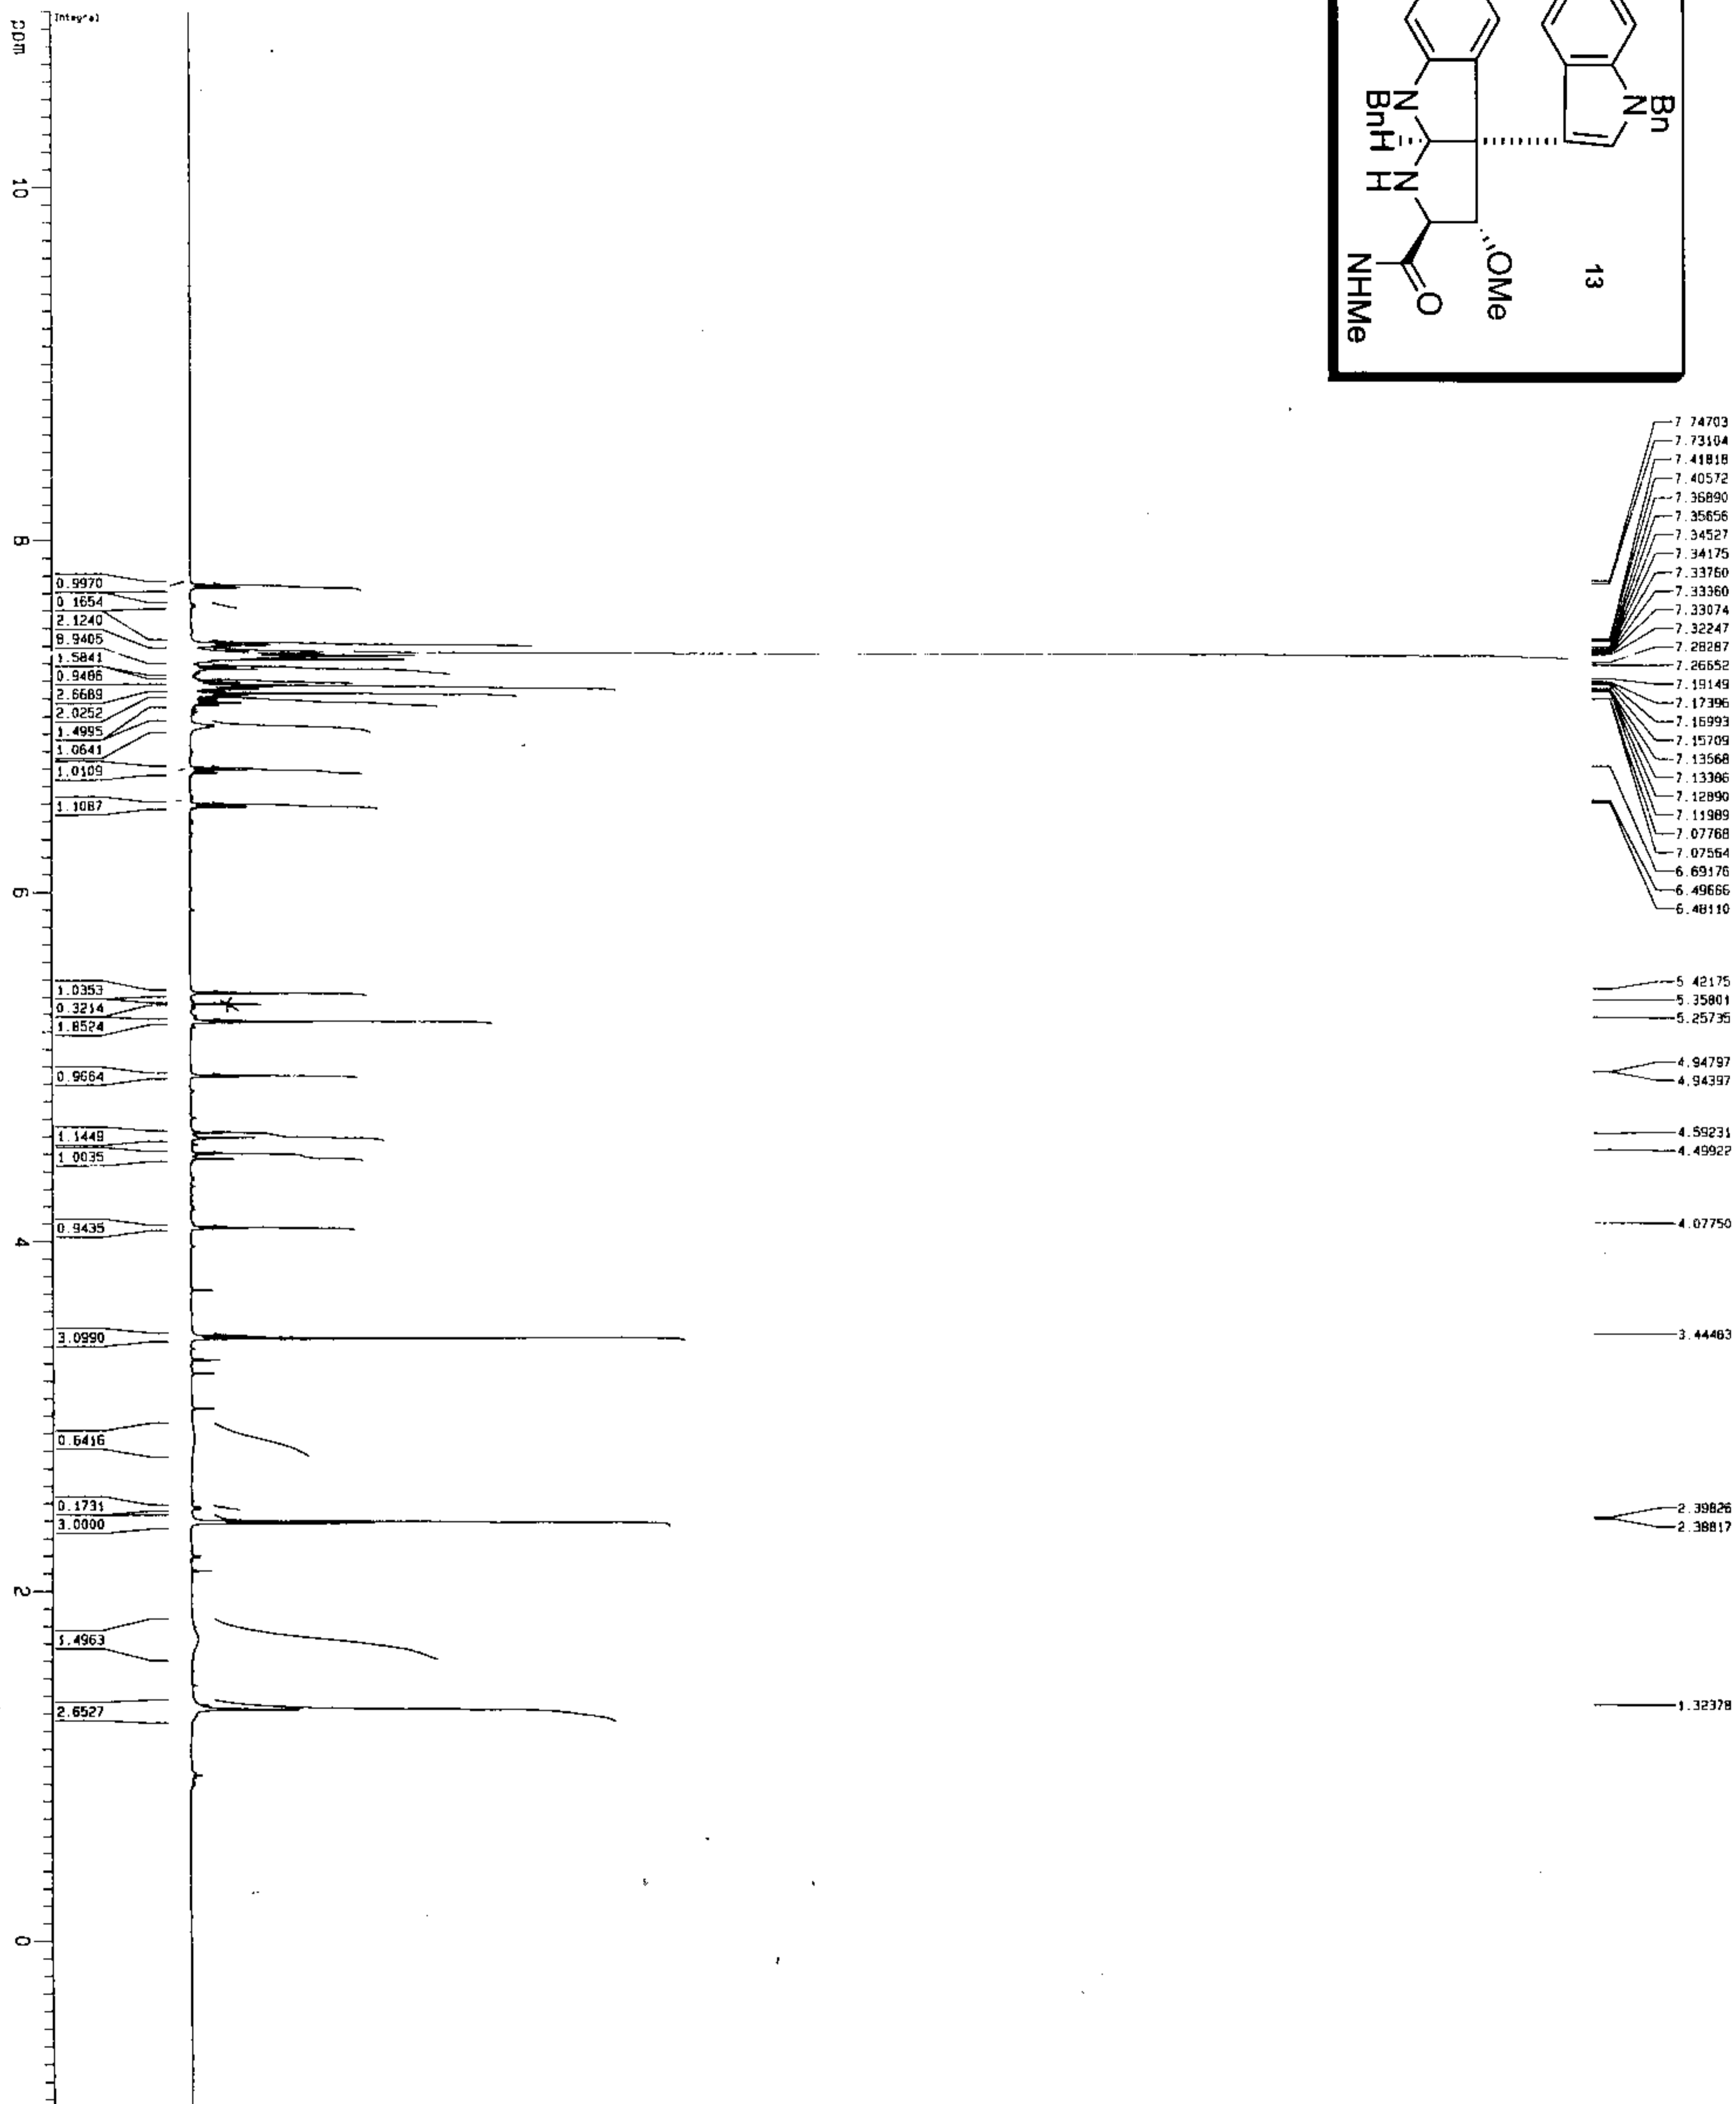

Current Data Parameters  
 USER ysshin  
 NAME ys082106  
 EXPNO 4  
 PROCNO 1

F2 - Acquisition Parameters  
 Date\_ 20060821  
 Time 17.45  
 INSTRUM cryo500  
 PROBRID 5 mm CP1CI 1H-  
 PULPROG zg30  
 TD 81728  
 SOLVENT CDCl3  
 NS 8  
 DS 2  
 SMI 012.820 Hz  
 FIDRES 0.098043 Hz  
 AQ 5.05993398 sec  
 RG 5  
 DM 62.400 usec  
 DE 5.00 usec  
 TE 298.0 K  
 O1 0.10000000 sec  
 MCREST 0.00000000 sec  
 MCNRC 0.01500000 sec

----- CHANNEL f1 -----  
 NUC1 1H  
 P1 8.08 usec  
 PL1 1.60 dB  
 SF01 500.2235015 MHz

F2 - Processing parameters  
 SI 65536  
 SF 500.2200000 MHz  
 NDM EM  
 SSB 0  
 LB 0.30 Hz  
 GB 0  
 PC 4.00

ID NMR plot parameters  
 CX 22.80 cm  
 CY 5.00 cm  
 FIP 11.000 ppm  
 F1 5502.42 Hz  
 F2 -1.000 ppm  
 F2 500.22 Hz  
 PPKWH 0.52632 ppm/cm  
 HZCM 263.27368 Hz/cm

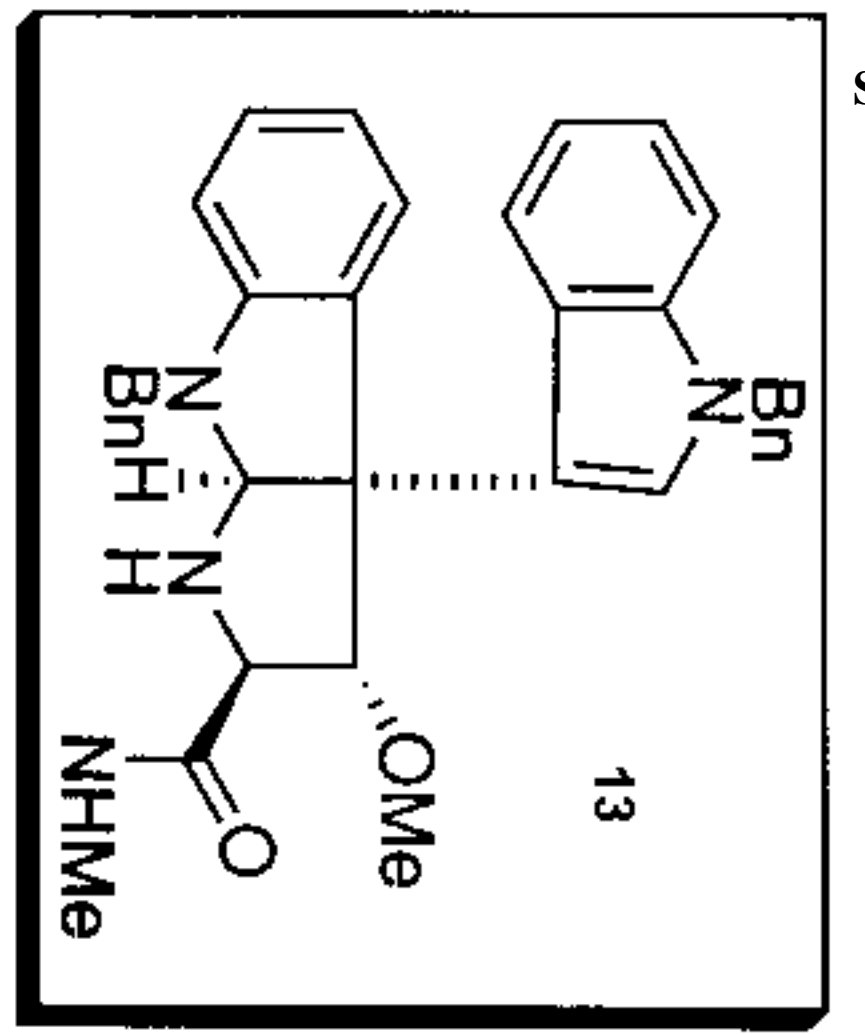

- 172.59
- 148.84
- 138.11
- 137.41
- 137.15
- 132.36
- 128.84
- 128.77
- 128.75
- 128.67
- 127.99
- 127.63
- 127.41
- 127.07
- 126.32
- 125.02
- 121.57
- 121.03
- 119.13
- 118.54
- 114.55
- 109.87
- 107.22
- 90.71
- 89.01
- 77.35
- 77.08
- 76.84
- 67.56
- 59.68
- 58.07
- 50.10
- 49.89
- 29.77
- 25.52

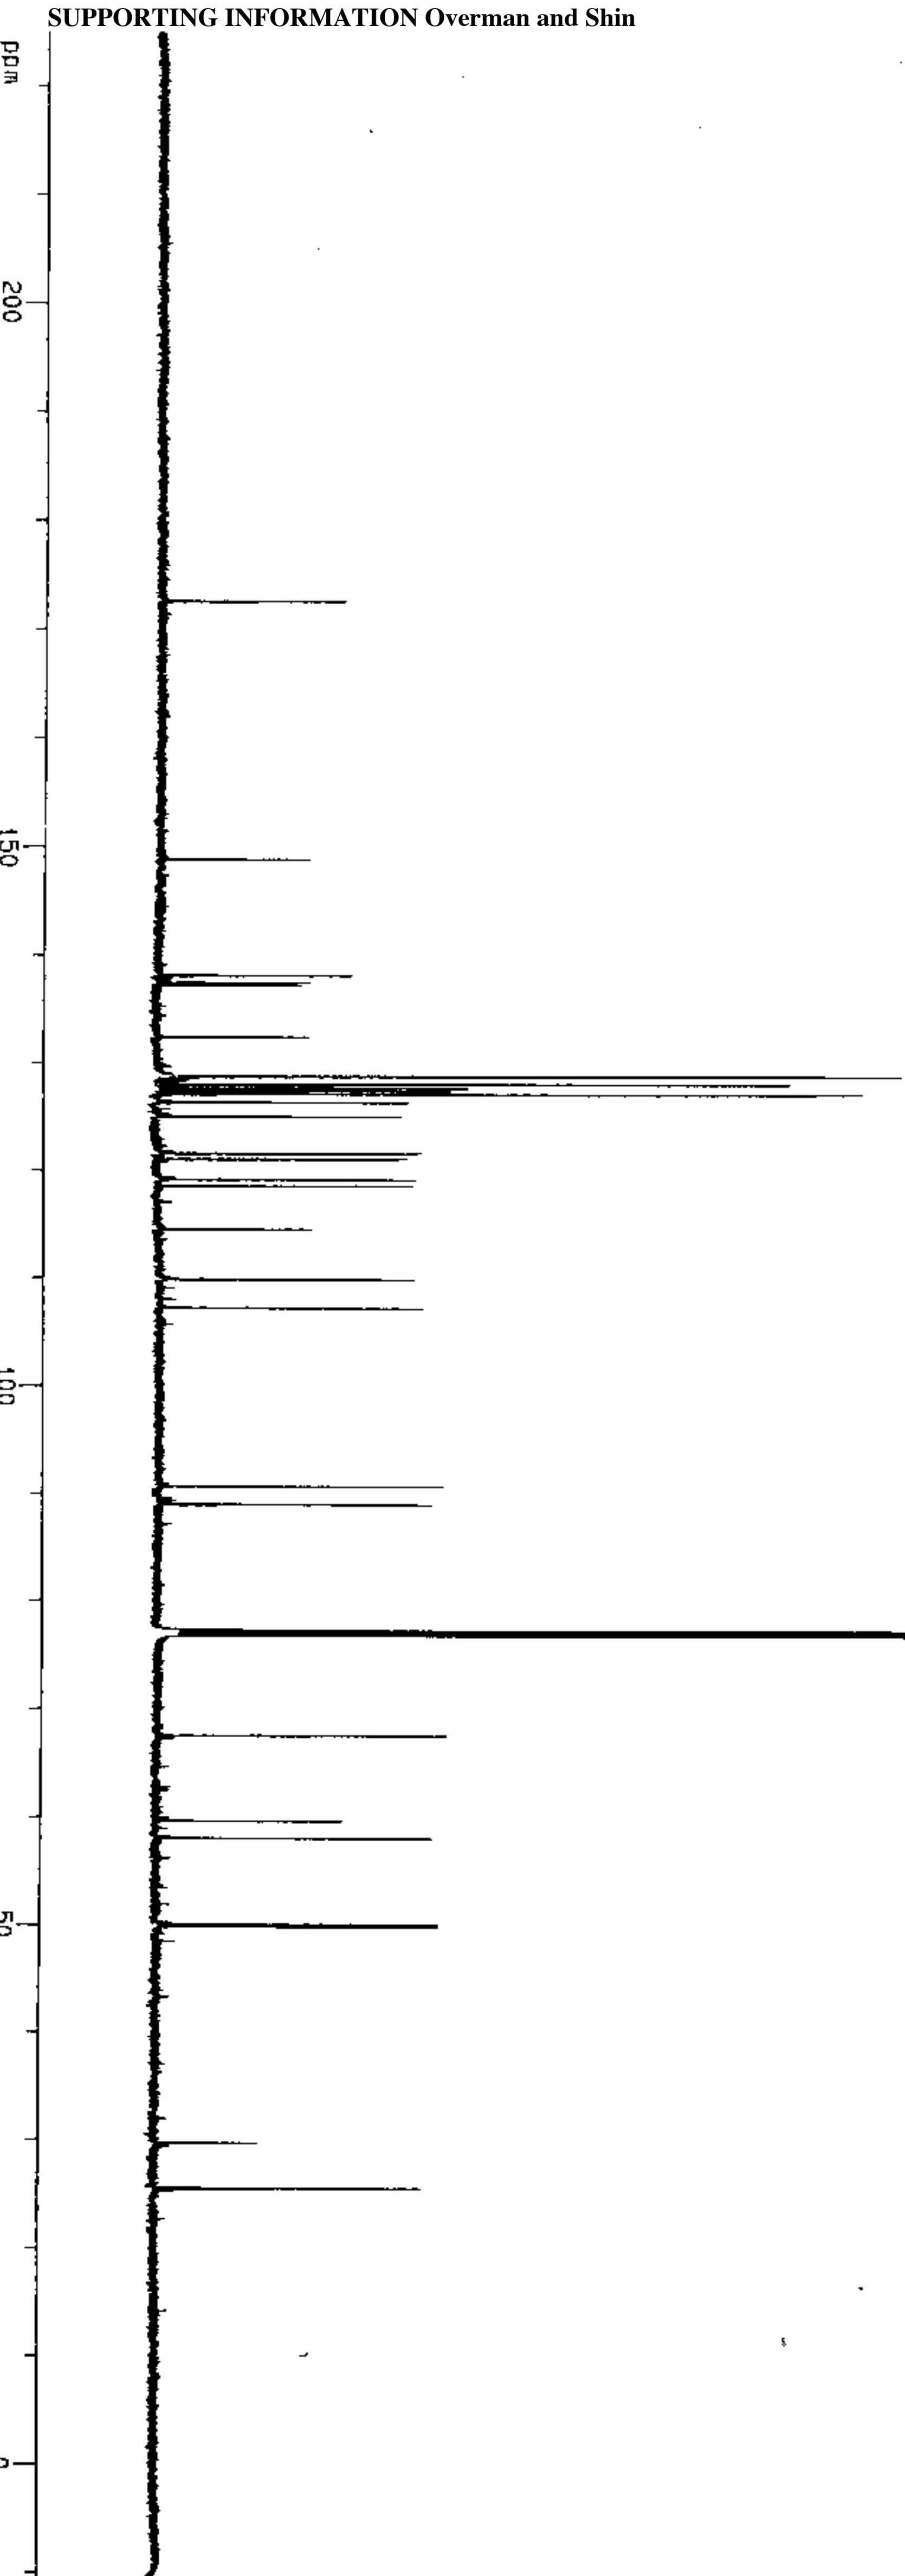

Current Data Parameters  
 USER yssrjn  
 NAME yss02106  
 EXPNO 6  
 PROCNO 1

F2 - Acquisition Parameters  
 Date\_ 20080821  
 Time 18:18  
 INSTRUM cryo500  
 PROBRD 5 mm CPTCI 1H-  
 PULPROG zgpg30  
 TD 65418  
 SOLVENT CDCl3  
 NS 1159  
 DS 4  
 SMH 30303.031 Hz  
 FIDRES 0.463222 Hz  
 AQ 1.0794835 sec  
 RG 13004  
 DM 16.500 Usec  
 DE 6.00 Usec  
 TE 298.0 K  
 D1 0.25000000 sec  
 D11 0.03000000 sec  
 MCREST 0.00000000 sec  
 MCMRK 0.01500000 sec

\*\*\*\*\* CHANNEL f1 \*\*\*\*\*  
 NUC1 13C  
 P1 15.00 Usec  
 PL1 -1.00 dB  
 SF01 125.7642948 MHz

\*\*\*\*\* CHANNEL f2 \*\*\*\*\*  
 CPDPRG2 waltz16  
 NUC2 1H  
 PCPD2 100.00 Usec  
 PL2 1.50 dB  
 PL12 23.54 dB  
 SF02 500.2225011 MHz

F2 - Processing parameters  
 SI 65536  
 SF 125.7604190 MHz  
 WDM EM  
 SSB 0  
 LB 1.00 Hz  
 GB 0  
 PC 2.00

1D NMR Plot Parameters  
 CX 22.80 CM  
 CY 15.65 CM  
 F1P 225.000 ppm  
 F1 28300.58 Hz  
 F2P -15.000 ppm  
 F2 -1886.71 Hz  
 PPMCM 10.52632 ppm/cm  
 HZCM 1324.00439 Hz/cm

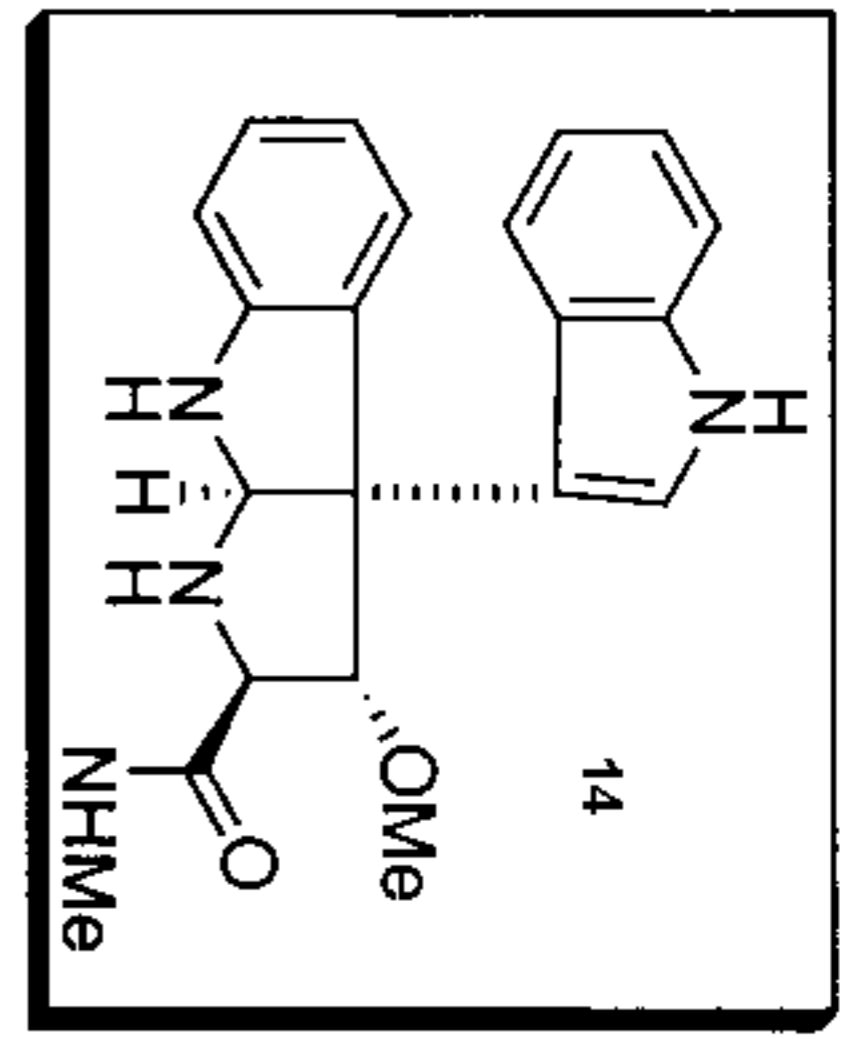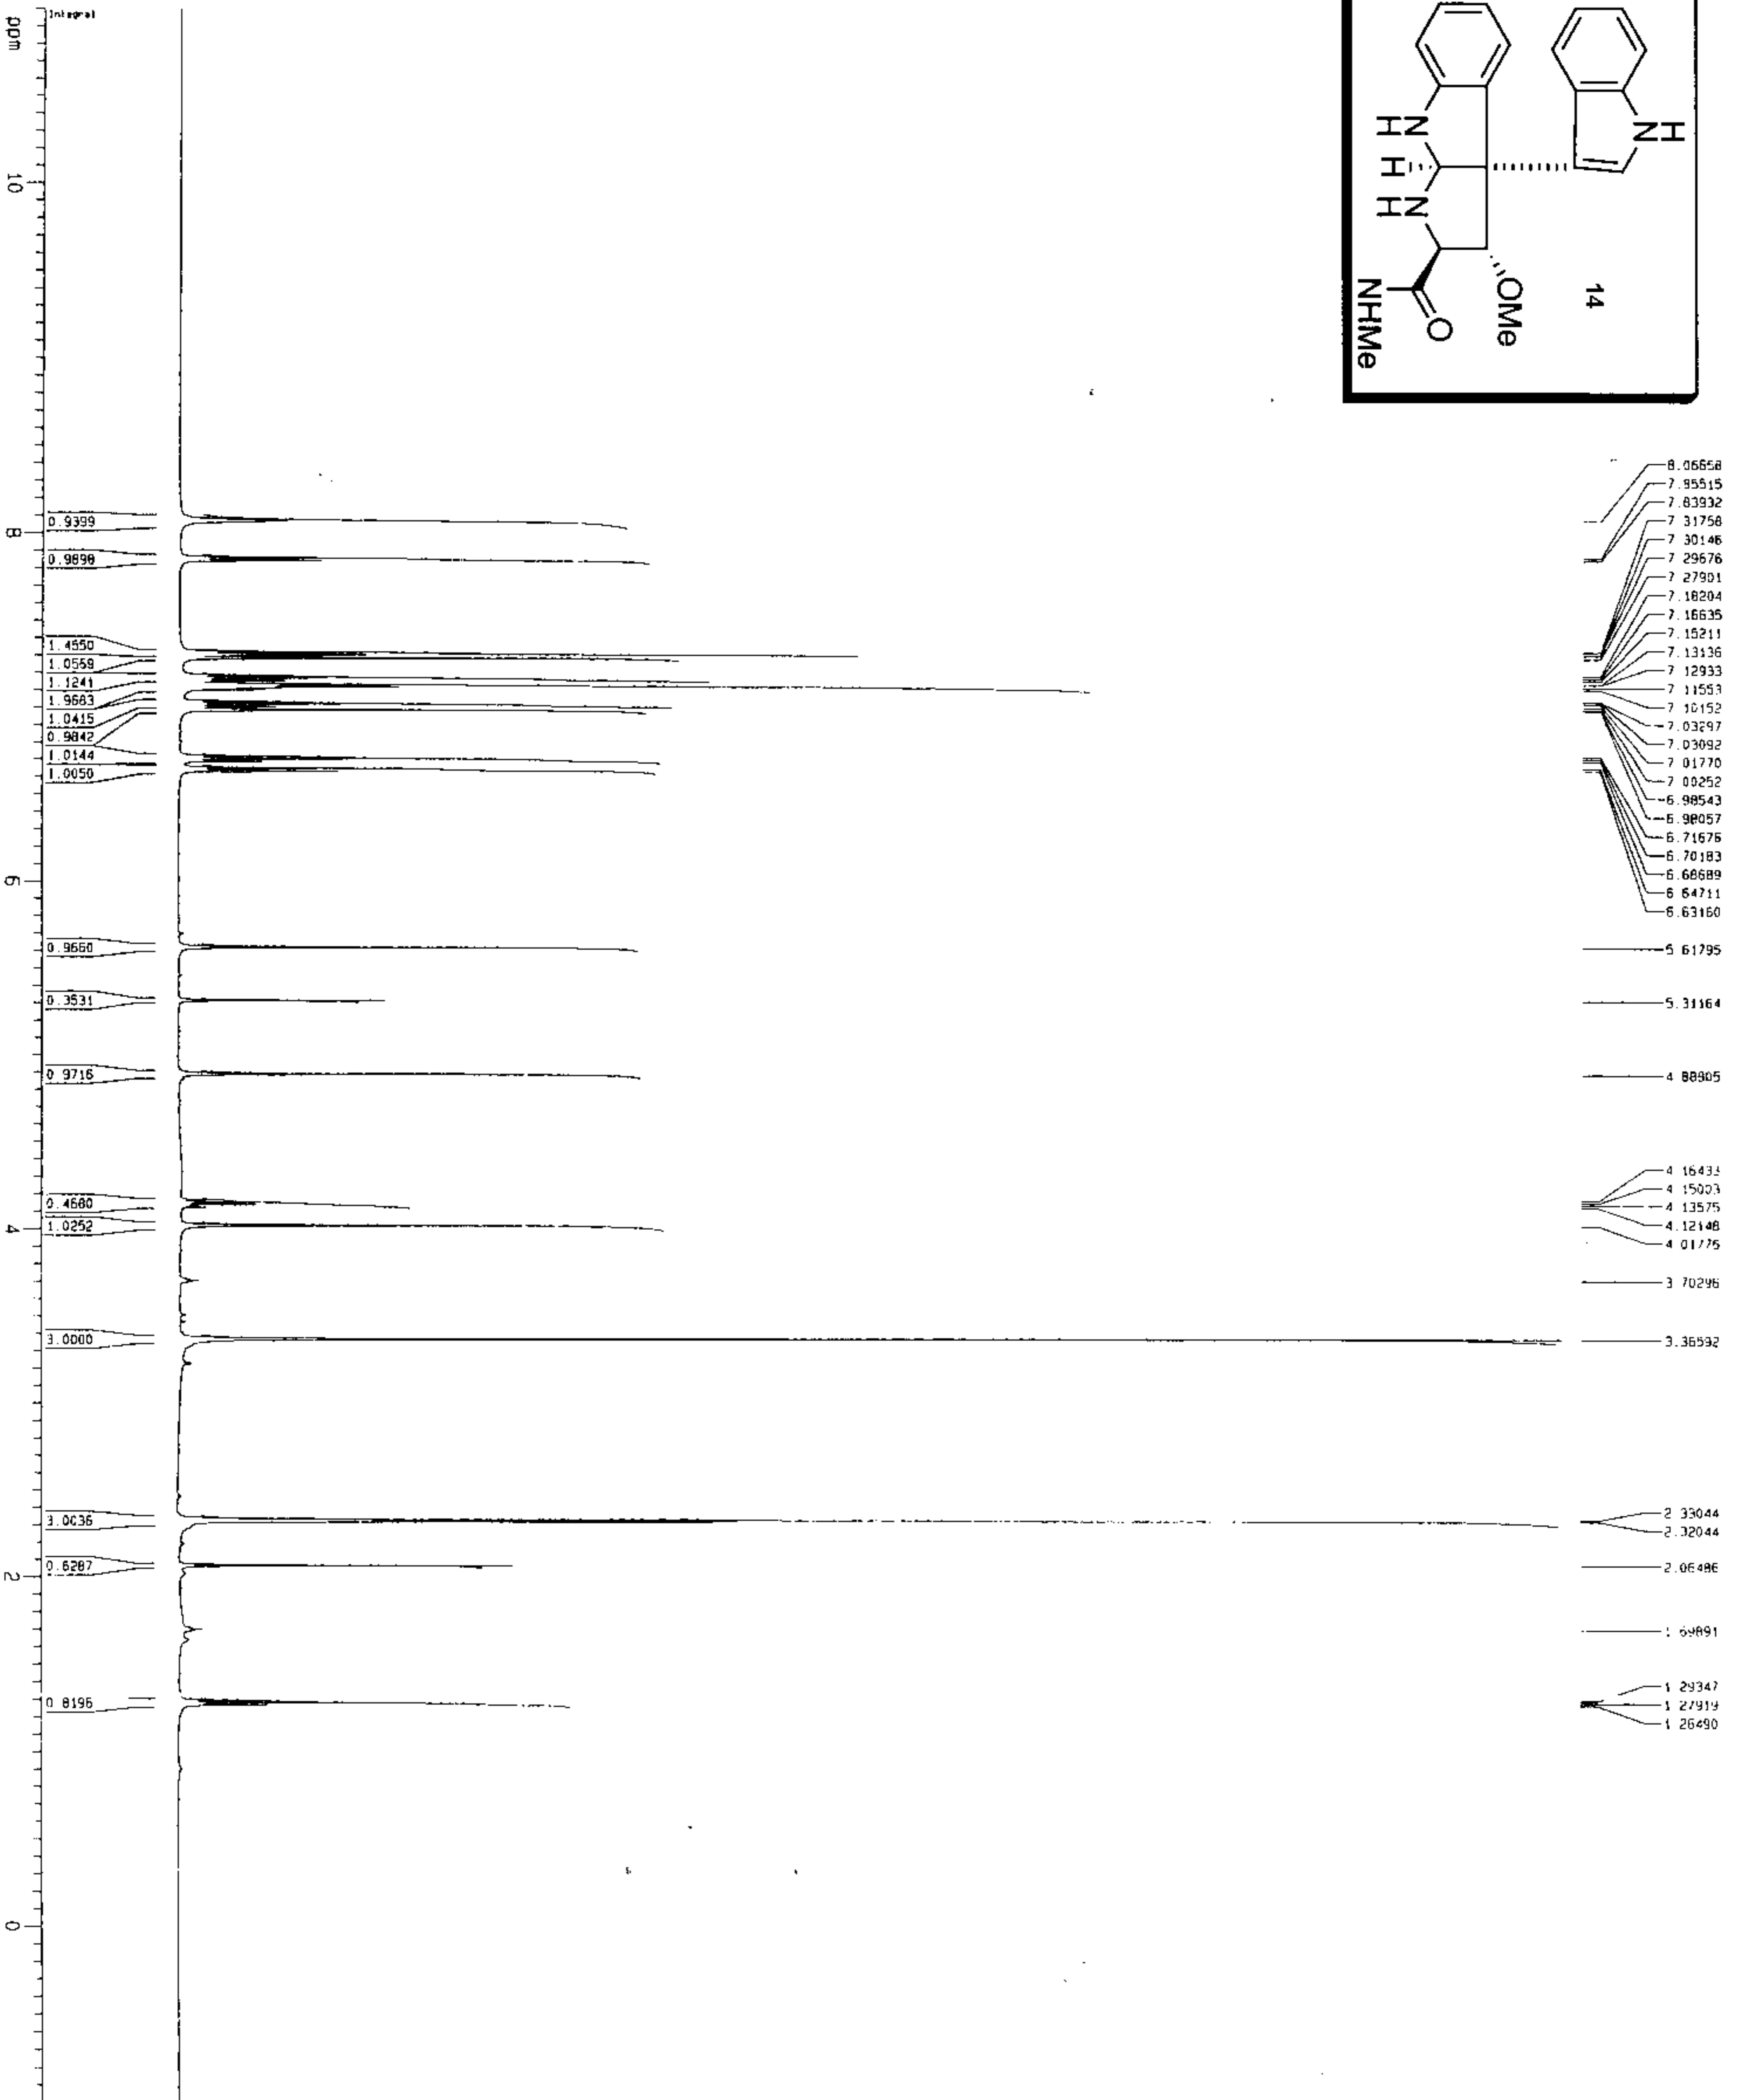

Current Data Parameters  
 USER yshin  
 NAME yshin0406  
 EXPNO 1  
 PROCNO 1

F2 - Acquisition Parameters  
 Date\_ 200604  
 Time 17:35  
 INSTRUM spect  
 PULPROG zgpg30  
 PROCNO 1  
 F4 2030  
 SFO 400.146  
 SOLVENT CDCl3  
 NS 2  
 DS 2  
 SWH 8012.460 Hz  
 FIDRES 0.09043 Hz  
 AQ 5.09043 sec  
 RG 256  
 DW 62.400 usec  
 DE 6.30 usec  
 TE 298.2 K  
 D1 0.10000000 sec  
 DCREST 0.00000000 sec  
 MCWK 0.01000000 sec

\*\*\*\*\* CHANNEL f1 \*\*\*\*\*  
 NUC1 1H  
 P1 11.50 usec  
 PL1 3.00 dB  
 SFO1 499.9334995 MHz

F2 - Processing parameters  
 SI 655.36  
 SF 499.9334995 MHz  
 MON FM  
 SSB 0  
 LB 0.30 Hz  
 GB 0  
 PC 4.00

ID NMR list parameters  
 CX 22.80 cm  
 CY 15.00 cm  
 FIP 11.500 cm  
 F1 5499.24 Hz  
 F2 1.000 DDM  
 F3 -499.93 Hz  
 PPMCM 0.52612 ppm/ppm  
 HZCM 353.12108 Hz/cm

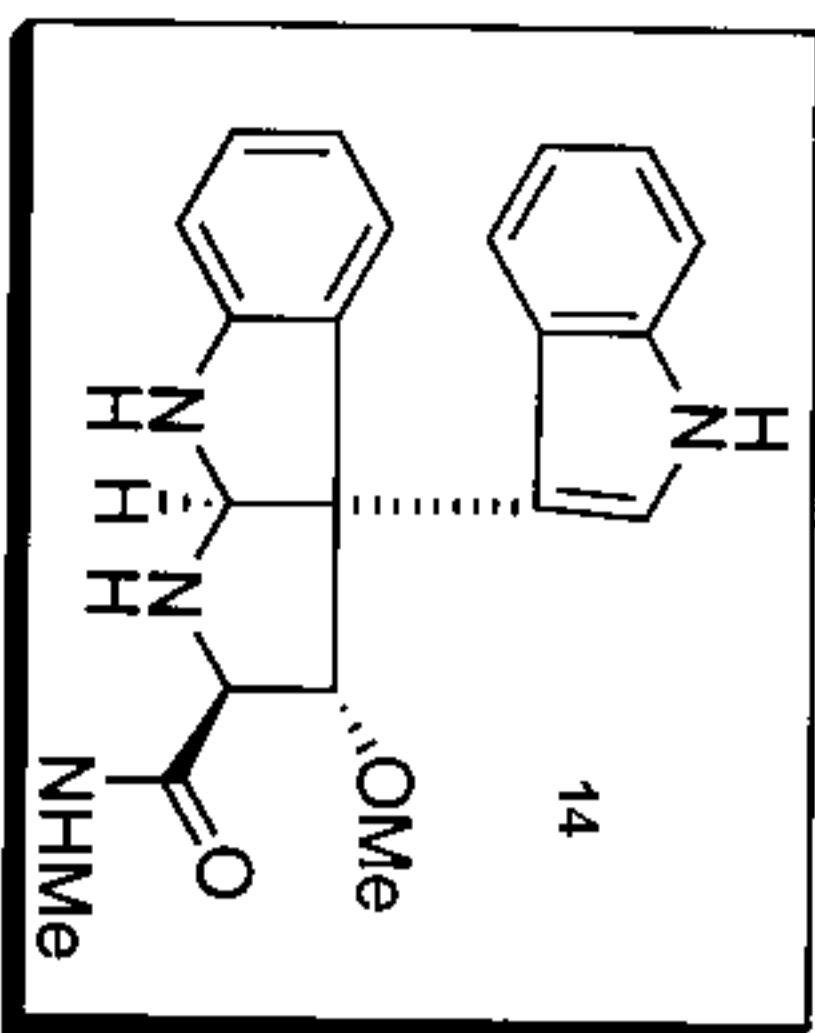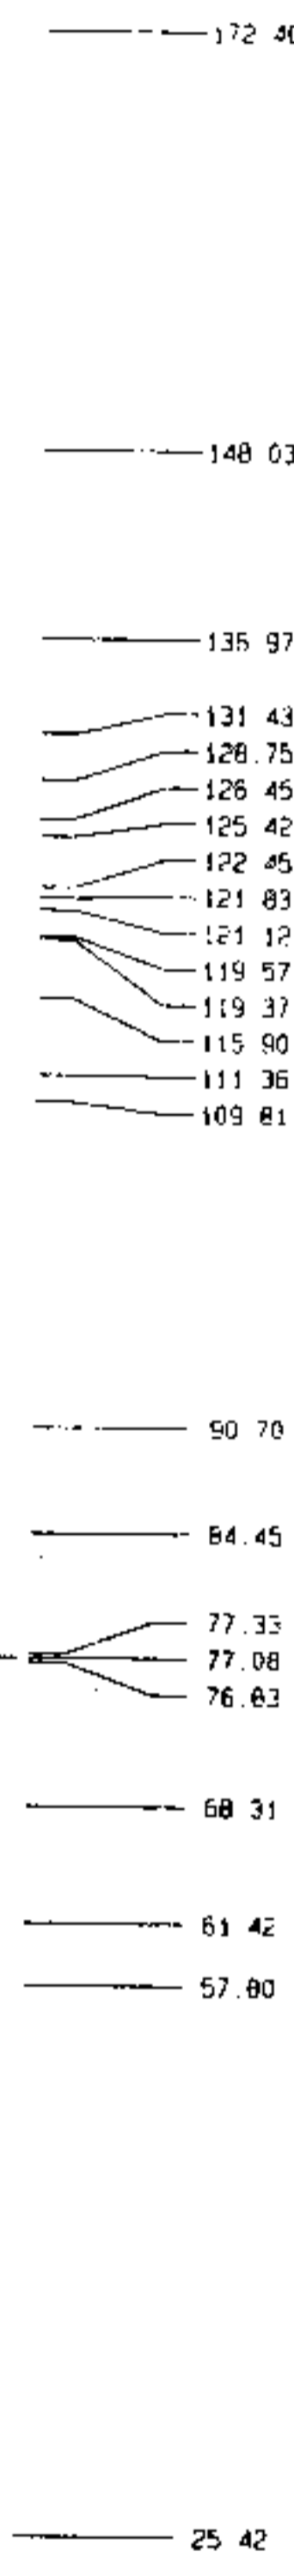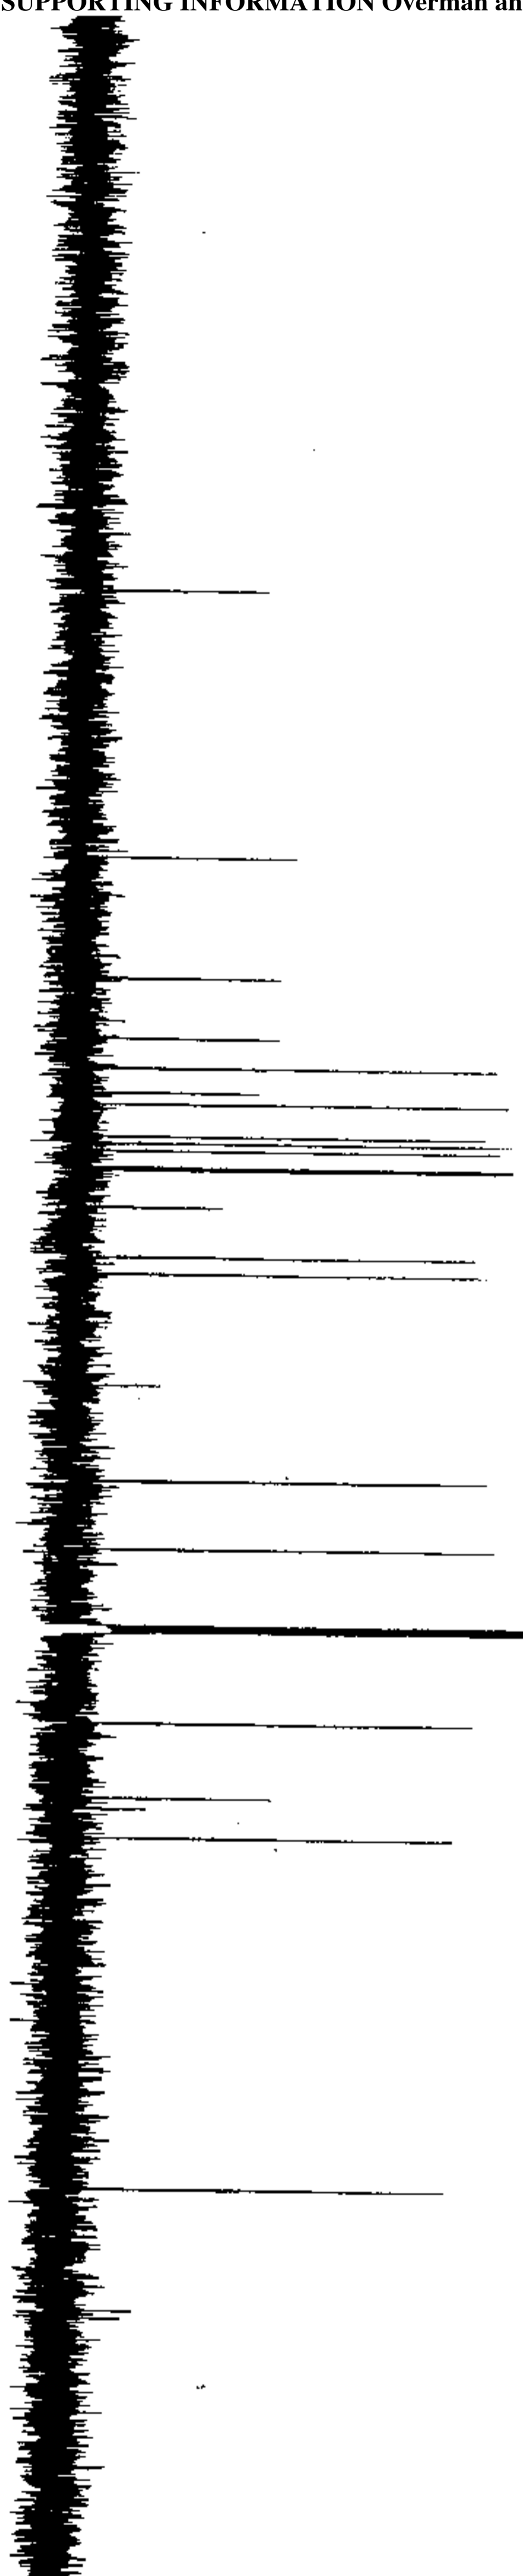

Current Data Parameters  
 USER ysshin  
 NAME yss080405  
 EXPNO 2  
 PROCNO 1

F2 - Acquisition Parameters  
 Date\_ 20060804  
 Time 17.40  
 INSTRUM gn500  
 PROBRD 5 mm broadband  
 PULPROG zgpg30  
 TD 65536  
 SOLVENT CDCl3  
 NS 207  
 DS 4

SWH 30303.031 Hz  
 FIDRES 0.462368 Hz  
 AQ 1.0214105 sec  
 RG 6502  
 DW 16.500 usec  
 DE 4.50 usec  
 TE 298.0 K  
 D1 0.25000000 sec  
 D11 0.03000000 sec  
 MURREST 0.00000000 sec  
 MCWRRK 0.01500000 sec

\*\*\*\*\* CHANNEL f1 \*\*\*\*\*  
 NUC1 13C  
 P1 7.00 usec  
 PL1 0.00 dB  
 SFO1 125.7213258 MHz

\*\*\*\*\* CHANNEL f2 \*\*\*\*\*  
 CPDPRG2 waltz16  
 NUC2 1H  
 P2 80.00 usec  
 PL2 -3.00 dB  
 PL12 15.00 dB  
 SFO2 499.9324997 MHz

F2 - Processing Parameters  
 SI 55536  
 SF 125.7074980 MHz  
 MDW EM  
 SSB 0  
 LB 1.00 Hz  
 GB 0  
 PC 2.00

10 MHz plot parameters.  
 CX 22.80 cm  
 CY 15.65 cm  
 F1P 225.000 ppm  
 F1 28284.19 Hz  
 F2P -15.000 ppm  
 F2 -1885.61 Hz  
 PRPCH 10.52632 ppm/cm  
 HZCM 1323.28682 Hz/cm



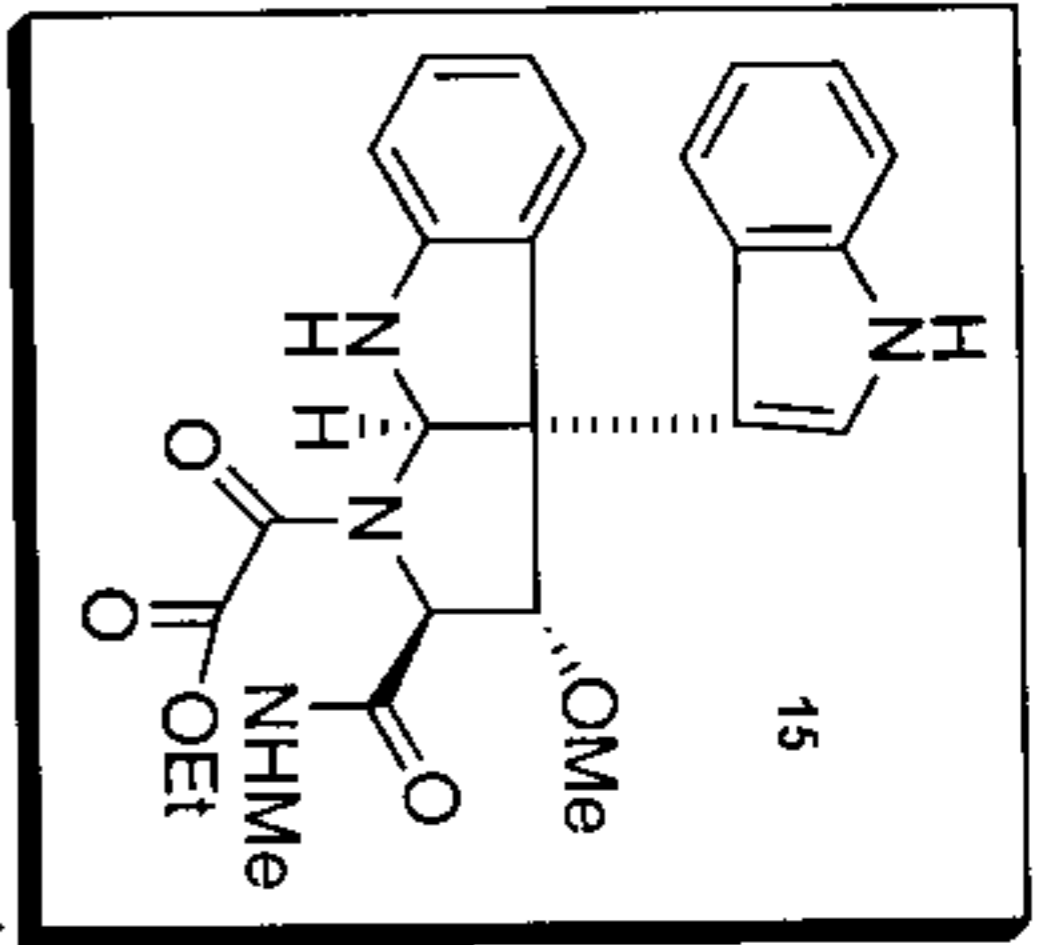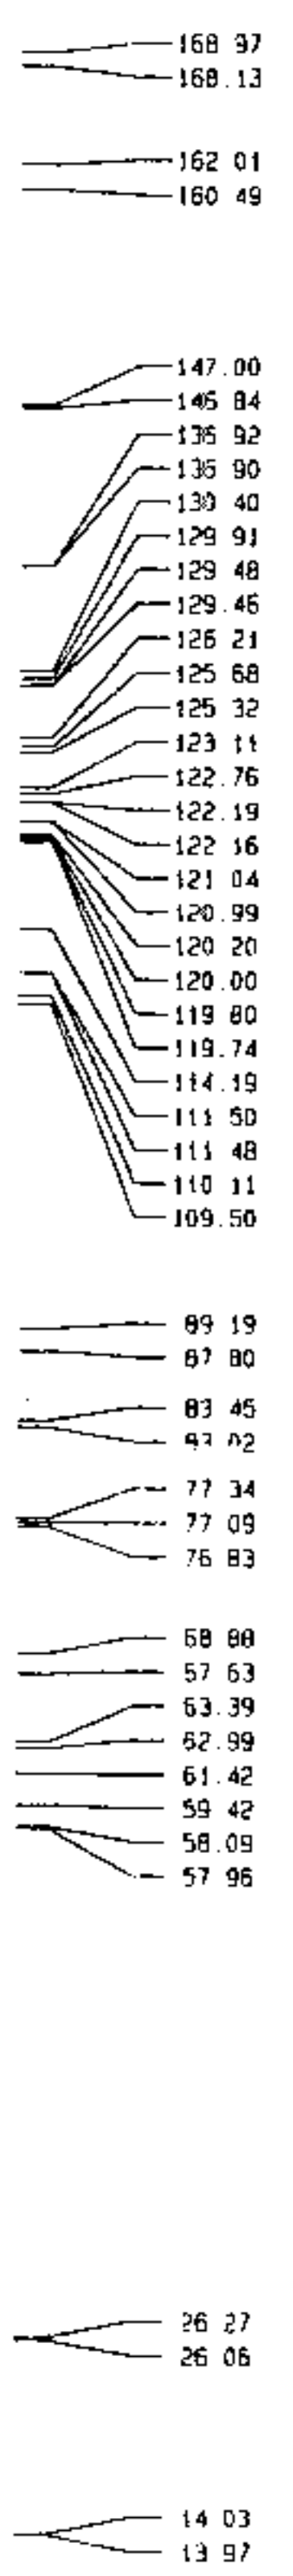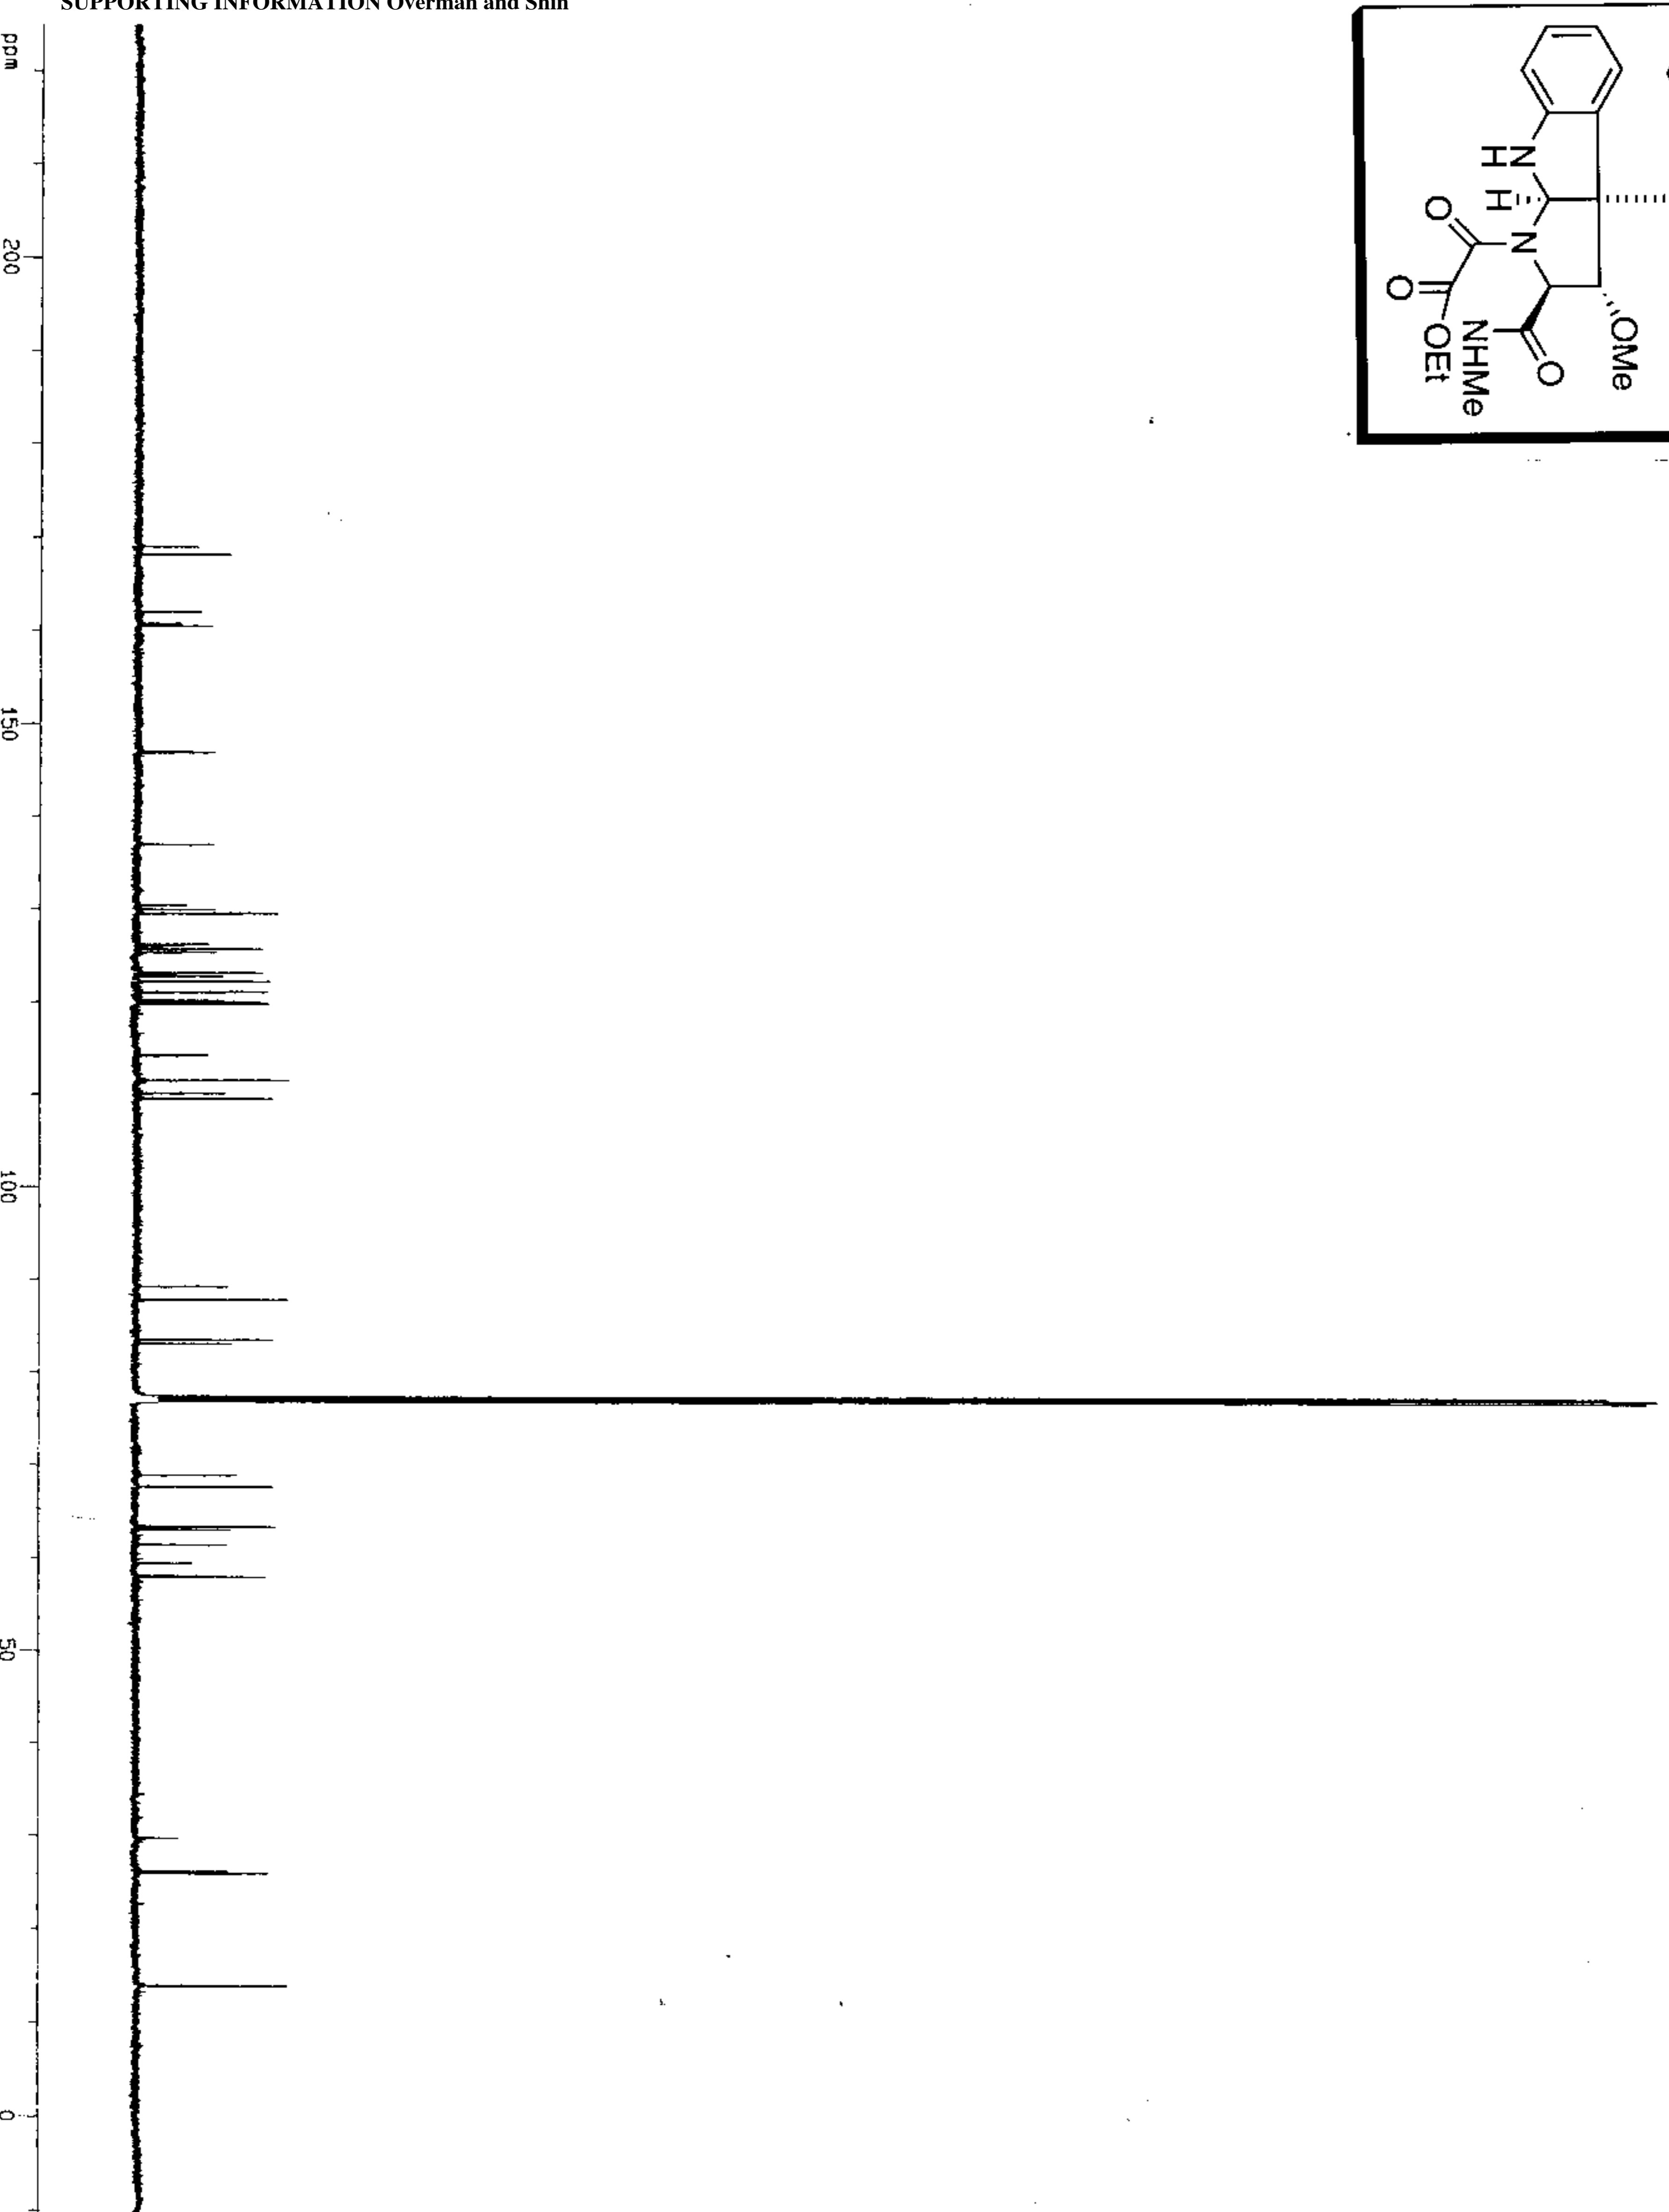

Current Data Parameters  
 USER vsshin  
 NAME yss082206  
 EXPNO 3  
 PROCNO 1

F2 - Acquisition Parameters  
 Date\_ 20060822  
 Time 16.53  
 INSTRUM cryo500  
 PROBRD 5 mm CP1H1H-  
 PULPROG zgpg30  
 TD 65418  
 SOLVENT CDCl3  
 NS 1170  
 DS 4  
 SWH 30303.031 Hz  
 FIDRES 0.463222 Hz  
 AQ 1.0794470 sec  
 RG 11585.2  
 DW 16.500 usec  
 DE 5.00 usec  
 TE 298.0 K  
 D1 0.25000000 sec  
 d11 0.03000000 sec  
 MCOREST 0.00000000 sec  
 MCKMR 0.01500000 sec

\*\*\*\*\* CHANNEL f1 \*\*\*\*\*  
 NUC1 13C  
 P1 15.00 usec  
 PL1 -1.00 dB  
 SFO1 125.7942548 MHz

\*\*\*\*\* CHANNEL f2 \*\*\*\*\*  
 CPDPRG2 waltz16  
 NUC2 1H  
 PCPD2 100.00 usec  
 PL2 1.60 dB  
 PL12 23.54 dB  
 SFO2 500.2225011 MHz

F2 - Processing parameters  
 SI 65536  
 SF 125.7604190 MHz  
 MDW Em  
 SSB 0  
 LB 1.00 MHz  
 GB 0  
 PC 2.00

1D NMR plot parameters  
 CX 22.80 cm  
 CY 15.65 cm  
 F3P 225.000 ppm  
 F1 28300.59 Hz  
 F2P -15.000 ppm  
 F2 -1886.71 Hz  
 PPMQCM 10.52632 ppm/cm  
 HZCM 1324.00439 Hz/cm

SUPPORTING INFORMATION Overman and Shin

ppm

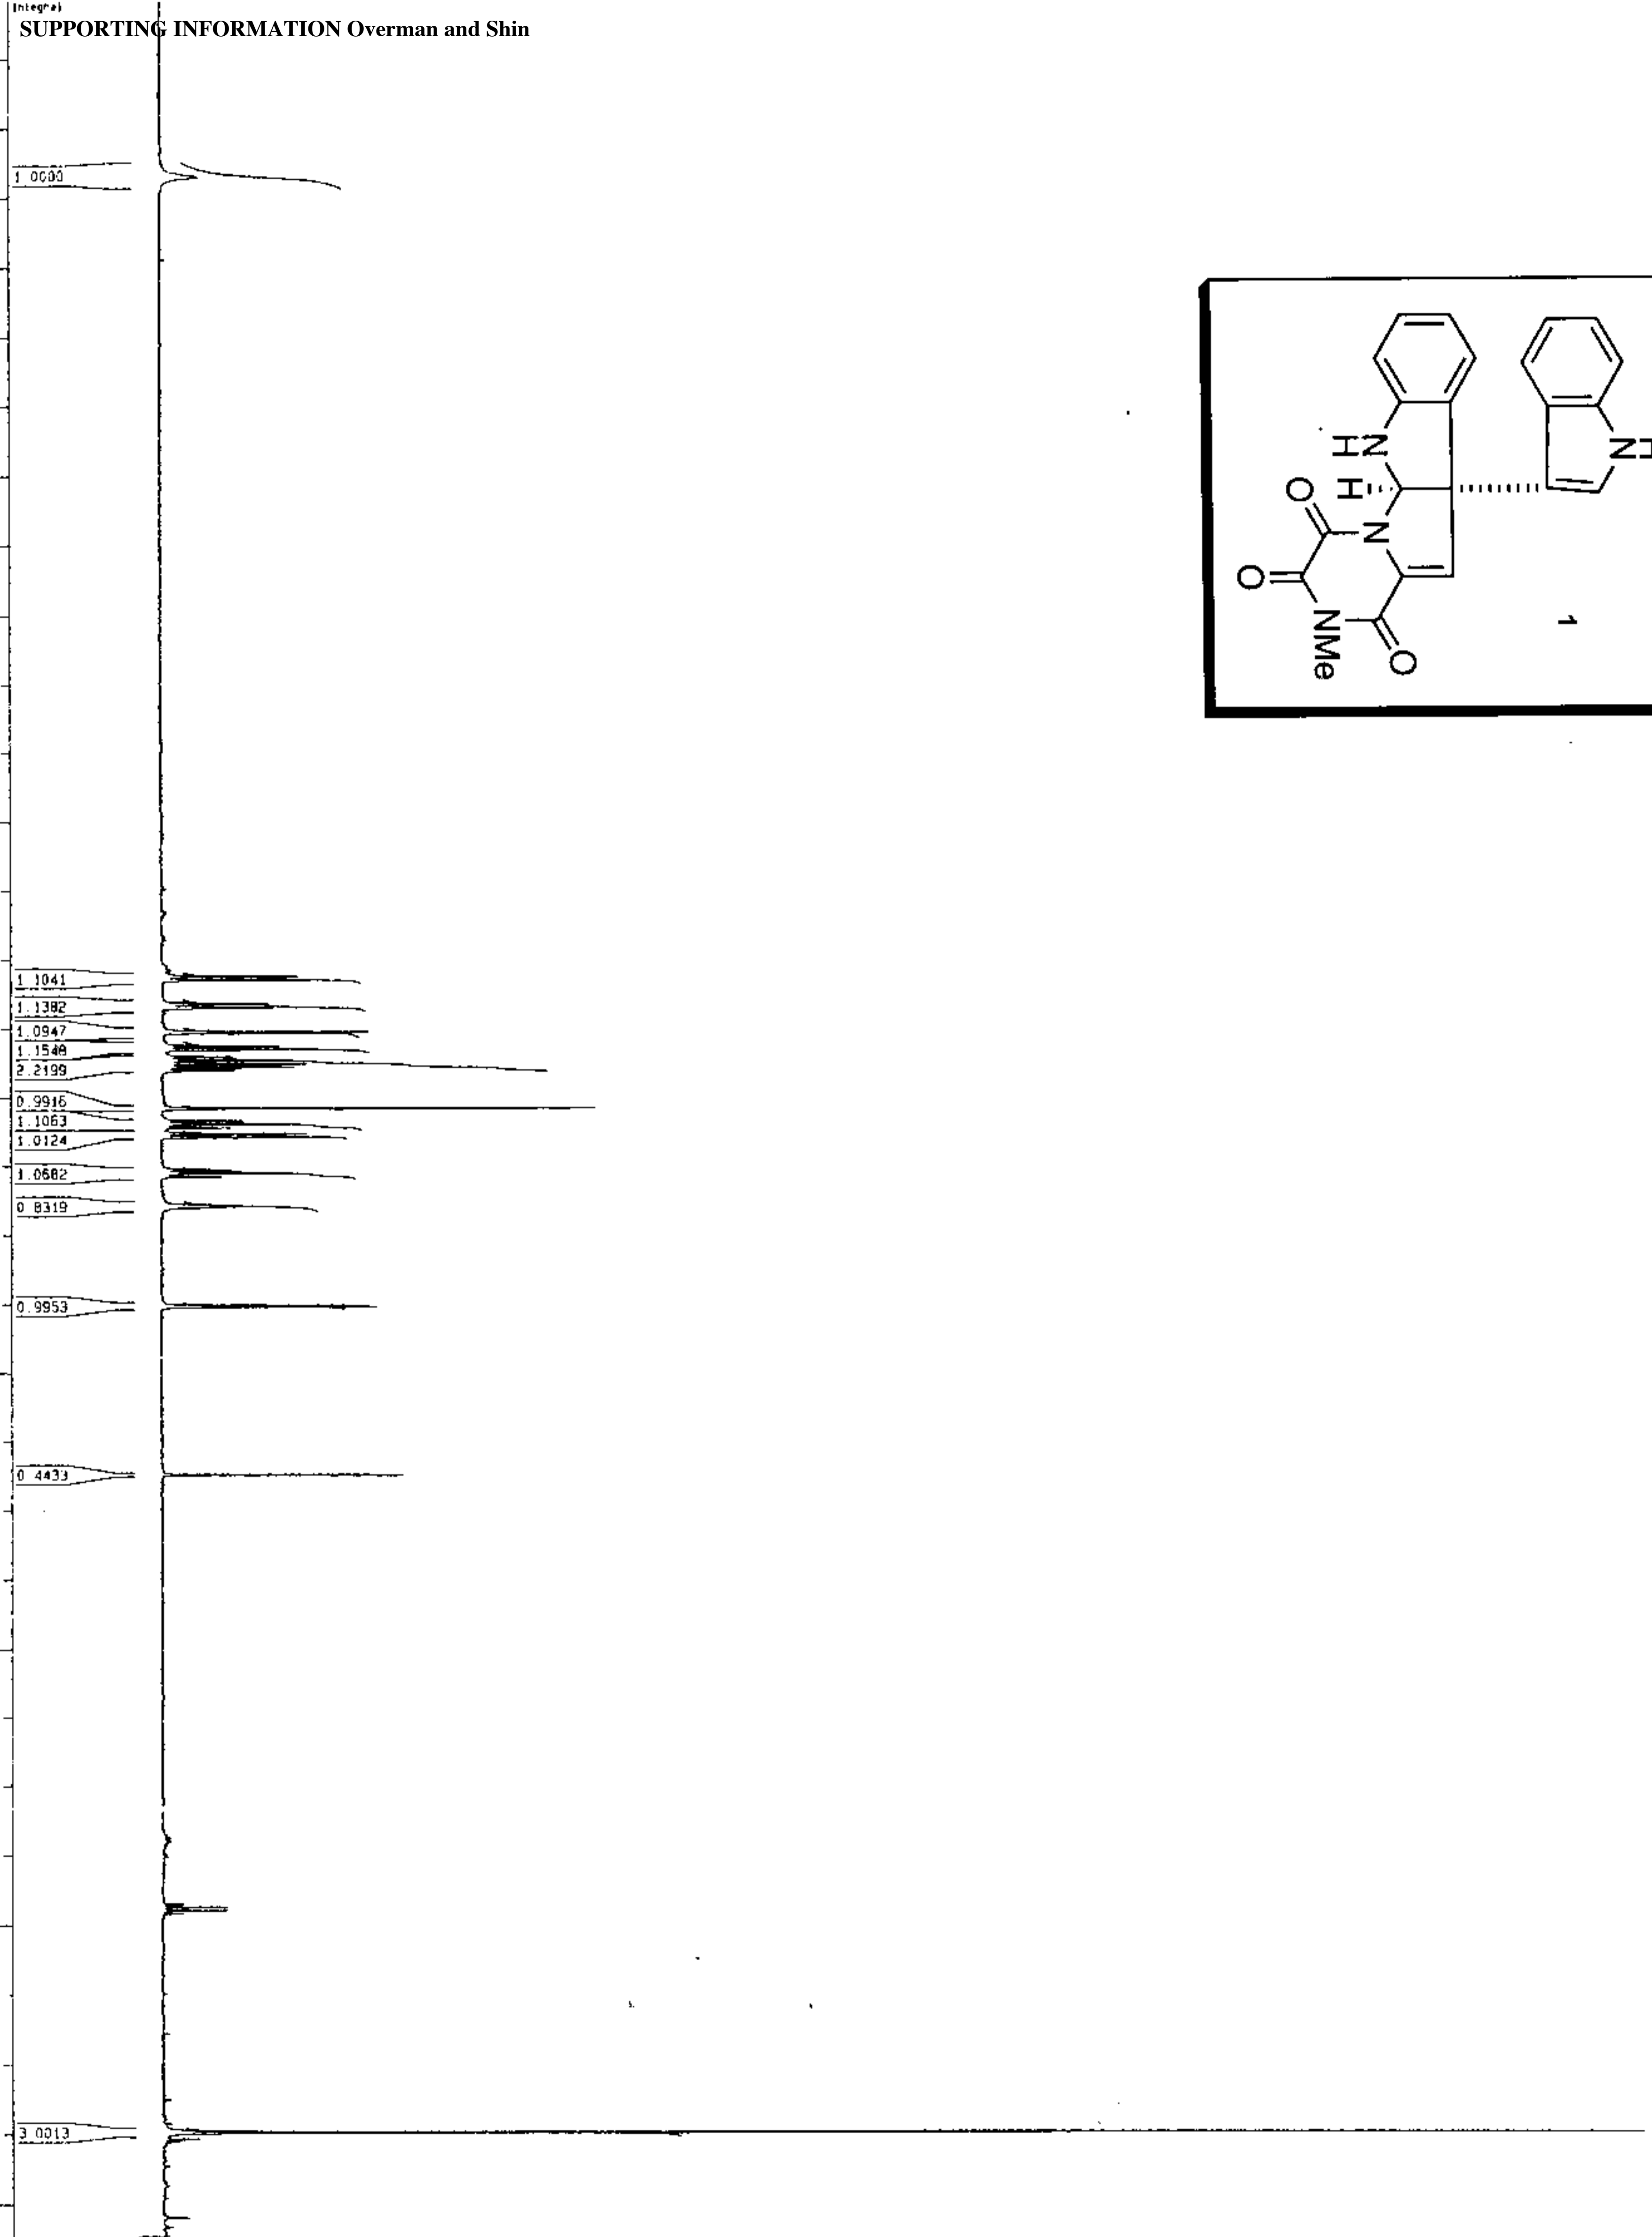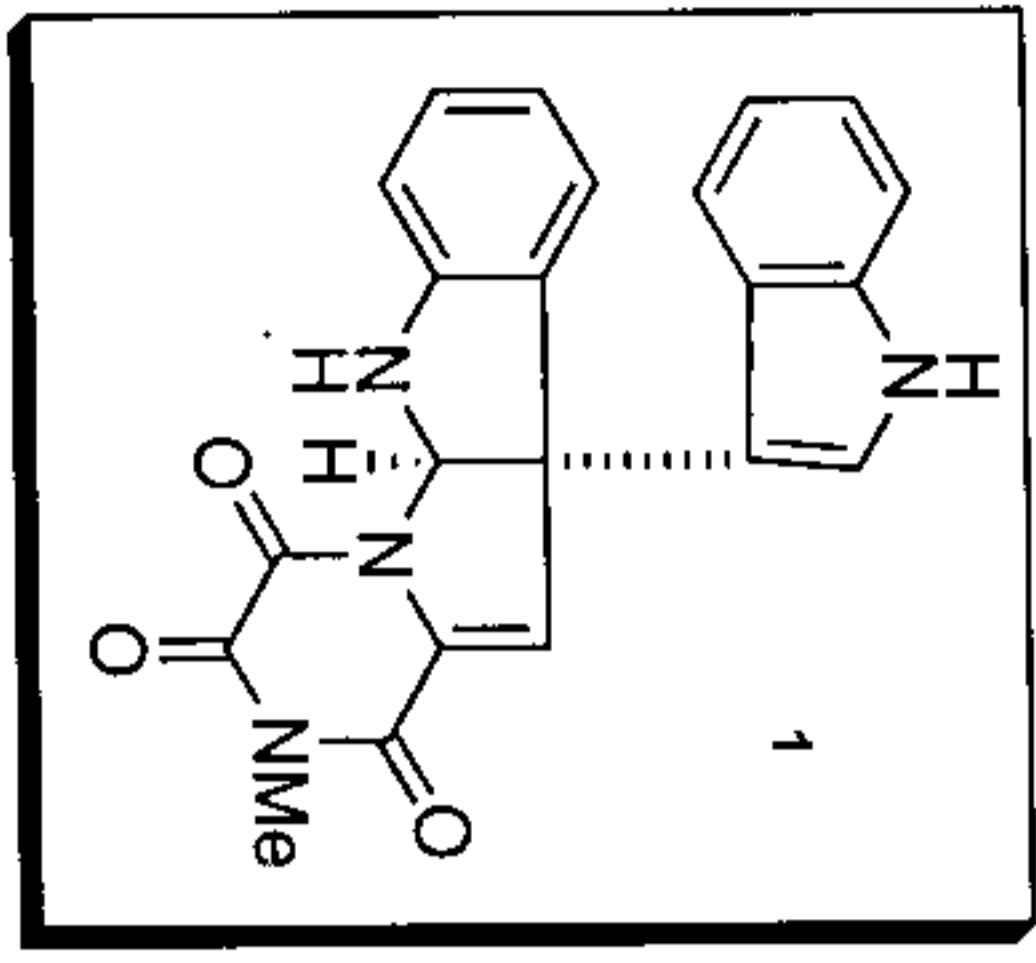

- 7.4391
- 7.4254
- 7.3404
- 7.3270
- 7.2388
- 7.2346
- 7.1860
- 7.1739
- 7.1483
- 7.1464
- 7.1355
- 7.1228
- 7.1210
- 7.1093
- 7.0973
- 7.0958
- 6.9599
- 6.9156
- 6.9145
- 6.9025
- 6.8904
- 6.8893
- 6.8683
- 6.8551
- 6.7364
- 6.7351
- 6.7241
- 6.7227
- 6.7118
- 6.7103
- 6.6056
- 6.2445
- 6.2403
- 5.6284

- 4.0784
- 4.0655
- 4.0546
- 4.0427

- 3.2570
- 3.2328

- 2.9524

Current Data Parameters  
 USER: g1an15  
 NAME: y55448  
 EXPNO: 2  
 PROCNO: 1

F2 - Acquisition Parameters  
 Date\_: 20060818  
 Time: 13.11  
 INSTRUM: avdd0  
 PROBHD: 5 mm TBI 1H/13  
 PULPROG: zg30  
 TD: 97938  
 SOLVENT: Acetone  
 NS: 8  
 DS: 2  
 SWH: 9615.385 Hz  
 FIDRES: 0.058178 Hz  
 AQ: 5.092829 sec  
 RG: 456  
 DW: 52.000 usec  
 DE: 6.00 usec  
 TE: 298.2 K  
 O1: 0.1000000 sec  
 T00: 1

----- CHANNEL f1 -----  
 NUC1: 1H  
 P1: 8.00 usec  
 PL1: -1.00 dB  
 SFO1: 600.1342009 MHz

F2 - Processing Parameters  
 SI: 65536  
 SF: 600.1300134 MHz  
 KW: EM  
 SSB: 0  
 LB: 0.30 Hz  
 GB: 0  
 PC: 1.00

1D NMR plot parameters  
 CX: 22.80 cm  
 CY: 15.00 cm  
 F1P: 10.965 ppm  
 F1: 6580.38 Hz  
 F2P: 2.856 ppm  
 F2: 1713.97 Hz  
 PPM/CM: 0.35565 ppm/cm  
 MZCM: 213.43810 Hz/cm

SUPPORTING INFORMATION Overman and Shin

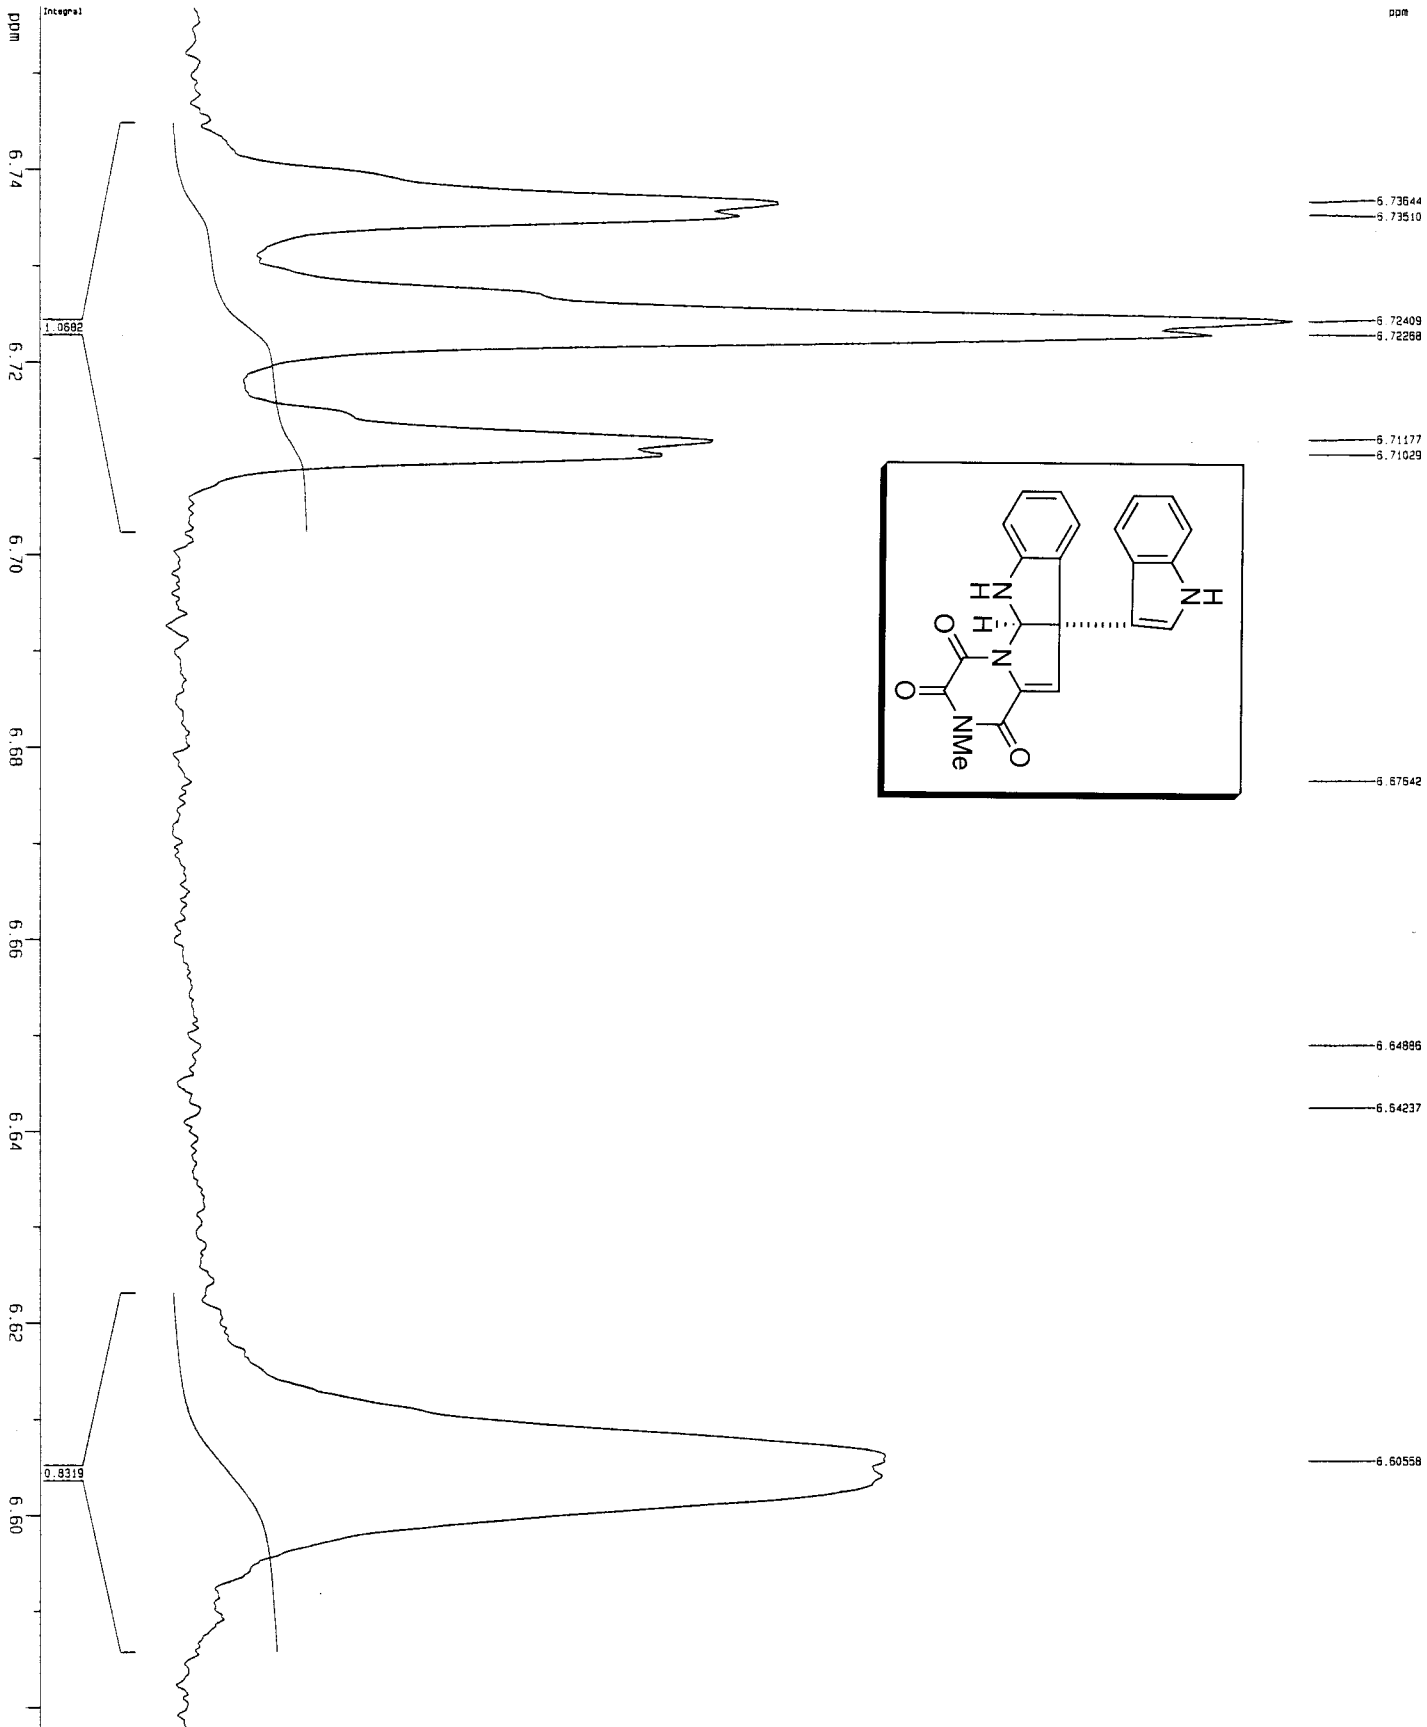

Current Data Parameters  
 USER: dlanis  
 NAME: yss44g  
 EXPTNO: 2  
 PROCNO: 1

F2 - Acquisition Parameters  
 Date\_: 20060818  
 Time: 13.11  
 INSTRUM: av600  
 PROBRD: 5 mm TBI HX/13  
 PULPROG: zg30  
 TD: 97938  
 SOLVENT: Acetone  
 NS: 2  
 DS: 2  
 SHU: 9815.363 Hz  
 FIDRES: 0.000078 Hz  
 AQ: 5.0928252 sec  
 RG: 492  
 DM: 52.000 usec  
 DE: 6.00 usec  
 TE: 298.0 K  
 D1: 0.10000000 sec  
 TDD: 1

\*\*\*\*\* CHANNEL f1 \*\*\*\*\*  
 NUC1: 1H  
 P1: 8.00 usec  
 PL1: -1.00 dB  
 SFO1: 500.1342009 MHz

F2 - Processing parameters  
 SI: 65535  
 SF: 500.1300134 MHz  
 WDM: EM  
 SSB: 0  
 GB: 0.30 Hz  
 RB: 0 Hz  
 PC: 1.00

1D NMR Plot parameters  
 CX: 22.80 cm  
 CY: 15.00 cm  
 F1P: 6.757 ppm  
 F1: 4055.04 Hz  
 F2P: 5.578 ppm  
 F2: 3947.38 Hz  
 FREQM: 0.00787 ppm/cm  
 HZCM: 4.72225 Hz/cm



SUPPORTING INFORMATION Overman and Shin

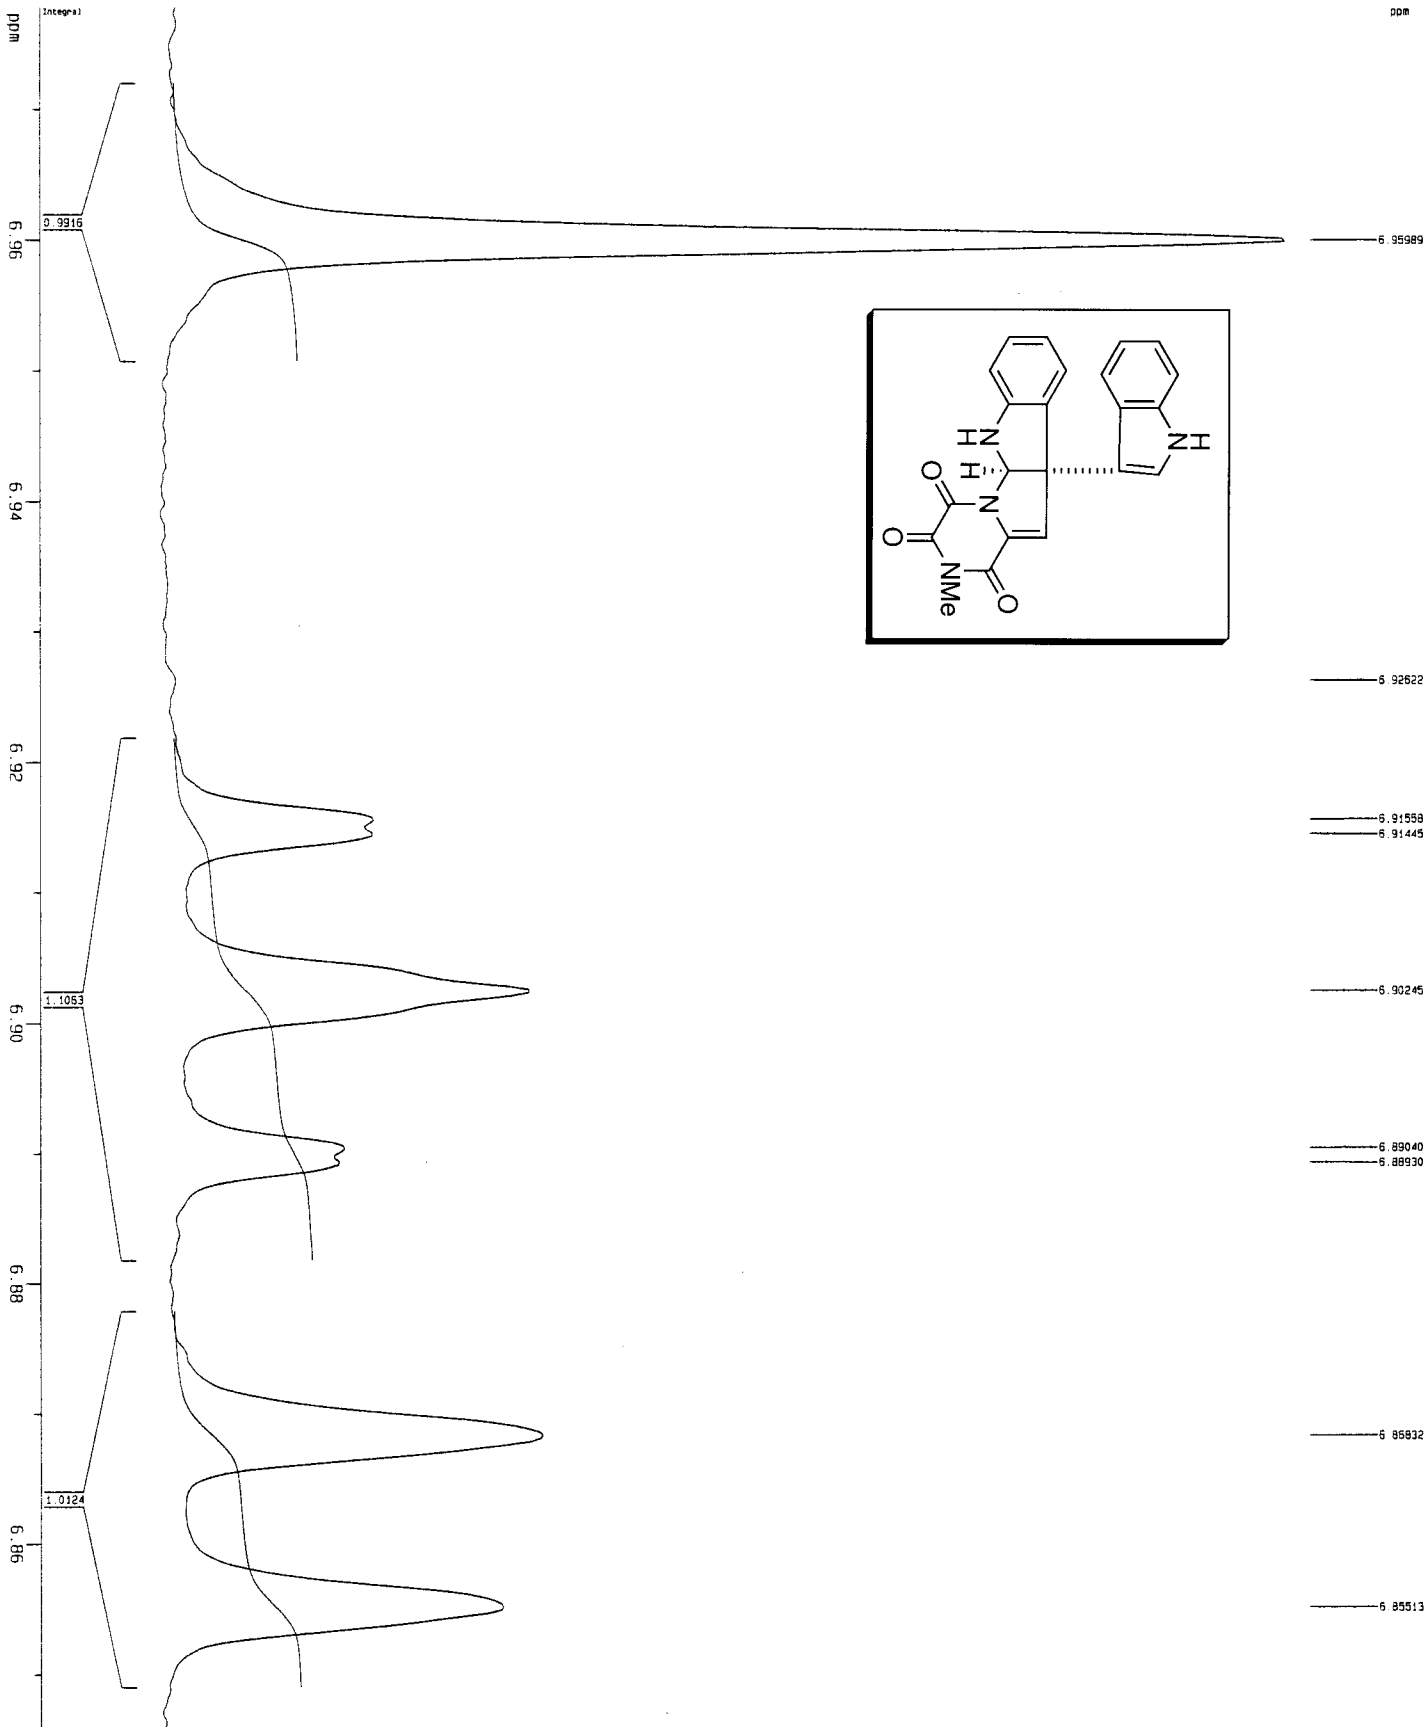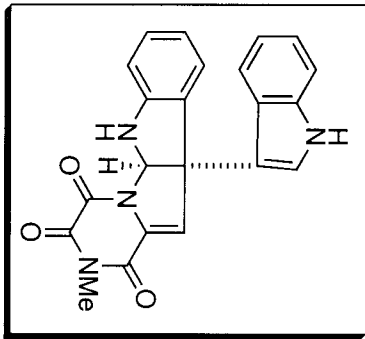

Current Data Parameters  
 USER dtanis  
 NAME y584f9  
 EXPNO 2  
 PROCNO 1

F2 - Acquisition Parameters  
 Date\_ 20060618  
 Time 13 11  
 INSTRUM av600  
 PROBRD 5 mm 1H/13  
 PULPROG zg30  
 ID 97938  
 SOLVENT Acetone  
 NS 9  
 DS 2  
 SWH 9615.365 Hz  
 FIDRES 0.0061728 Hz  
 AQ 5.0392929 sec  
 RG 495  
 DW 52.000 usec  
 DE 6.00 usec  
 TE 298.0 K  
 D1 0.10000000 sec  
 TBO 1

----- CHANNEL f1 -----  
 NUC1 1H  
 P1 8.00 usec  
 PL1 -1.00 dB  
 SFO1 500.136209 MHz

F2 - Processing parameters  
 SI 65073.44 Hz  
 SF 600.136073 MHz  
 EQ 0  
 SSB 0  
 LB 0.30 Hz  
 GB 0  
 PC 1.00

1D NMR plot parameters  
 CX 22.80 cm  
 CY 15.00 cm  
 FIP 6.978 ppm  
 F1 4187.64 Hz  
 F2P 6.846 ppm  
 F2 4108.28 Hz  
 PPMCN 0.00590 ppm/cm  
 HZCN 3.48077 Hz/cm

SUPPORTING INFORMATION Overman and Shin

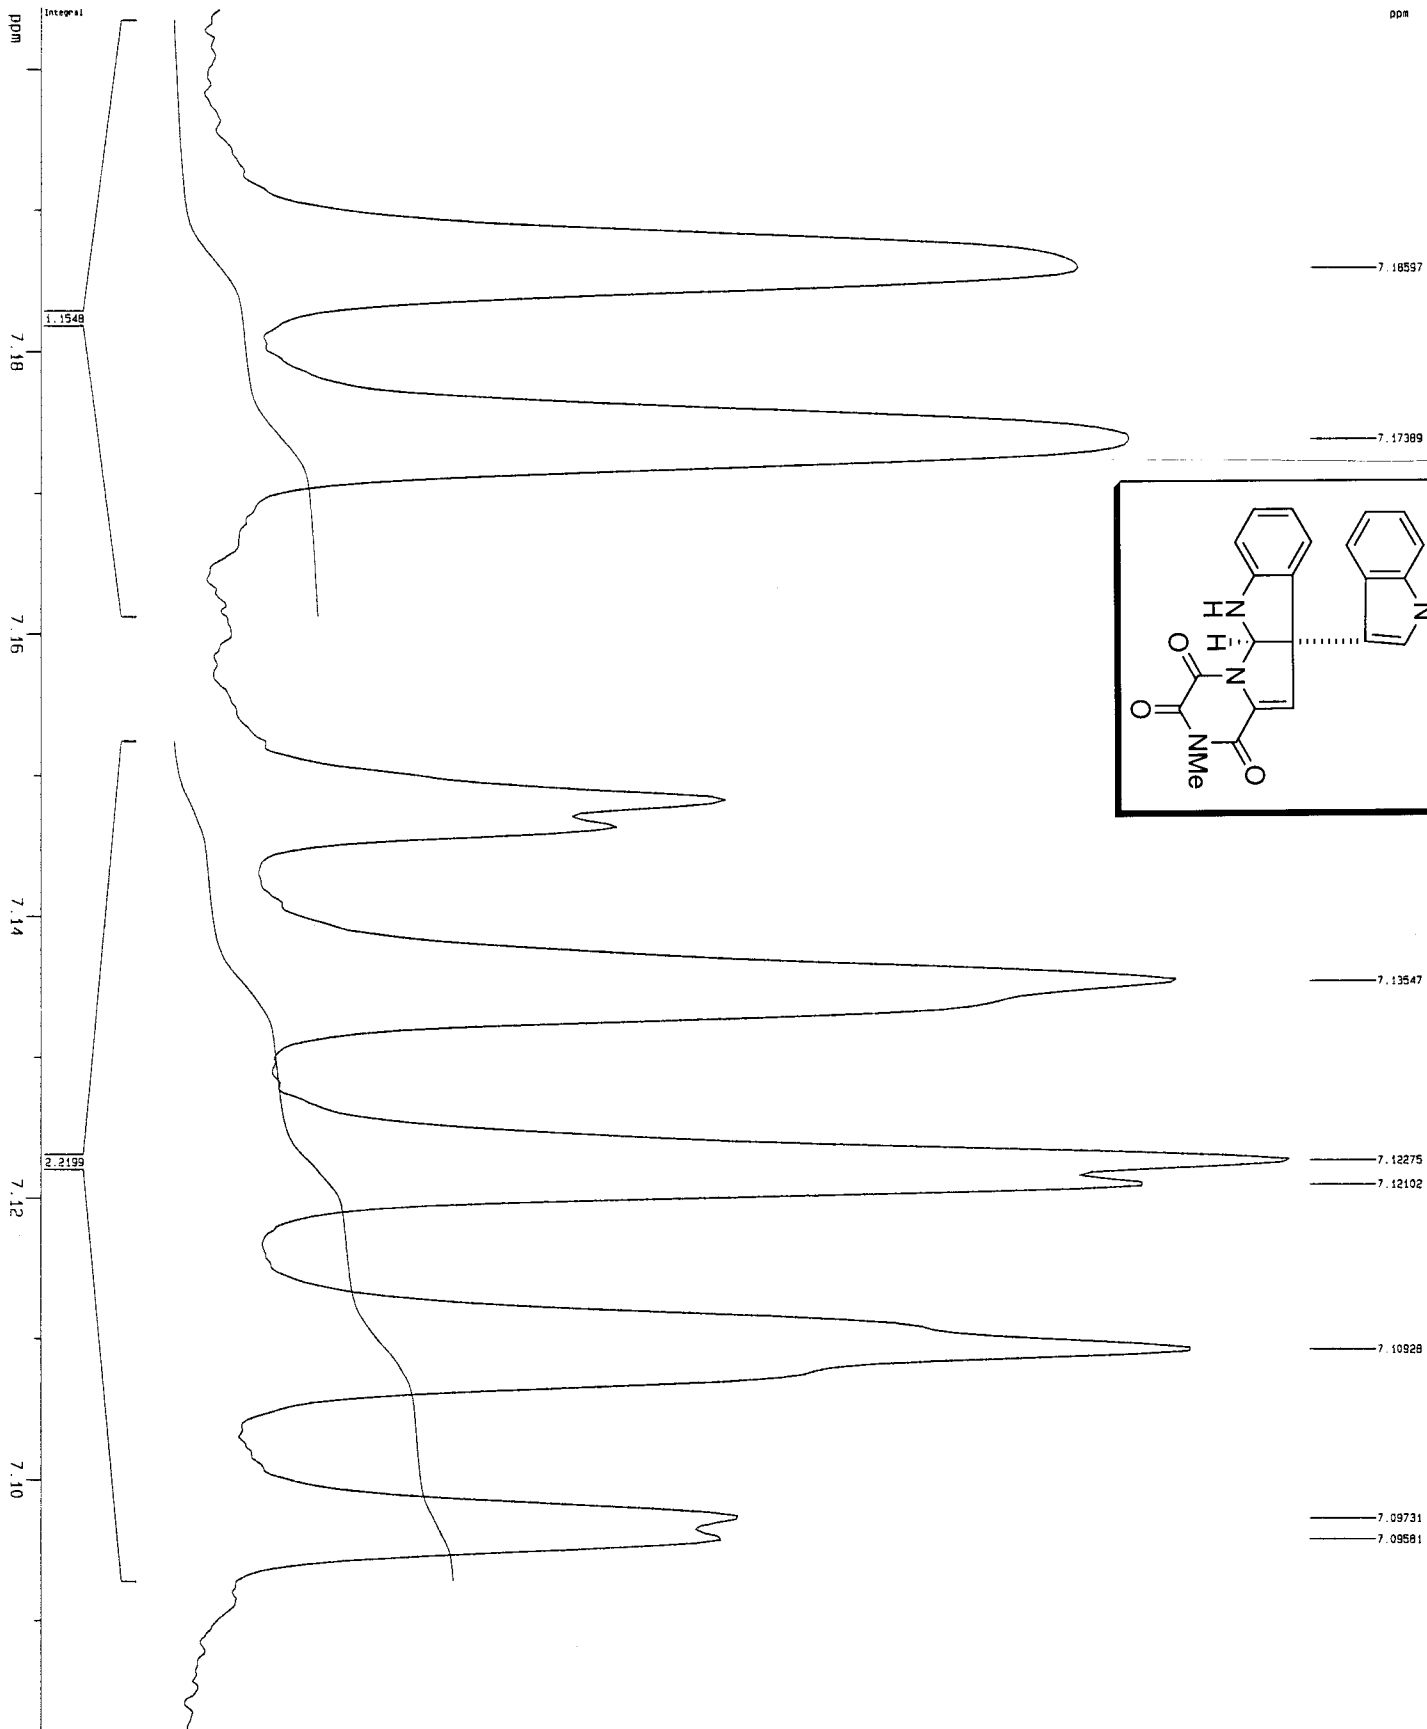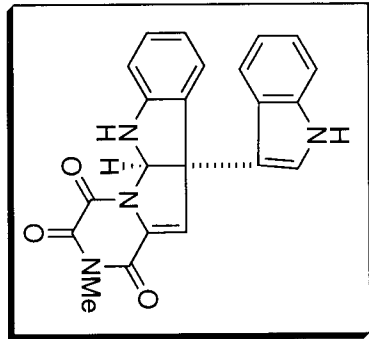

Current Data Parameters  
 USER d1ans  
 NAME y55449  
 EXPNO 2  
 PROCNO 1

F2 - Acquisition Parameters  
 Date\_ 20060918  
 Time 13.14  
 INSTRUM av600  
 PROBR4 5 mm 1H/13  
 PULPROG zg30  
 TD 97938  
 SOLVENT Acetone  
 NS 8  
 DS 2  
 SWH 9815.385 Hz  
 FIDRES 0.102672 Hz  
 AQ 5.0928259 sec  
 QB 456  
 DE 52.000 usec  
 OE 6.00 usec  
 TE 298.0 K  
 D1 0.10000000 sec  
 T00 1

\*\*\*\*\* CHANNEL f1 \*\*\*\*\*  
 NUC1 1H  
 P1 8.00 usec  
 PL1 -1.00 dB  
 SFO1 500.1342099 MHz

F2 - Processing parameters  
 SI 65535  
 SFMH 500.1300134 MHz  
 EQ  
 SSB 0  
 LB 0.30 Hz  
 GB 0  
 PC 1.00

30 NMR plot parameters  
 CX 22.80 cm  
 CY 15.00 cm  
 F1P 7.204 ppm  
 F1 4323.58 Hz  
 F2P 7.082 ppm  
 F2 4250.17 Hz  
 GPCOM 0.006537 ppm/cm  
 HZCOM 3.21994 Hz/cm

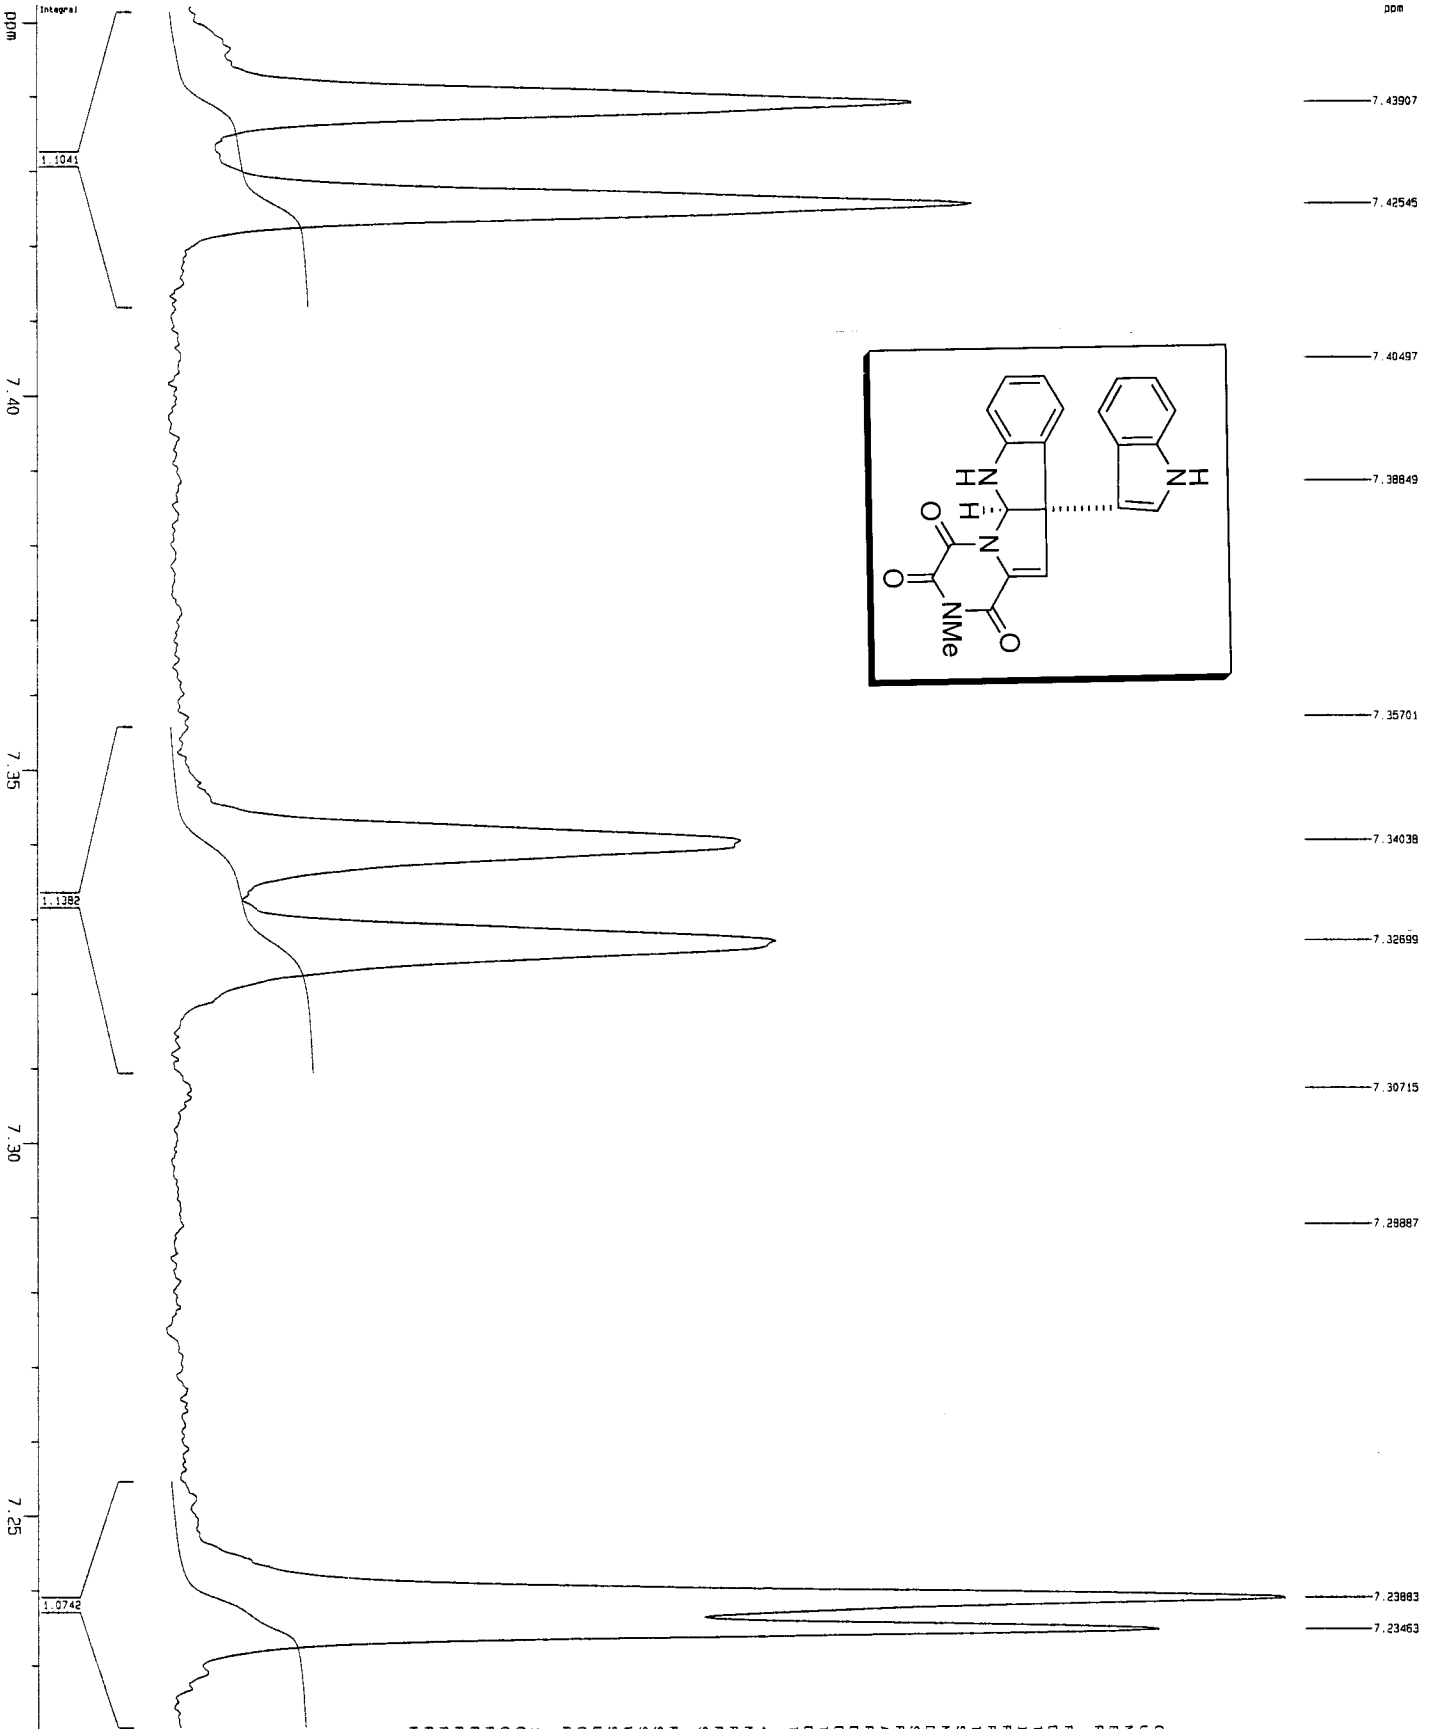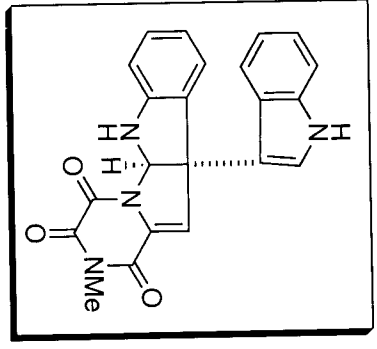

Current Data Parameters  
 USER p1anis  
 NAME yss449  
 EXMNO 2  
 PRXCMO 1

F2 - Acquisition Parameters  
 Date\_ 20050818  
 Time 13.13  
 INSTRM av630  
 PROBRD 5 mm 1H/13  
 PULPROG zg30  
 TO SOLVENT Acetone  
 NS 2  
 DS 2  
 SFO 9645.365 Hz  
 FIDRES 0.098179 Hz  
 AQ 5.028293 sec  
 RG 465  
 DM 52.000 usec  
 DE 6.00 usec  
 TE 298.0 K  
 D1 0.1000000 sec  
 TD 1

\*\*\*\*\* CHANNEL f1 \*\*\*\*\*  
 NUC1 1H  
 P1 8.00 usec  
 PL1 -1.00 dB  
 SFO1 500.1342019 MHz

F2 - Processing parameters  
 SI 658345  
 SF 500.1300134 MHz  
 MDW 0  
 SSB 0  
 LB 0.30 Hz  
 GB 0  
 PC 1.00

10 NMR list parameters  
 CX 22.80 cm  
 CY 15.00 cm  
 F1P 7.452 ppm  
 F1 4472.40 Hz  
 F2P 7.224 ppm  
 F2 4333.83 Hz  
 PPRCM 0.01013 ppm/cm  
 RZCM 6.0763 Hz/cm

YSS 449

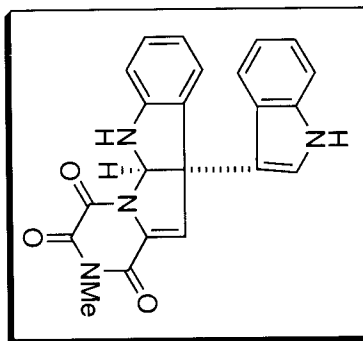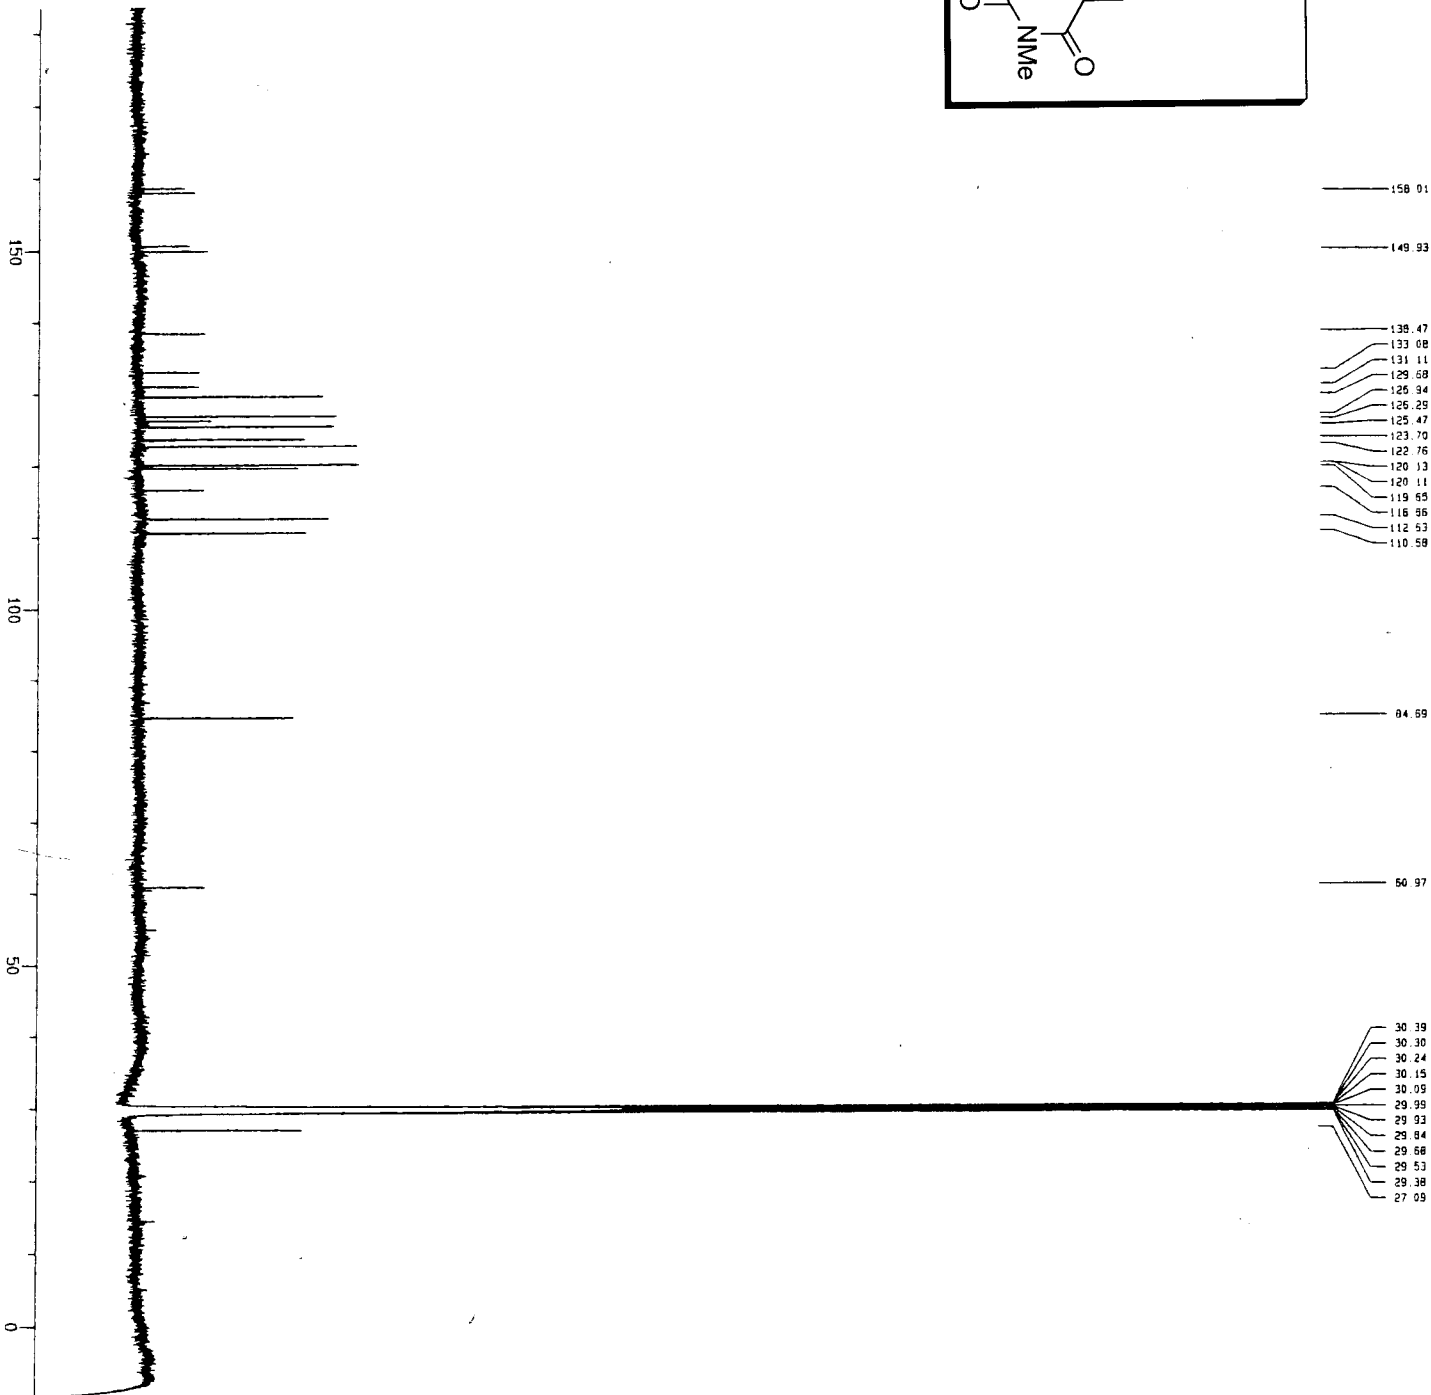

Current Data Parameters  
 USER yshin  
 NAME yss01506  
 EXPNO 3  
 PROCNO 1

F2 - Acquisition Parameters  
 Date\_ 20060815  
 Time 0.37  
 INSTRUM crys500  
 PROBNM 5 mm CP13 1H-  
 PULPROG zgpg30  
 TO 65418  
 SFOVENI C13  
 NS 20314  
 OS 4  
 SFO 300.3031 MHz  
 SF 300.3031 MHz  
 FIDRES 0.0000000 Hz  
 AQ 1.0000000 sec  
 RG 51460  
 DW 16.500 usec  
 DE 6.00 usec  
 TE 298.0 K  
 D1 0.2900000 sec  
 d11 0.0300000 sec  
 MCHEST 0.0000000 sec  
 HONEK 0.0150000 sec

\*\*\*\*\* CHANNEL f1 \*\*\*\*\*  
 NUC1 13C  
 P1 15.00 usec  
 PL -1.00 dB  
 SFO1 125.7942548 MHz

\*\*\*\*\* CHANNEL f2 \*\*\*\*\*  
 CPDPRG2 waltz16  
 NUC2 1H  
 P2 100.00 usec  
 PL2 1.60 dB  
 PL12 23.54 dB  
 SFO2 500.222011 MHz

F2 - Processing Parameters  
 SI 85326  
 SF 125.7942548 MHz  
 N 24  
 SFO 500.222011 MHz  
 LB 1.00 Hz  
 GB 0  
 PC 2.00

10 NMR plot parameters  
 CX 22.80 cm  
 CY 70.00 cm  
 FJP 225.000 DPM  
 F1 28300.57 Hz  
 F2 -1886.70 Hz  
 PPMCK 10.58632 DPM/CM  
 HZCM 1324.00330 HZ/CM

- 158.01
- 149.93
- 138.47
- 133.08
- 131.11
- 129.68
- 126.94
- 125.47
- 123.70
- 122.76
- 120.13
- 120.11
- 119.65
- 116.86
- 112.53
- 110.58
- 84.69
- 50.97
- 30.39
- 30.30
- 30.24
- 30.15
- 30.09
- 29.99
- 29.93
- 29.84
- 29.68
- 29.53
- 29.38
- 27.09

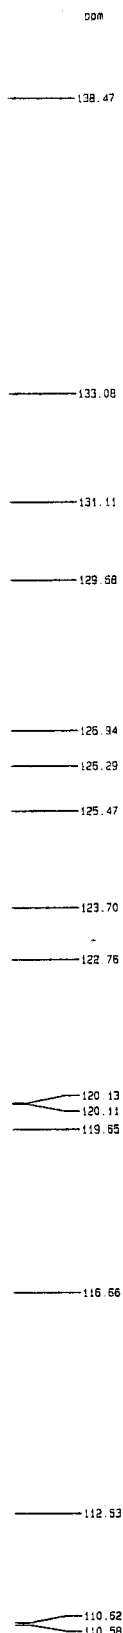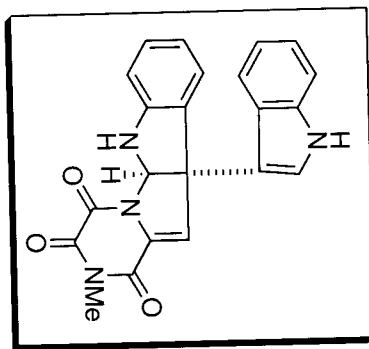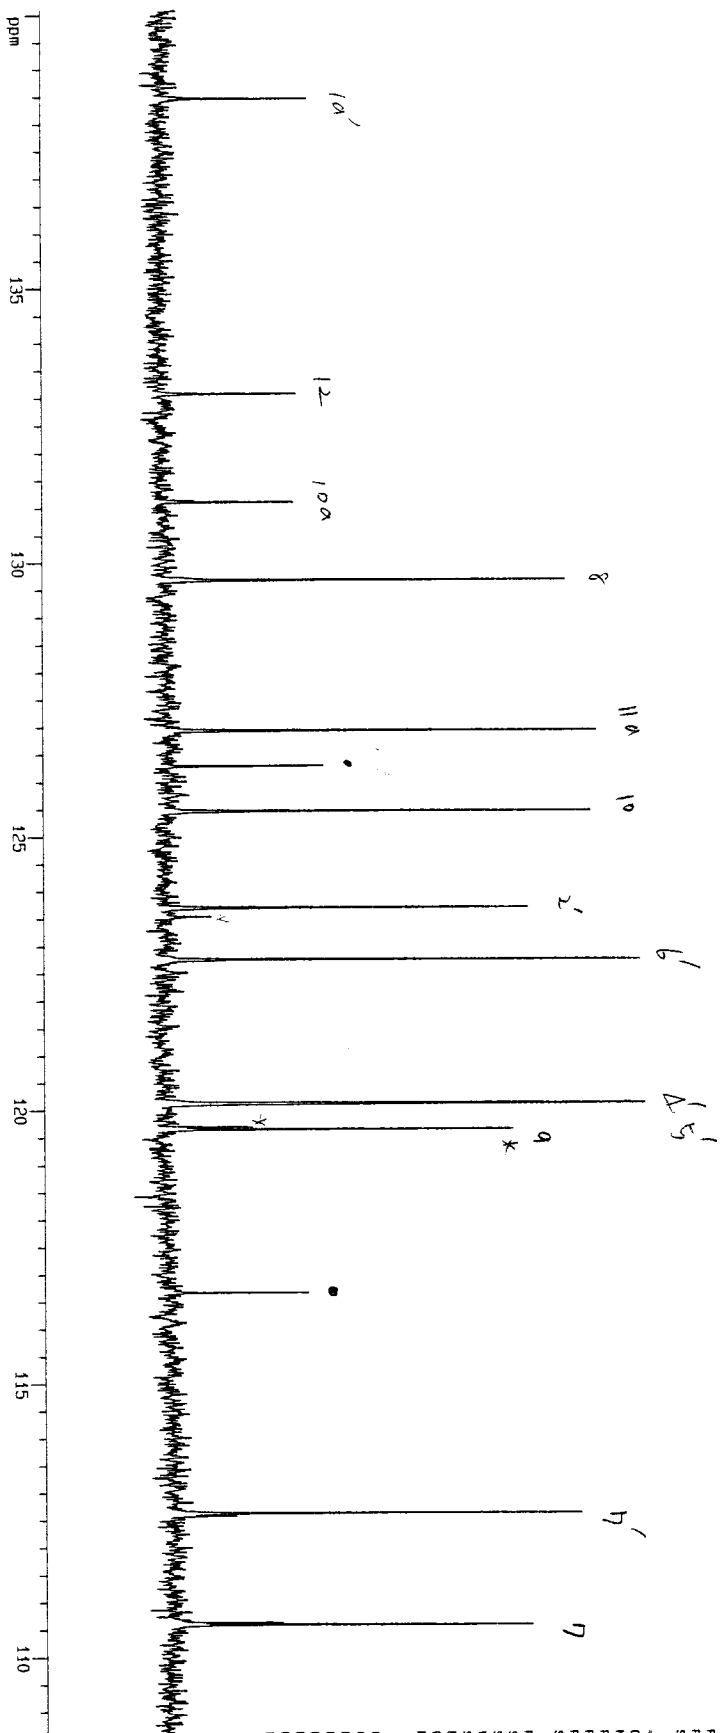

Current Data Parameters  
 USER ystarin  
 INSTRM cryos00  
 EXPNO 2  
 PROCNO 1

F2 - Acquisition Parameters  
 Date\_ 20060815  
 Time 0.37  
 INSTRM cryos00  
 PROBRD 5 mm CPIC1 H-  
 PULPROG zgpg30  
 TD 65418  
 SFO100 100.625 MHz  
 NS 20314  
 DS 4  
 SFO1 30303.031 Hz  
 FIDRES 0.463222 Hz  
 AQ 1.0794470 sec  
 RG 5160.0  
 DW 16.500 usec  
 DE 2.00 usec  
 TE 298.2 K  
 D1 0.2500000 sec  
 d11 0.0500000 sec  
 ACQRES 0.0600000 sec  
 MDWID 0.01500000 sec

\*\*\*\*\* CHANNEL f1 \*\*\*\*\*  
 NUC1 <sup>13</sup>C  
 P1 15.00 usec  
 PL1 -1.00 dB  
 SFO1 125.7942548 MHz

\*\*\*\*\* CHANNEL f2 \*\*\*\*\*  
 CHRGNC waltz16  
 NUC2 <sup>1</sup>H  
 P2 100.00 usec  
 PL2 1.60 dB  
 PL12 23.54 dB  
 SFO2 500.2250011 MHz

F2 - Processing parameters  
 SI 65636  
 SF 125.7603105 MHz  
 WHW 0  
 SSB 0  
 LB 1.00 Hz  
 GB 0  
 PC 1.00

10 NMR Pilot parameters  
 CX 22.80 cm  
 CY 7.00 cm  
 FIP 140.100 ppm  
 F1 17621.80 Hz  
 F2 168.593 ppm  
 F2P 13858.92 Hz  
 PUNCH 1.38186 ppm/cm  
 WDOM 173.81053 Hz/cm

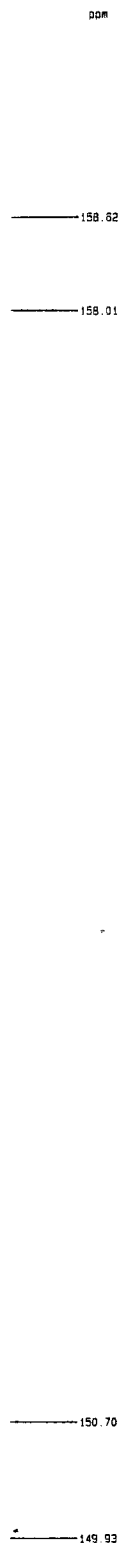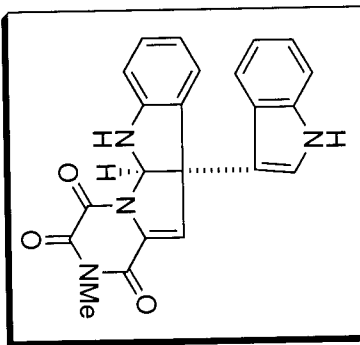

SUPPORTING INFORMATION Overman and Shin

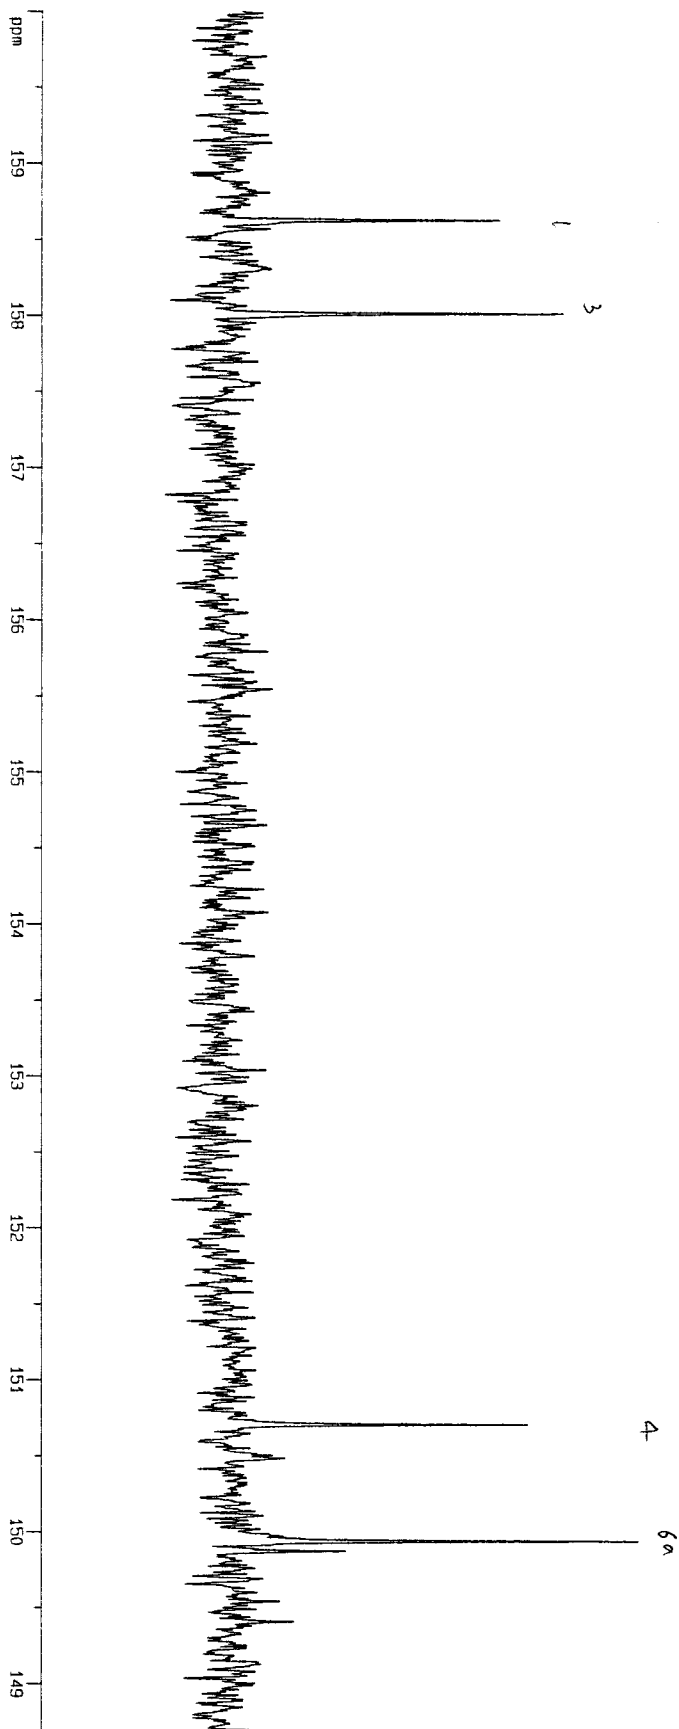

Current Data Parameters  
 USER: jshin  
 NAME: YS01506  
 EXPNO: 3  
 PROCNO: 1

F2 - Acquisition Parameters  
 Date\_: 20060915  
 Time: 0.37  
 INSTRUM: cryo500  
 PROBRD: 5 mm QNP1H  
 PULPROG: zgpg30  
 TD: 65416  
 SOLVENT: CDCl3  
 NS: 20314  
 DS: 4  
 SMH: 30303.031 Hz  
 FIDRES: 0.46322 Hz  
 AQ: 1.0794470 sec  
 RG: 5160.6  
 DW: 16.300 usec  
 DE: 2.00 usec  
 TE: 300.2 K  
 D1: 0.2500000 sec  
 d11: 0.0300000 sec  
 ICOREST: 0.0000000 sec  
 ICORCK: 0.0150000 sec

\*\*\*\*\* CHANNEL f1 \*\*\*\*\*  
 NUC1: <sup>13</sup>C  
 P1: 15.00 usec  
 PL1: -1.00 dB  
 SFO1: 125.7642548 MHz

\*\*\*\*\* CHANNEL f2 \*\*\*\*\*  
 CHRGPR2: null1716  
 NUCL2: <sup>1</sup>H  
 P2PRG2: 100.00 usec  
 PL2: 1.60 dB  
 PL12: 23.34 dB  
 SFO2: 500.225011 MHz

F2 - Processing parameters  
 SI: 65536  
 SF: 125.7603105 MHz  
 KW: EK  
 NS9: 0  
 LB: 1.00 Hz  
 GB: 0  
 PC: 1.00

10 NMR plot parameters  
 CX: 22.80 cm  
 CY: 7.00 cm  
 FIP: 160.005 ppm  
 F1: 20125.46 Hz  
 F2: 148.664 ppm  
 PPGXX: 0.48729 ppm/cm  
 WICK: 62.50133 Hz/cm

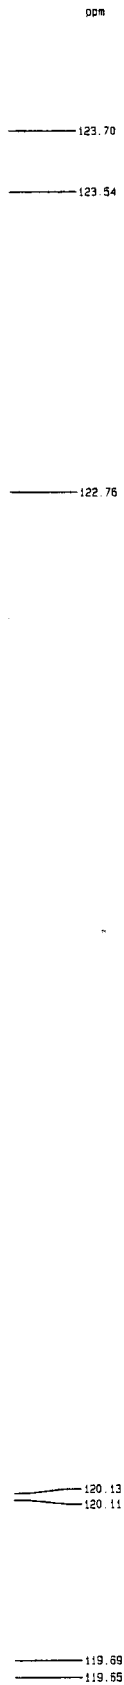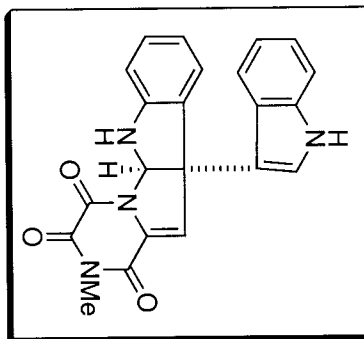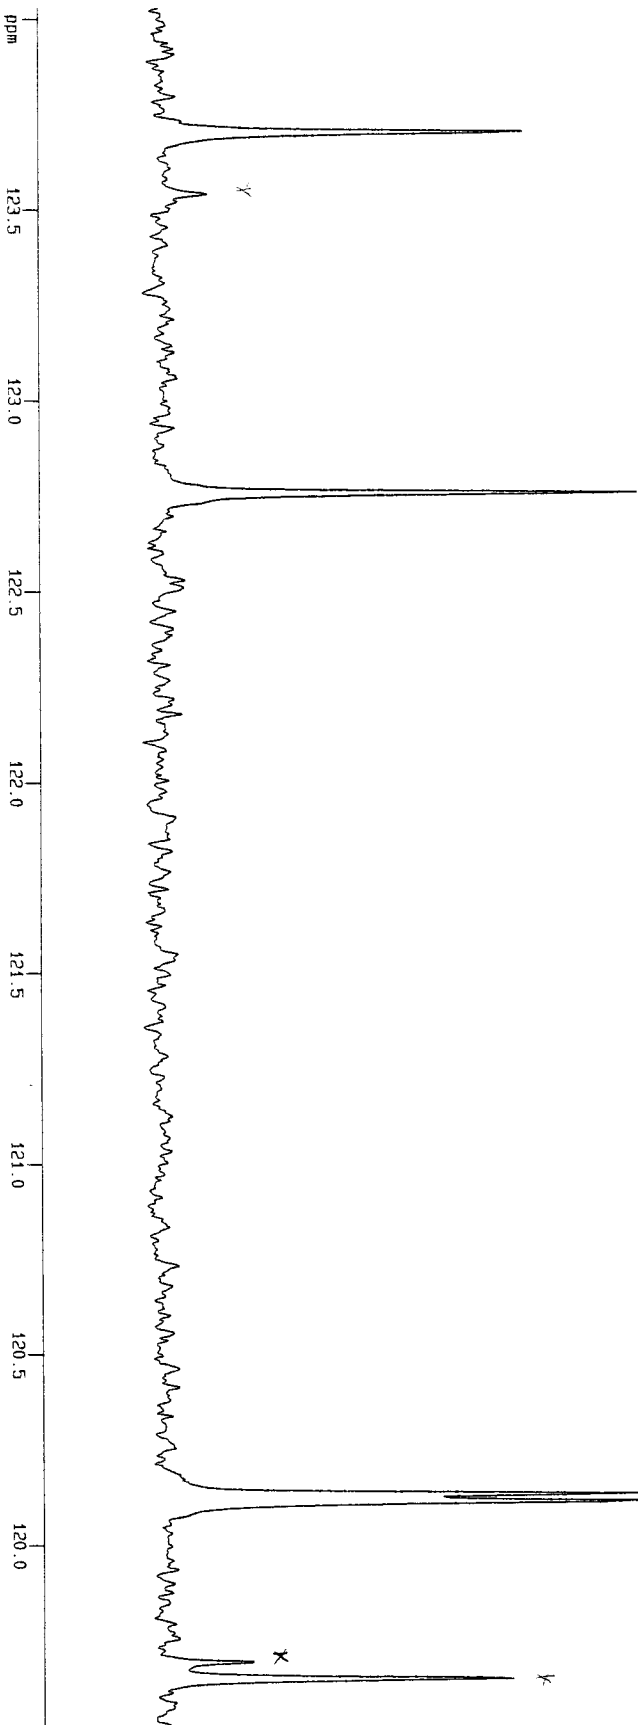

Current Data Parameters  
 USER yshin  
 NAME ysh01505  
 EXPNO 3  
 PROCNO 1

F2 - Acquisition Parameters  
 Date\_ 20060815  
 Time 0.37  
 INSTRUM crys500  
 PROBRD 5 mm QNP1H-  
 PULPROG zgpg30  
 TD 65418  
 SOLVENT CDCl3  
 NS 20314  
 DS 4  
 SWH 30203.031 Hz  
 FIDRES 0.46222 Hz  
 AQ 1.0794470 sec  
 RG 5160.6  
 DW 16.500 usec  
 DE 6.00 usec  
 TE 298.0 K  
 D1 0.25000000 sec  
 d11 0.03000000 sec  
 MCHRES 0.00000000 sec  
 MCNTRK 0.01500000 sec

\*\*\*\*\* CHANNEL f1 \*\*\*\*\*  
 NUC1 <sup>13</sup>C  
 P1 15.00 usec  
 PL1 -1.00 dB  
 SF01 125.7942346 MHz

\*\*\*\*\* CHANNEL f2 \*\*\*\*\*  
 CPDPRG2 waltz16  
 NUC2 <sup>1</sup>H  
 P2 100.00 usec  
 PL2 1.60 dB  
 PL12 23.54 dB  
 SF02 500.225011 MHz

F2 - Processing parameters  
 SI 65536  
 SF 125.7903105 MHz  
 KW EM  
 SSB 0  
 LB 1.00 Hz  
 GB 0  
 PC 0.70

10 NMR plot parameters  
 CX 22.80 cm  
 CY 7.00 cm  
 F1 124.123 ppm  
 F2 1560.443 Hz  
 F3 119.510 ppm  
 F4 15032.06 Hz  
 F5 0.19819 ppm/cm  
 F6 24.32894 Hz/cm







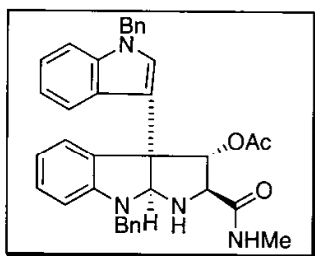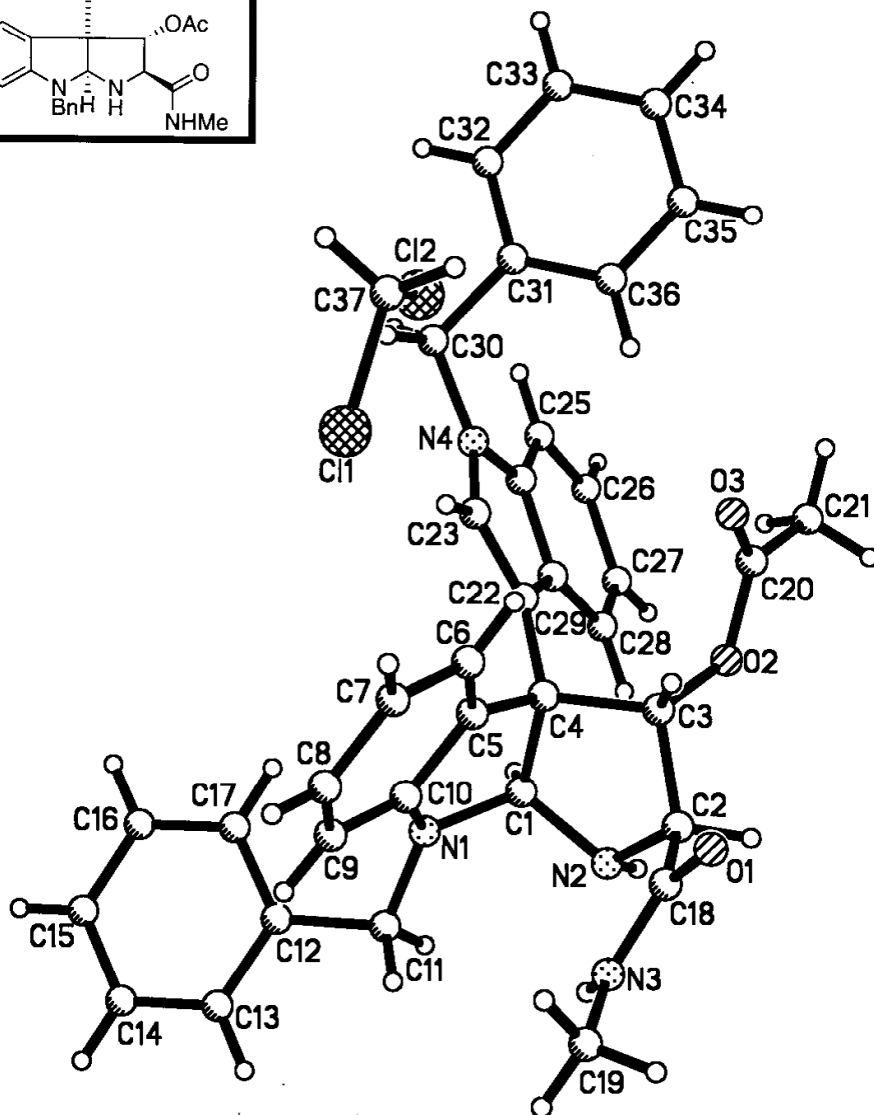

Supplement: NIHMS61751-supplement-si20061204_033.pdf [file NIHMS61751-supplement-si20061204_033.pdf]
